# Supplementary material for: Inhibition of high level E2F in a RB1 proficient MYCN overexpressing chicken retinoblastoma model normalizes neoplastic behaviour
Source: Springer Nature journal article supplement (doi:10.1007/s13402-023-00863-0), 2023-08-22

## Supplementary figure S1

*Cellular Oncology*

### **Inhibition of high level *E2F* in a *RB1* proficient *MYCN* overexpressing retinoblastoma model normalizes neoplastic behaviour**

Hanzhao Zhang (1), Dardan Konjusha (1), Nima Rafati (2,3), Tatsiana Tararuk (1) and Finn Hallböök (1)\*

#### **Affiliations:**

1. Department of Immunology, Genetics and Pathology, Uppsala University,
2. National Bioinformatics Infrastructure Sweden, Science for Life Laboratory, Uppsala University
3. Department of Medical Biochemistry and Microbiology, Uppsala University, Uppsala, Sweden

\* Corresponding author:

Finn Hallböök

Department of Immunology, Genetics and Pathology

Rudbeck laboratory, Uppsala University

751 85 Uppsala Sweden

Finn.Hallbook@igp.uu.se

**Fig. S1.** Gene set enrichment analysis (GSEA) of GO terms of comparison between DMC and E14 retina

**(A-B)** Top 10 downregulated and upregulated GO terms in cellular components (CC) from GSEA.

**A** Top10 downregulated GO terms

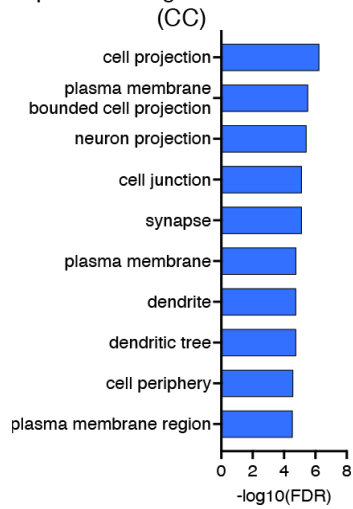

**B** Top10 upregulated GO terms

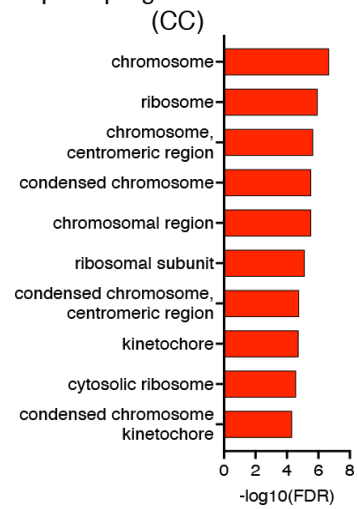

Supplement: MOESM1 [file 25948608]
