# Supplementary material for: Inhibition of high level E2F in a RB1 proficient MYCN overexpressing chicken retinoblastoma model normalizes neoplastic behaviour
Source: Springer Nature journal article supplement (doi:10.1007/s13402-023-00863-0), 2023-08-22

## Supplementary figure S2

*Cellular Oncology*

### **Inhibition of high level *E2F* in a *RB1* proficient *MYCN* overexpressing chicken retinoblastoma model normalizes neoplastic behaviour**

Hanzhao Zhang (1), Dardan Konjusha (1), Nima Rafati (2,3), Tatsiana Tararuk (1) and Finn Hallböök (1)\*

#### **Affiliations:**

1. Department of Immunology, Genetics and Pathology, Uppsala University,
2. National Bioinformatics Infrastructure Sweden, Science for Life Laboratory, Uppsala University
3. Department of Medical Biochemistry and Microbiology, Uppsala University, Uppsala, Sweden

\* Corresponding author:

Finn Hallböök

Department of Immunology, Genetics and Pathology

Rudbeck laboratory, Uppsala University

751 85 Uppsala Sweden

Finn.Hallbook@igp.uu.se

**Fig. S2.** Expression profile from two patient-derived MYCN tumours

Enriched GO terms based on DE genes from two patient-derived *MYCN*<sup>A</sup> tumours. **A** Top 20 enriched GO terms of downregulated DE genes of public available human dataset (<https://www.ncbi.nlm.nih.gov/geo/>, GSE161449). The comparison is patient-derived *MYCN*<sup>A</sup> *RBI* proficient retinoblastoma cell lines versus the same cell line with *MYCNOS1* silencing. **B** Top 20 enriched GO terms of upregulated DE genes of public available human dataset (<https://www.biosino.org/node/index>, OEP000103). The comparison is *MYCN*<sup>A</sup> *RBI* deficient retinoblastoma tumour versus para tumour tissue. **C** Top 20 enriched GO terms of downregulated DE genes of public available human dataset (<https://www.biosino.org/node/index>, OEP000103). The comparison is *MYCN*<sup>A</sup> *RBI* deficient retinoblastoma tumour versus para tumour tissue.

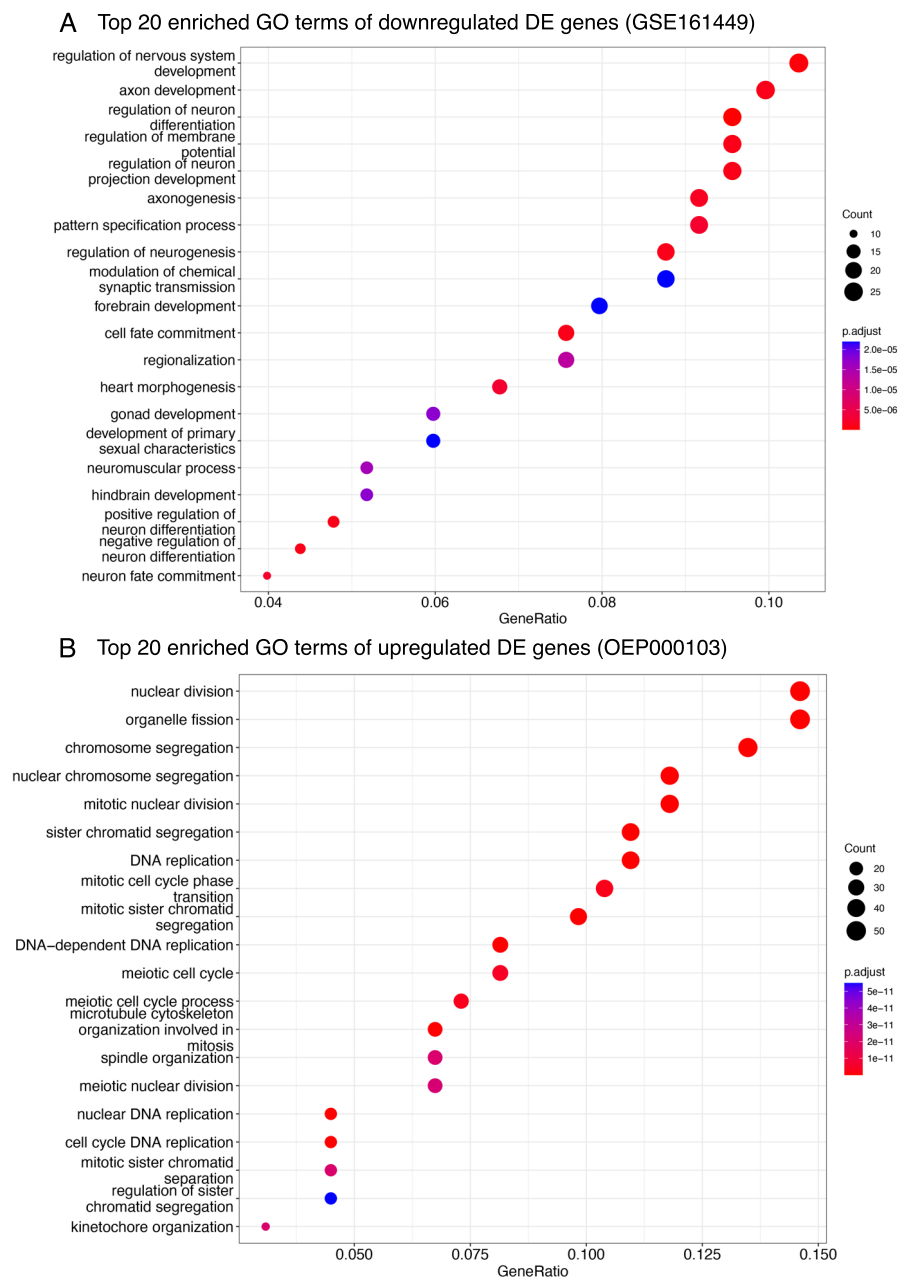

C Top 20 enriched GO terms of downregulated DE genes (OEP000103)

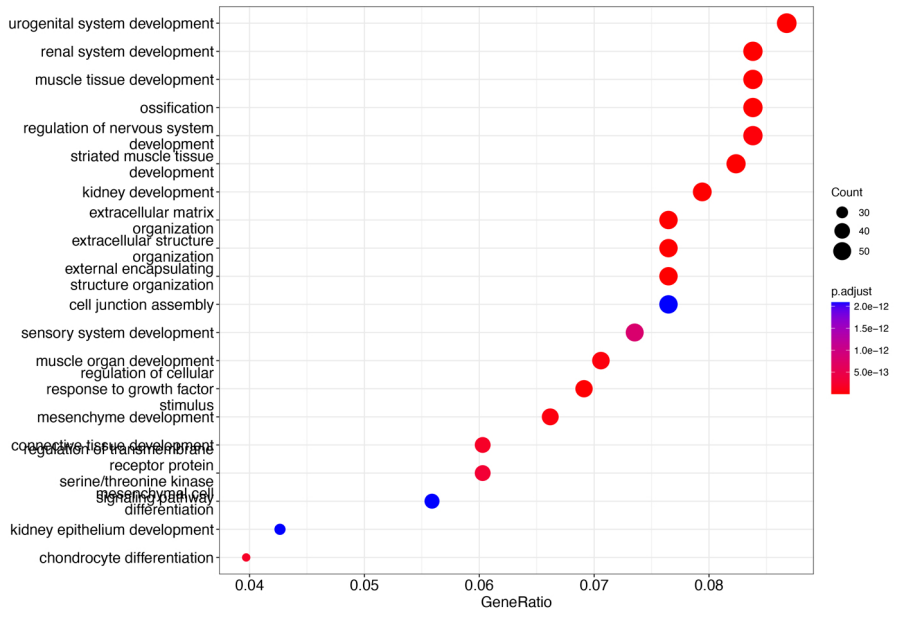

Supplement: MOESM2 [file 25948608]
