# Supplementary material for: Inhibition of high level E2F in a RB1 proficient MYCN overexpressing chicken retinoblastoma model normalizes neoplastic behaviour
Source: Springer Nature journal article supplement (doi:10.1007/s13402-023-00863-0), 2023-08-22

## Supplementary figure S3

*Cellular Oncology*

### **Inhibition of high level *E2F* in a *RB1* proficient *MYCN* overexpressing retinoblastoma model normalizes neoplastic behaviour**

Hanzhao Zhang (1), Dardan Konjusha (1), Nima Rafati (2,3), Tatsiana Tararuk (1) and Finn Hallböök (1)\*

#### **Affiliations:**

1. Department of Immunology, Genetics and Pathology, Uppsala University,
2. National Bioinformatics Infrastructure Sweden, Science for Life Laboratory, Uppsala University
3. Department of Medical Biochemistry and Microbiology, Uppsala University, Uppsala, Sweden

\* Corresponding author:

Finn Hallböök

Department of Immunology, Genetics and Pathology

Rudbeck laboratory, Uppsala University

751 85 Uppsala Sweden

Finn.Hallbook@igp.uu.se

**Fig. S3.** Relative mRNA levels and normalized counts of hMYCN-GFP, MKI67, E2F1, E2F3, RB1 and PRDM13.

To verify the RNA sequencing analyses we performed qRT-PCR analysis of one sample of the “young” MYCN cells (DMC8) and E14 retina. The result was compared to that of the RNA seq. analysis. The qRT-PCR result for each gene was normalized to the average level of three house-keeping genes: b-actin, GAPDH and TBP. **(A)** Bar graphs showing mRNA levels relative to the average house-keeping gene level. Mean $\pm$  SD of the technical replicates of one analysed sample, n=1. **(B)** Bar graphs showing the mean normalized counts from three samples of “young” MYCN cells (DMC8) vs E14 retina. Mean  $\pm$  SD, n=3.

A

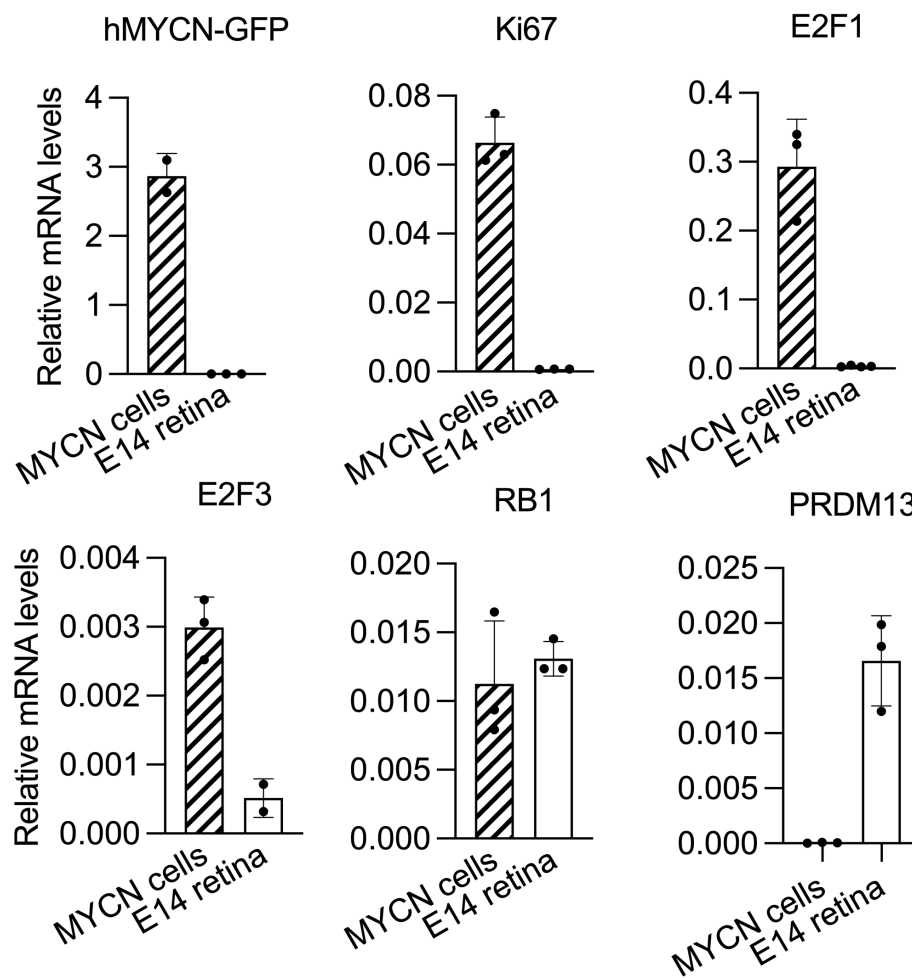

B

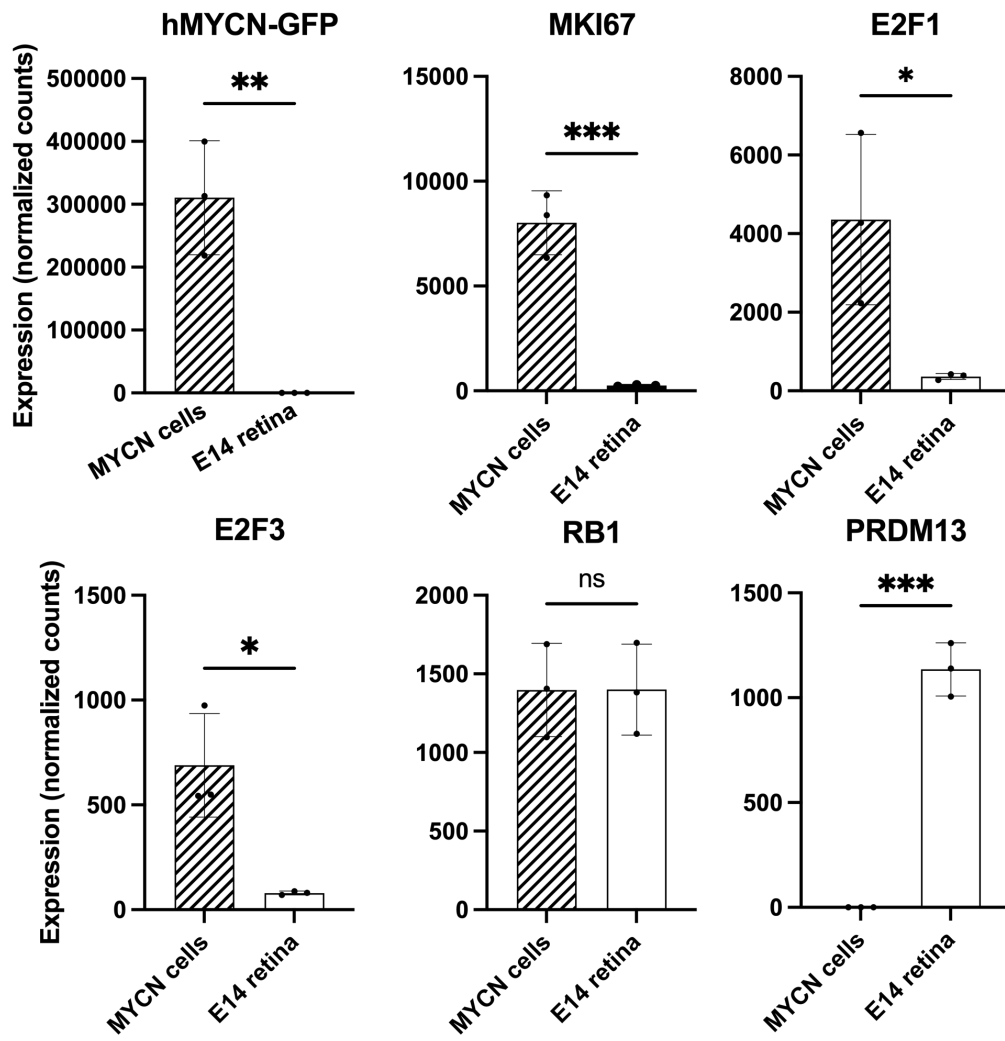

Supplement: MOESM3 [file 25948608]
