# Supplementary material for: Inhibition of high level E2F in a RB1 proficient MYCN overexpressing chicken retinoblastoma model normalizes neoplastic behaviour
Source: Springer Nature journal article supplement (doi:10.1007/s13402-023-00863-0), 2023-08-22
Supplement: MOESM4 [file 25948608]

**Supplementary Table S1:** List of antibodies used in this study

*Cellular Oncology*

**Inhibition of high level *E2F* in a *RB1* proficient *MYCN* overexpressing chicken retinoblastoma model normalizes neoplastic behaviour**

Hanzhao Zhang (1), Dardan Konjusha (1), Nima Rafati (2,3), Tatsiana Tararuk (1) and Finn Hallböök (1)\*

**Affiliations:**

1. Department of Immunology, Genetics and Pathology, Uppsala University,
2. National Bioinformatics Infrastructure Sweden, Science for Life Laboratory, Uppsala University
3. Department of Medical Biochemistry and Microbiology, Uppsala University, Uppsala, Sweden

\* Corresponding author:

Finn Hallböök

Department of Immunology, Genetics and Pathology

Rudbeck laboratory, Uppsala University

751 85 Uppsala Sweden

Finn.Hallbook@igp.uu.se

**Supplementary Table S1:** List of antibodies used in this study

| <b>Antibody</b>   | <b>Host</b> | <b>Dilution</b> | <b>Company</b> | <b>Catalogue number</b> |
|-------------------|-------------|-----------------|----------------|-------------------------|
| Human MYCN        | mouse       | 1:250           | Abcam          | ab16898                 |
| Actin             | rabbit      | 1:3000          | SigmaAldrich   | A2066                   |
| Rb                | rabbit      | 1:1000          | Abcam          | ab39690                 |
| Rb (P-ser608)     | rabbit      | 1:1000          | Abcam          | ab60025                 |
| Visinin           | mouse       | 1:1000          | DSHB*          | 7G4                     |
| Cleaved Caspase-3 | rabbit      | 1:1000          | Cell Signaling | 9661                    |
| E2F1**            | rabbit      | 1:500           | LSBio          | LS-C102852              |
| E2F1**            | mouse       | 1:500           | Santa Cruz     | sc-251                  |

\*DSHB: Developmental Studies Hybridoma Bank

\*\* : Antibody not working
