# Supplementary material for: Inhibition of high level E2F in a RB1 proficient MYCN overexpressing chicken retinoblastoma model normalizes neoplastic behaviour
Source: Cell Oncol (Dordr). 2023 Aug 22;47(1):209–27. doi: 10.1007/s13402-023-00863-0 (PMC10899388; doi:10.1007/s13402-023-00863-0)
Supplement: Supplementary file 6 — (XLSX 0.99 MB) [file 13402_2023_863_MOESM6_ESM.xlsx]

## Sheet: Information
Supplementary Table S3: DE genes - Young DMC8-10 vs E14 retina and seq-counts for the replicates
Cellular Oncology
Inhibition of high level E2F expression in a RB1 proficient MYCN overexpressing retinoblastoma model normalizes neoplastic behaviour
Hanzhao Zhang (1), Dardan Konjusha (1), Nima Rafati (2,3), Tatsiana Tararuk (1) and Finn Hallböök (1)*
Affiliations:
1. Department of Immunology, Genetics and Pathology, Uppsala University,
2. National Bioinformatics Infrastructure Sweden, Science for Life Laboratory, Uppsala University
3. Department of Medical Biochemistry and Microbiology, Uppsala University, Uppsala, Sweden
* Corresponding author:
Finn Hallböök
Department of Immunology, Genetics and Pathology
Rudbeck laboratory, Uppsala University
751 85 Uppsala Sweden
Finn.Hallbook@igp.uu.se
Data are in seperate work sheet

## Sheet: DE genes
Supplementary Table S3: DE genes, Young DMC8-10 vs E14 retina and seq-counts for the replicates
gene_id	Name	logFC	logCPM	PValue	FDR	E14.Retina.Rpt1	E14.Retina.Rpt2	E14.Retina.Rpt3	DMC.10	DMC.8	DMC.9
ENSGALG00000000003	PANX2	1.13244695044946	4.40394080002993	0.00039884636625764	0.000865069395858558	342.875674617572	402.708323422198	254.784344693319	651.279486583791	768.354098713317	1098.01544949702
ENSGALG00000000048	Uncharacterised	-4.02813930208426	2.89507314044345	1.37242234372634e-19	1.4276421603798e-18	355.560540026219	330.590449449094	368.235882640046	27.969556224765	13.2148778372725	34.2364358073746
ENSGALG00000000055	LAMTOR3	-1.08005395680455	5.64285194430873	0.000181711298784844	0.000415022723572135	1386.99957412389	1640.53983238789	2099.01290189712	938.34603389739	915.643044312261	848.996155303578
ENSGALG00000000067	SPR	-1.57198501481377	2.20889944122922	0.000612189254332604	0.00128859960009734	151.10321048052	182.930083634087	182.967513637004	49.3355439258172	35.3408369624512	126.198952234658
ENSGALG00000000071	Uncharacterised	-1.38688529210032	2.51579675128992	0.00156336723217912	0.00306820651085998	260.236509860001	119.094071855964	240.097103395348	82.0781781562371	86.1126920643523	99.6783695628087
ENSGALG00000000086	TIMM17B	1.57818734062335	7.26784880882058	5.44960767383561e-10	2.45593430438606e-09	1781.78045080831	1798.33398670312	2268.72122390351	7002.41661399609	5119.12421767972	7990.86814118519
ENSGALG00000000104	Uncharacterised	1.9959369290404	0.113833315696704	0.000441861062132143	0.000950130231364886	17.8178652890345	6.99238905619125	5.28595113490899	60.742063529213	31.0489485656699	46.7501645685588
ENSGALG00000000109	AFMID	-1.08250365985369	5.37433806063707	0.000157211078306654	0.000362764607134215	1502.12200308651	1673.04027047759	1085.82589852522	592.756297802192	695.671954240436	1026.10799282518
ENSGALG00000000112	PLP1	-1.37044778601522	1.82097975890341	0.00479724404169141	0.00869324330167417	125.817124299445	150.606364857082	102.597722695296	27.5895032827537	70.6055117736562	65.0591274650003
ENSGALG00000000122	GNB2L1	1.5526315707704	10.8954557989813	2.71206491067728e-08	1.01610499746646e-07	25504.492374724	27355.3913859962	20476.0127129258	102958.902083171	52516.7925513656	93244.0380563578
ENSGALG00000000141	BLB1	-3.17877619992656	1.59700764955428	3.99606730693338e-10	1.82443513569217e-09	127.006132833809	191.301586323966	86.8217341987521	14.2542922312276	17.4809726404781	18.5008289721815
ENSGALG00000000150	RPL9	1.14930173641149	9.78321292897482	1.04782362699221e-05	2.8695611738174e-05	12303.9322583565	14887.3275704326	14257.4768655584	31219.0920393897	25099.4329038199	51772.813970216
ENSGALG00000000151	ADAMTS19	-5.05259905795452	1.54503965663217	9.81089598828026e-16	7.52149788974342e-15	173.390981347026	148.233689926424	99.3440997081875	3.5635730578069	8.15778723222312	1.76198371163633
ENSGALG00000000154	DENND2D	-4.5973089279956	0.507281989365306	4.1907124208586e-14	2.76937811847771e-13	66.9553810421805	60.742063529213	71.1121080052439	0.834824367295693	3.5635730578069	4.6615927041275
ENSGALG00000000162	DMB1	1.98876338284027	1.16134485412508	5.64223284276893e-05	0.000139717950324205	24.9450114046483	25.6387598727012	14.9768615489088	98.2917028018174	110.173688458829	78.4734905257951
ENSGALG00000000168	ADORA1	-10.1127917213366	3.97040540283413	7.83476436791753e-61	1.0603314266499e-58	741.053175056399	909.43371927833	713.774834037817	0	1.16539817603187	0.880991855818165
ENSGALG00000000195	SLC23A2	-1.3313478762375	6.43782271596654	0.000448500637074133	0.000963626105542559	3036.89883232707	3381.0037559945	2968.49410998391	932.190792735464	2061.05795398099	966.755806365882
ENSGALG00000000208	MCC	-4.4520638198184	3.33620896058397	1.01861413746962e-20	1.18196669337354e-19	428.26490042269	545.226677844455	481.309446701164	39.6446335118174	17.6704184812256	17.026842761819
ENSGALG00000000209	PRNP	-3.47356078919575	6.26244189152762	1.41431914960961e-34	4.15922724640183e-33	3715.21859471186	3349.0405529173	3590.54304623044	320.617883422801	376.220499310277	377.947151258983
ENSGALG00000000217	PPFIA4	-2.645487175119	6.0928714918636	2.07074525910842e-16	1.68492603506472e-15	3173.00222761426	2536.19642784432	3194.14931748092	388.077592618614	348.872774903993	975.186219932638
ENSGALG00000000218	SRP19	1.32956055879148	5.94800430360545	0.000797520123789069	0.00164553662131525	1098.7388564776	1043.33104929979	516.408537566325	1174.64400340209	2275.9894383508	4438.85871423485
ENSGALG00000000220	Uncharacterised	-3.76057863167764	7.99183727383649	4.42103162669337e-25	7.09022278897632e-24	14173.7586817609	11599.1863371328	10122.2756090539	542.057968240149	1172.97191229404	1264.66931382814
ENSGALG00000000225	MGAT4C	-3.20248219734086	-0.203267659236862	1.19513937674261e-07	4.18346095374432e-07	30.8885015899406	40.3871613218115	39.6235379850837	1.76198371163633	2.2088023101532	10.0157898598935
ENSGALG00000000226	TMEM9	-1.66602857540505	3.38035608683066	1.92638757789593e-05	5.08552516831882e-05	315.18917386661	418.441488893874	457.696668657283	119.094071855964	160.428519086892	136.796963593729
ENSGALG00000000227	DPYSL2	-2.74568428467765	8.73146729736293	4.9176982073167e-23	6.82253465728466e-22	17672.1442704063	21795.9490889762	16537.7485749019	3407.19616727399	2869.31631137846	3115.94177984312
ENSGALG00000000241	STARD4	2.18394416081652	7.21026013755854	8.97589993100389e-12	4.80223319019381e-11	1676.64322254617	1355.75477248821	1010.86689073122	4390.05492911207	6110.55951195479	10996.5223010977
ENSGALG00000000244	CAMK4	-2.76915075391261	0.63636210244127	2.85013436137991e-06	8.38167007427534e-06	43.1686009350901	69.5772727698258	85.1342138090948	5.84377057106985	4.75143074374253	24.4733616966694
ENSGALG00000000255	MAN2A1	-1.29021606021631	3.25878914657658	0.00274640213869167	0.00517702267843485	411.648963241623	300.536772226449	310.0308560292	97.8934467866774	101.314063419089	307.023521111295
ENSGALG00000000259	PSMF1	-1.19007922585005	6.63131026509987	7.38548006866662e-06	2.06131359744793e-05	3582.57878078187	4116.18635774458	2733.71772860376	1915.03160290282	1471.31953041836	1792.36791658385
ENSGALG00000000273	FER	-1.20860339576174	4.67819047676108	0.000287474116240938	0.000638227185085967	1179.05401177799	812.528909597945	708.286455016278	306.083206040968	467.349464698766	549.269348945061
ENSGALG00000000274	Uncharacterised	-6.18773954284914	3.50116185158433	6.71482532741641e-27	1.22501689570184e-25	542.001134497773	529.604125329125	612.758208420199	15.278906579704	0	11.7046377563197
ENSGALG00000000275	KCTD9	1.57404515778136	6.26629401830732	2.1808230078707e-08	8.25935338474845e-08	1148.81109692979	692.904224855425	1084.51406725923	3361.00833967593	2287.05485770396	4544.61075314021
ENSGALG00000000280	EFNA5	-1.22241912468252	2.7907280840491	0.00607820503274495	0.0108092294649097	222.063281700654	320.721575202621	184.132911813036	89.8611692934528	146.885353625188	104.164214542892
ENSGALG00000000295	Uncharacterised	-3.7622326804613	3.72630633780137	3.22230013247454e-09	1.34392752987823e-08	683.018169412989	788.974565173579	387.636416559992	16.566017326149	93.1468456970096	32.558150324532
ENSGALG00000000296	PCNX1	-1.09312904583125	6.8451671635382	0.000197236205353564	0.000448319415870493	3725.15231486172	3881.75950732804	4236.33070641937	1616.20569281474	2492.33158440504	2010.26756570105
ENSGALG00000000311	DOCK5	-2.05087342659661	3.95469427103304	4.12156790614957e-07	1.3645620354284e-06	643.865873409658	639.007393061206	601.073544452899	238.759394873062	157.328753764303	103.076047130725
ENSGALG00000000313	TNNI1	11.8230360752869	3.08041476651414	2.79375230567216e-39	1.0235783654732e-37	0	0	0	485.032957398798	264.892263963646	761.005008948814
ENSGALG00000000314	NEFL	-1.55038660816036	6.29149170002234	4.40183276100364e-06	1.26394258300912e-05	1562.62947507784	3287.14761557632	3978.22669751012	1139.53009013313	1122.41997393121	1111.71210791071
ENSGALG00000000317	NEFM	3.84851557635007	6.03216203636365	1.10465508635583e-29	2.47066448740933e-28	217.604988387087	201.001010223941	223.352113875625	3061.30095487331	4168.19261994813	2871.54110574254
ENSGALG00000000318	CSRP1	2.16440221092557	0.229005634204949	2.83147396545649e-05	7.32471995393982e-05	13.2528138609192	9.01421087390416	7.51341930566124	64.1443150405241	33.7965471049244	57.2644706281807
ENSGALG00000000336	PPP1R12B	1.25392778170581	6.69460195139747	6.51545907172754e-06	1.82617357709895e-05	1460.30216157247	1352.41547501902	1815.04654410965	5211.66064321454	3410.31947387212	3816.81039194473
ENSGALG00000000367	ASIC2	1.30088890531203	6.74772310182289	3.45643393858096e-06	1.00576312697234e-05	1805.69588855024	1511.38268985793	1377.46020603789	5233.7009642324	3901.75309335472	3787.38398816229
ENSGALG00000000378	SLC25A37	2.01223343472089	2.69500311732776	5.8383374449402e-07	1.89232330235195e-06	57.0171689249104	72.2546869139762	62.5504217630897	324.69393959252	189.298428351987	392.367452628976
ENSGALG00000000379	ITGB3	-4.20767132578526	0.704610957762083	2.37357193606888e-12	1.33675943049179e-11	80.4124741461993	70.4793484654532	75.0992785452088	7.01105290192545	5.00894620377416	1.18785768593563
ENSGALG00000000394	SLC6A17	2.12906603649255	5.0369791650587	7.07387360775964e-11	3.49555833307437e-10	394.271212362346	284.448432020976	243.768715250342	2013.4187776609	927.656948121372	1732.91098039433
ENSGALG00000000399	DUSP28	2.36381067962857	4.14542001623119	4.79741440167037e-10	2.17383352269744e-09	158.4719504535	173.524724726638	101.742741672836	600.280707788398	976.017368635836	909.686396308864
ENSGALG00000000424	CMTM3	-4.60145435615029	1.04674487921389	1.54455509067656e-13	9.63113971210304e-13	71.8999176459641	102.793318611647	117.562984717457	1.92087212670909	7.639453289852	3.41992408984321
ENSGALG00000000433	Uncharacterised	2.13124255976577	1.80529399153616	6.21365011793169e-05	0.000152868932506266	31.4657507528606	18.5008289721815	45.2804473581406	116.183162374765	84.317261096865	311.218713715136
ENSGALG00000000441	KCNA10	-1.12908816283255	5.71492872710734	0.00156435733215621	0.00306969541298828	1755.69566344796	1634.30993429022	2059.0643148572	751.061001543254	1269.24059658541	648.075615025289
ENSGALG00000000442	KCNA2	-3.92149874769584	4.05177236341417	2.36874897457524e-09	1.00372899839589e-08	681.216683713285	921.777564286051	744.689434484368	22.0247963954541	112.648917817813	22.0347376917657
ENSGALG00000000451	MEIG1	1.8508067123565	0.576360153837762	0.000447709213705143	0.000962081545912396	19.0057229749701	20.9771671685737	6.16694299072715	69.5772727698258	57.090002201393	61.7770031798813
ENSGALG00000000452	TNFRSF10B	6.17738416486578	4.60921311755763	2.58614809250609e-59	3.2056151542905e-57	18.7748196363022	16.0252637758296	15.0268386113225	1405.23564246185	1121.11304534266	1637.76385996597
ENSGALG00000000461	MRC2	-1.97605841481656	1.891728248174	0.00799119089599289	0.0139310153592999	119.554514225266	182.743677531816	138.107972337983	20.1691573304454	4.36540187991543	122.262286211895
ENSGALG00000000466	LCK	1.9548967062084	1.86515635965486	0.00245526090960753	0.00466601596849473	48.9467233933387	8.80991855818165	51.9068542886002	181.285796464072	55.0984082415157	285.085844624552
ENSGALG00000000474	RPL36	1.14267067586669	8.28374709062544	4.81723482087791e-06	1.37518263945983e-05	4313.53750581685	5329.91743679318	5060.1588803304	12301.289282789	9316.7281442262	16025.2637758296
ENSGALG00000000476	LRRTM4	-1.54687437746222	5.14832726859647	0.000132170629734858	0.000308460155230235	1608.35930675685	1301.7497626276	1084.50097451216	590.854617965981	617.974234355429	250.447310188708
ENSGALG00000000478	TANC2	-1.7847478311799	6.40257955438976	7.41828223930011e-09	2.97696451860325e-08	2577.1028218418	4026.83755532179	3315.55781081068	781.439776110712	1256.80851447717	1165.8379396916
ENSGALG00000000497	Uncharacterised	9.55275501206719	0.867391193704237	2.67413300289979e-22	3.53257231249601e-21	0	0	0	116.539817603187	68.7173647538168	117.06652243812
ENSGALG00000000504	ETV7	6.21460485118118	3.10446776581058	6.1636654172567e-23	8.48015502376303e-22	10.9135046997886	1.70996204492161	4.18022777011419	440.246132235739	584.390758983862	356.321779504536
ENSGALG00000000516	FANCA	2.18168396664388	2.86277576047581	6.25403021351932e-06	1.75735598987091e-05	66.4522463752058	76.4730094764039	53.7844195478545	272.837617494714	456.559865994069	226.568345140189
ENSGALG00000000518	KLHL12	1.00304075650451	6.36081509566565	0.00012415475458161	0.000291187358092997	1267.775603628	1668.67486859767	1202.10331757989	2725.50850611445	2468.07796302913	4477.66591307362
ENSGALG00000000528	DBNDD1	-1.52152885610928	3.89393286776785	2.57960572913934e-06	7.6539845157886e-06	588.237903318604	570.272341981356	504.135469075771	191.050208328717	203.167099802983	266.040789549209
ENSGALG00000000540	GAS8	-1.11438651847878	4.75609688492427	0.000196193827768226	0.000446256000289828	911.130952938195	893.408455502501	986.762402143509	485.833793547674	503.45201204577	443.138903476537
ENSGALG00000000541	ZC3H11B	-1.33909900675167	7.50303346732134	9.57721612952098e-07	3.00787633260329e-06	7062.13343021091	5458.91653774654	7154.46684239031	3287.58825458592	1815.72421484124	4034.37741949482
ENSGALG00000000542	ZNF593	1.66578455435717	7.01689066852566	2.30567147913271e-08	8.70484509756252e-08	1389.79349254469	1880.95265611545	1425.44482271379	7742.95649824204	3462.45855456519	5963.98527996043
ENSGALG00000000549	URAH	1.5420375917902	2.35908562775514	0.00119198604663206	0.00238703169809466	50.9031113577909	75.3031824285411	69.2534628193251	229.91252735628	252.31087295586	133.542419533422
ENSGALG00000000557	ETNK2	5.46451572642913	4.99694628763694	1.48041731733487e-39	5.48457398877443e-38	51.9068542886002	37.058422481606	17.5313117132096	1539.46356097258	1835.5021272502	1916.15728640451
ENSGALG00000000558	SLC1A6	2.38223716497959	2.2459177978488	0.000361733663031098	0.000790781864641743	38.0600014675953	18.3661360805052	57.0171689249104	367.10042545004	206.152094261451	64.0552669944428
ENSGALG00000000576	METTL25B	1.85541342743987	2.65894656775453	3.57884073736462e-06	1.04024029585069e-05	61.8464646842896	82.1294768511268	60.1073544452899	307.655140657329	242.40282061463	286.322353140903
ENSGALG00000000579	VAMP3	-1.64449959874864	2.84436020883517	6.16652148098714e-05	0.000151822116952538	206.201618722036	315.970144458878	294.845738536064	79.2892670236348	69.5772727698258	160.252637758296
ENSGALG00000000581	DDX42	-1.18452057098499	7.24103875284444	9.39170835798309e-06	2.58535134810979e-05	6238.62856653394	5457.55965835727	4208.49809524337	2770.94249808719	2425.82430406621	2682.29069212106
ENSGALG00000000585	MYL4	-5.49999479999837	2.76342066125714	1.35968234373814e-19	1.41549975863414e-18	277.16168994217	348.04230197914	374.092814506232	3.52396742327266	2.2088023101532	21.0331587057764
ENSGALG00000000604	Uncharacterised	-5.34054067061192	7.08532702058508	1.03166535416384e-61	1.53741321261517e-59	7056.485955873	5800.4503787068	7198.48672878928	234.369482721508	147.763913011338	178.178652890345
ENSGALG00000000606	ARL8A	-1.15839479726156	6.64712028566313	3.73628532522859e-05	9.50045097172293e-05	3877.1674868939	3998.48114196536	2601.56895023104	1859.81154514899	1722.71585590168	1656.29154471465
ENSGALG00000000607	GPR37L1	-2.82790412998488	2.24333276755631	2.79286943844426e-06	8.22968837193651e-06	159.900717840339	245.398463245177	216.098114254772	39.2886169192388	5.12988613476482	63.5394621057357
ENSGALG00000000618	ZCCHC17	-1.40987300556249	4.97731779692517	5.25460033392374e-07	1.71359144895084e-06	1209.23912428247	1273.78020640284	976.138976246526	540.052164832457	418.660016143549	517.59110772333
ENSGALG00000000619	ANGPTL4	-3.00228387596447	7.86442868316301	9.8441692869295e-23	1.33091964579557e-21	10657.4591582145	12820.5453345266	7897.21099555403	1437.93030390973	937.477930886032	2261.53921100403
ENSGALG00000000625	MAPT	-3.46400083063097	7.0068180100287	1.02544242606537e-34	3.04260467492281e-33	6920.17763770998	6285.90971606917	4647.46725273512	642.631008091177	491.798030285451	719.77034620344
ENSGALG00000000627	DNAJC11	1.28930241221408	6.52613783423231	1.69568580280062e-06	5.15468274181634e-06	1619.0520933423	1338.10952528177	1091.95027242277	3783.32672970499	3589.42638217817	3726.59555011084
ENSGALG00000000630	HAS3	3.97164375292744	1.5809336028676	2.87919270349761e-10	1.33660247905106e-09	7.26821444728814	7.98971740798249	10.5647966969	77.4858833684988	88.0630453134627	341.942631595341
ENSGALG00000000632	CHTF8	3.00652918917029	2.8377013509833	1.31193241867438e-12	7.54233188941411e-12	35.635730578069	52.4429179214343	29.9537230978176	362.243578865125	317.500538558624	400.715696301933
ENSGALG00000000638	UTP4	1.19376275568212	5.29635475879687	8.7174481853747e-06	2.40974396170539e-05	495.775013535543	649.986034857482	659.722380259126	1473.30892118587	1392.56319969302	1845.90402749287
ENSGALG00000000639	LRRN2	-2.16495808079175	6.08746691867809	2.95426529509006e-15	2.16716928145904e-14	2321.64656544932	3463.7930121883	2626.80748877584	782.32076796653	517.964141730925	866.365822880788
ENSGALG00000000643	ANKS3	-1.65981398418409	4.45650562460748	4.31304333818427e-07	1.42546458495734e-06	996.612598499996	925.326151769308	597.312478244716	346.781962694052	253.399483455306	301.371596593745
ENSGALG00000000645	Uncharacterised	-1.44489966686354	4.76348394183598	0.00197550022986867	0.00380884715056668	490.876727969867	1266.25629320738	1242.31445564998	441.3769197649	136.945743229498	779.228451099715
ENSGALG00000000650	NIP7	1.8588479705831	5.71667974440761	1.33610797056713e-11	7.0264869205519e-11	615.151443377666	596.941075649653	505.90356658119	2686.9340855864	2066.25096610451	2259.74411017359
ENSGALG00000000652	ACOT7	2.40491004326918	7.25055251604444	1.13438314709565e-19	1.18935365058732e-18	1202.6682179167	1180.72879201837	1275.80551543885	8502.77258697751	5011.8355912073	8948.38280227429
ENSGALG00000000653	CNTN2	-2.783894501022	8.29399289371042	3.59461316239841e-20	3.9663356383436e-19	13402.1284115235	12475.6153448668	15600.1349893927	2333.12714841581	2408.63173380686	1901.77878904191
ENSGALG00000000667	EDN2	-8.05951971448129	2.31664032697084	3.28503751055765e-26	5.71028211042281e-25	376.515912142706	167.576280402317	200.650932965481	0	0	2.88130819006363
ENSGALG00000000668	RBBP5	-1.01698424546864	6.69146485501286	0.000329595198399095	0.000724224837038965	4322.83921158625	3148.04012470068	2998.0593567259	1702.83881336465	2121.84066591992	1924.71387096251
ENSGALG00000000669	ETV3	1.23401293468871	5.15765621674939	4.75920261597753e-06	1.36007981675738e-05	540.218482639534	554.882683577061	513.331970170022	1502.44375788942	983.876629382987	1932.39735946934
ENSGALG00000000672	SCMH1	-1.5489014134412	4.50930828460311	4.76723288312838e-06	1.36162495952187e-05	727.699272905804	953.098196831106	881.389507670629	318.902908306955	372.987313383789	269.206978663363
ENSGALG00000000674	MYO1D	-2.51734315575768	2.58522705985366	8.40679843462652e-10	3.7278290751739e-09	273.928967964693	253.929363670859	238.272982896509	49.8391847814044	50.2210808501757	49.9426752944363
ENSGALG00000000678	CITED4	-2.71711277440514	5.60655611940095	2.68561297287571e-09	1.13292890773698e-08	2893.68367108714	1593.71426717506	1909.50959712744	415.655279185581	461.657875114518	152.045783799761
ENSGALG00000000681	PAK1	-2.59797059538582	3.78456088834736	1.07025211568923e-12	6.21758817800539e-12	620.0617120584	626.984218705148	536.524040193262	79.5168831655152	117.184741360754	136.911196236494
ENSGALG00000000684	KLHDC8A	-1.29434089461651	5.38384346075342	9.52785040966336e-07	2.99662983123939e-06	1553.42934175202	1450.25845566536	1480.96258776131	626.701089463769	516.676152386114	994.707062928862
ENSGALG00000000690	GDPD4	-6.49633603951459	2.66116189359404	2.73465512486989e-26	4.80393787035091e-25	432.196228509545	284.842472664482	223.15004686227	1.67209110804568	5.19158174806296	4.56555280456142
ENSGALG00000000692	CDK18	-1.68047059089203	1.70903528778358	0.00100468402828663	0.00203343877112248	112.13816575816	163.218512763071	95.0831702720999	73.1204814885834	19.6645635165985	40.1301865930962
ENSGALG00000000695	MFSD4A	-5.09963450983035	1.50623302338308	8.82454454154485e-16	6.7849237248991e-15	167.487933716924	143.343975651921	100.433071563271	3.3132034652298	0	10.852716774844
ENSGALG00000000703	SLC45A3	-4.12211132989722	3.4453231667774	1.45365250349099e-19	1.50741150537928e-18	453.994922926687	489.922694657383	607.415064523366	20.5449876205264	43.2196228509545	34.9232150393234
ENSGALG00000000707	PSMD7	1.05220107682481	6.93071215148494	4.69848146261315e-05	0.000117577282337053	1827.9494260212	1725.59802350314	2449.3882687361	4962.75589855827	3563.21779504536	5859.46067331648
ENSGALG00000000708	NUCKS1	1.42398730244314	8.69429255699612	7.92030827348688e-08	2.82840734063695e-07	5517.69863381533	4578.17683024958	6921.64673594693	17167.4805311255	13018.416653425	22854.4775031552
ENSGALG00000000712	RAB29	-1.90636531437849	3.8961932129807	1.32102213433139e-08	5.14860904132742e-08	659.17568386723	606.18154492471	507.479651291863	152.632503393051	173.491006573334	210.335497874645
ENSGALG00000000713	ZFHX3	-1.18821773125785	7.86771603588589	1.62294211815914e-06	4.95057067919611e-06	9098.58886821373	8095.81530168135	7381.44619646764	4228.02417562247	3199.31112779642	4989.46534912686
ENSGALG00000000719	RPL22	1.19111438674852	8.63551375595522	2.18479828498815e-05	5.73347440716221e-05	6802.67367879652	5339.06407618791	6193.41391713001	16594.3266649417	9188.14063871099	23956.0348182617
ENSGALG00000000720	Uncharacterised	1.29635477020073	0.988705565386638	0.0080483075814634	0.0140176892256007	20.7663269922518	25.1105404250878	37.4570064708272	92.7647899482028	75.2383299765507	59.3592343356215
ENSGALG00000000722	Uncharacterised	5.90784153501854	4.33254660096369	1.16716955399195e-14	8.12180996568481e-14	36.5244224364914	8.6439245701909	4.36540187991543	612.166412081935	1820.07117110772	693.595321541211
ENSGALG00000000723	STX12	-1.17228435103775	6.42121600474066	5.79623824038179e-05	0.000143237391060525	3356.8858204541	3055.67401755557	2569.85324342159	1621.26089565245	1571.47742901729	1194.63366960014
ENSGALG00000000724	PM20D1	-1.77469564098612	5.59392866785114	1.5378105208484e-09	6.62422245469707e-09	2030.52960982869	1671.15875023691	1949.15193938224	562.577512779209	692.24571873091	571.073992286925
ENSGALG00000000734	RPA2	1.03776181415325	6.14170730845316	0.000284635303577654	0.00063203047569905	1049.65477731684	949.195305615203	1496.7006842789	3230.48374396036	1710.00519214306	3432.47878997807
ENSGALG00000000736	MATK	-2.72190243654478	0.879315234571122	1.00114888723637e-06	3.13387719882368e-06	107.984900359709	89.0282796889478	37.4570064708272	15.278906579704	11.9697343144512	12.5406833103426
ENSGALG00000000737	SMPDL3B	-1.19390742427435	3.8416775168696	0.000257019327956841	0.000575041725150401	571.867646268921	457.41484701653	474.873874684972	262.694036451986	174.632394774475	327.5086976039
ENSGALG00000000747	CHD5	-2.03362951741465	7.0479401004775	3.82978524658918e-14	2.53845285984569e-13	5984.31963392367	4713.30642862718	5398.31284601442	1327.09215643589	1061.89659520012	2237.92388030273
ENSGALG00000000748	TJP3	-1.86334195453038	3.24153541644056	3.59639048267593e-07	1.20057706951248e-06	400.52562248224	356.527086366155	359.49958822982	129.789543701574	79.8971740798249	145.986281629891
ENSGALG00000000755	ACER3	1.31190348491249	4.87480601767819	3.05620491922845e-05	7.87535376796715e-05	336.090312717181	444.399397634189	490.796926490353	963.317371544608	829.426357183931	1959.61650348016
ENSGALG00000000761	TSKU	-3.97929339796893	0.422908705148786	4.95458318412879e-06	1.41287114106859e-05	66.5723786687103	74.3833489540899	41.8022777011419	0	11.4138820114036	0
ENSGALG00000000769	RAB7B	-3.81215337744922	2.38331529433903	1.60784275392308e-13	1.0006953751892e-12	295.920159639588	245.398463245177	189.205904480845	31.6491636293868	9.40479124706884	18.3930021885024
ENSGALG00000000775	CTSS	-4.04260476169069	1.73105121020533	4.30833140350896e-10	1.96092654099998e-09	89.3262073006391	270.831552393324	106.051234018901	7.92892670236348	15.4616161710724	7.01105290192545
ENSGALG00000000776	BRPF3	-2.07408712333019	5.67784335253236	4.68007288663031e-08	1.70480106276786e-07	2370.41322079408	2009.20540278289	1876.92226878127	430.901285089225	781.850917781144	370.728320454854
ENSGALG00000000783	PTAFR	-4.18865204659979	0.0342336916740923	5.59802688701366e-10	2.51854242206453e-09	41.4066172234537	69.5772727698258	28.0442116077018	2.50447310188708	2.37571537187126	3.49619452809562
ENSGALG00000000785	HYAL1	2.85996280138367	6.88234940037779	2.14353681878498e-13	1.32292828420405e-12	828.335006713952	772.902844304566	560.150521195301	9970.95190532971	3371.66074616861	4435.29374057129
ENSGALG00000000791	Uncharacterised	3.34941649910225	5.48466404367751	7.53114936762978e-29	1.5607130322324e-27	174.4782927648	225.69296032777	203.944680805578	1891.4895144416	1846.55873128808	3471.47276543909
ENSGALG00000000802	DHODH	2.94007438452948	5.92335820182778	1.28210403010586e-21	1.60420242936736e-20	321.746081223772	440.905589871458	294.968452748977	2187.93121487777	2746.3467447253	4485.6556304816
ENSGALG00000000806	LINGO3	-2.05451761973076	6.14005023570982	1.10395926297284e-14	7.69406815807082e-14	3039.41105889112	3140.34529549853	2422.02397000416	873.224050024189	545.58356014509	982.526092811699
ENSGALG00000000814	HNRNPR	-1.2628005157517	8.37667232525934	4.33359776450543e-07	1.43154438731346e-06	12688.2257922659	11921.799760911	10908.6328075809	5789.61424323783	4960.59989231758	6019.52798896443
ENSGALG00000000816	Uncharacterised	-2.13432336783705	6.09869343211701	2.56125274334158e-17	2.24223730263626e-16	2776.12337993023	2636.05163183401	3030.84542451915	708.802072908161	601.232975659945	900.364137732557
ENSGALG00000000817	ZNF821	-1.97611153158853	6.45755140861008	8.73721612630827e-15	6.15409970702212e-14	3701.52193629818	3562.257358982	3340.62378860528	942.189086751805	750.768907512508	1459.8727875553
ENSGALG00000000836	RFX5	-1.62872966575778	5.92761690149873	2.47998314958466e-09	1.04985689476353e-08	1808.67627999469	2906.78384016161	2241.53377064417	865.712868885633	712.714611561379	994.084644155189
ENSGALG00000000839	WNT11	-5.05058122011006	0.473889135900678	5.37458883315798e-13	3.2080635325911e-12	62.9564573545885	95.5626504346137	37.8826498001811	1.1044011550766	2.0031579719787	3.33929746918277
ENSGALG00000000843	DOT1L	1.07413068211842	7.35448949896329	7.56940654202249e-05	0.000184038568225196	2710.00567248886	3082.8895312801	2184.03160806823	7081.7731996928	5808.7410665987	5925.05484135985
ENSGALG00000000853	SLC2A8	-1.38597711804493	6.16794461931936	2.63729638530914e-06	7.81641608007935e-06	3352.13438971035	2567.37218179822	1950.51596878142	1261.22611909748	1077.69898892454	1019.32055246804
ENSGALG00000000875	PHLPP2	-1.50972199208363	5.64211195025346	2.71126334909266e-08	1.01610499746646e-07	1631.96092145258	1891.81238899414	2063.62986766176	700.157890185463	736.661567235728	766.06299612488
ENSGALG00000000895	NUDC	1.05510020193616	7.1661527095624	4.0680704948944e-05	0.000102712390964752	2604.66492343124	1902.06141671142	2553.3754705371	5264.29915036003	4245.0819076986	7554.77488255062
ENSGALG00000000902	KDF1	-2.31183447686427	1.85408136316711	1.60526279407977e-07	5.54298371202291e-07	176.51377943414	127.83547852772	144.065409503182	43.6540187991543	24.7944496513633	34.2778677149364
ENSGALG00000000906	RALGPS1	-2.7727113193618	6.06239122040105	2.98296060370109e-19	3.01317642702876e-18	3424.16460342107	2474.08329920131	2920.45385766342	389.016365219665	558.478430087256	482.817102569855
ENSGALG00000000908	ADAT1	-1.83342889553213	5.15221618173257	1.03959583373269e-08	4.09752140944923e-08	1739.43181924564	1267.99899626252	1190.45954776366	460.888782143025	474.317057644973	362.087652741266
ENSGALG00000000918	CCDC103	1.25659245861101	1.15762144574585	0.00427143705810881	0.00780116630428217	30.0473695796805	30.0536772226449	35.635730578069	100.224243138741	54.6214950607262	112.648917817813
ENSGALG00000000920	CGN	-1.79971810644071	2.6450269030201	0.000151084194222655	0.000349342689674873	219.730122772426	244.125301774669	264.770669151211	132.401031332281	47.0613671043727	56.7502244389006
ENSGALG00000000949	HBEGF	7.72338323596002	2.04874566101249	2.95009235441179e-24	4.39136643059075e-23	0.854981022460803	1.67209110804568	0	239.691522239475	109.489711222418	383.064014962579
ENSGALG00000000966	NPHP4	1.39269550088121	7.41447541210386	6.41888958317917e-07	2.06685439528297e-06	2325.82534906197	3038.1930449151	1759.34073606887	7479.00462217874	6322.96813855077	7316.40075497945
ENSGALG00000000975	C1orf174	-1.05415891621223	5.18471577239049	0.00108913512672572	0.00219313792967626	978.414158470552	1273.383439323	1456.74772003984	534.762056481626	807.317244360995	621.980550299387
ENSGALG00000000990	SRSF6	-1.92973998225325	9.34675669865927	6.03022943661472e-13	3.5881082556223e-12	28828.8534469936	25880.9774608576	23382.7763984297	8708.97675043128	6850.96293297842	7505.18093846302
ENSGALG00000000997	GJC3	-4.9783347937622	4.47745231386499	2.01178341593301e-36	6.50787401110231e-35	935.838115738472	1280.51058543861	1046.52756207662	49.3355439258172	18.7748196363022	53.0836862574356
ENSGALG00000000998	MTFR1L	-1.11391091631359	5.7314274785715	1.45564798452249e-05	3.90025438762057e-05	1790.25282209287	1930.5989813926	1774.94060262863	819.324642942381	793.27369110402	1333.14141893194
ENSGALG00000000999	ZNF319	-1.43609985873116	3.83939473547151	3.0817634361172e-05	7.93350707554784e-05	412.100852826107	514.168015724045	648.947718507869	236.267357636054	150.788461946663	291.390575484355
ENSGALG00000001003	Uncharacterised	-2.55907956716527	5.00269738539768	1.63900080972215e-17	1.45697504955394e-16	1293.29604434107	1411.42467618789	1437.26584489472	202.862321252853	272.01941007926	321.649896584797
ENSGALG00000001006	TP73	2.81121645724016	2.18117168247366	1.60125801836247e-08	6.16830818981743e-08	26.8922097739272	37.1059159792811	19.6645635165985	125.406833103426	214.931484369806	343.557848543247
ENSGALG00000001025	GOLGA1	-1.24486784255808	5.10223580929218	2.9668338022263e-05	7.65398107740272e-05	1332.12481987275	1294.34165739492	1025.1222459305	411.334412579236	602.223482775303	736.19538973553
ENSGALG00000001034	AAR2	-2.32939900146152	5.66027938106259	8.1577319238558e-18	7.45151504862944e-17	1859.36531214679	2028.870147143	2489.36766668712	497.505880817654	362.32835603298	607.891506969631
ENSGALG00000001035	Uncharacterised	-4.50389407890313	6.72883038506127	7.88525358576534e-42	3.47448898033242e-40	5339.06407618791	6266.5343986186	3776.45117620937	221.552071816052	172.36051403569	408.616976008248
ENSGALG00000001037	SCAI	-1.79695244969557	4.63927048877113	3.47223079969658e-08	1.28458011426432e-07	1134.21998626367	1024.61530266711	764.699120442855	276.770840823002	348.45405463353	309.228141392176
ENSGALG00000001038	MAN1C1	-2.7254012279722	7.39402290284642	9.91001651260872e-24	1.43646501646699e-22	7985.15185517793	6804.68950886695	7324.05300402811	1085.82589852522	1266.6090143446	1419.37844992041
ENSGALG00000001042	MTMR4	-1.15060248922059	6.58591020795927	9.58743983605539e-05	0.000229237812413201	2671.16554510297	3514.70084343862	3831.64019122818	1425.28711801814	1958.97409361205	1596.24956893432
ENSGALG00000001046	DLGAP4	-1.81013881235679	8.31339720945485	7.08855479891228e-11	3.50150846547388e-10	9331.66677763126	14539.3780758521	13592.0389270597	3524.84841512848	3176.2577220003	5758.07759045278
ENSGALG00000001048	OLFML2A	3.94191766923346	6.17646602196263	4.99854103053993e-35	1.51359930794637e-33	195.307902267923	239.594593413864	232.820106443384	4129.00573768093	2159.31103861032	5940.57381315703
ENSGALG00000001051	LDLRAP1	-1.87688227282913	5.70318938968514	9.10651442018127e-11	4.44369759951671e-10	2116.36308767388	1723.22006998033	2351.27005915808	564.890548097994	682.886332447877	629.564573545885
ENSGALG00000001056	ABHD11	1.17773075597047	3.78546831052954	0.00398233251620406	0.00730737080276901	184.290533422041	221.228457333359	230.444391071513	861.229252087555	362.087652741266	395.375613517423
ENSGALG00000001058	ARHGEF16	1.07507340394502	3.69478960595462	0.00846228792090462	0.0146866428546137	166.130615938015	251.105404250878	209.375061811291	620.978417417969	212.035293570279	749.096816404463
ENSGALG00000001062	GGT7	-3.27578011689509	3.06469308681302	5.63766693168762e-15	4.03738534098126e-14	412.987507242454	348.140799923255	380.466554995057	47.6545965793018	24.9195923907022	66.2005156661407
ENSGALG00000001067	TMEM57	-1.45723980898163	6.42802738042711	9.1815772389273e-08	3.25515260411368e-07	3668.10453416923	3343.52736703545	2540.78051217959	1285.52294450916	1310.06531367407	1293.97776930832
ENSGALG00000001073	NR6A1	1.5514283794712	4.49499971163113	3.97444555055073e-07	1.31914592935321e-06	311.218713715136	335.63467469718	218.485980242905	942.05418528034	772.217398197789	1208.82568384416
ENSGALG00000001076	LIMK1	1.49570072246942	6.05908745493422	8.39396372346786e-05	0.000202637679039596	901.696678900881	844.223299688644	892.724684442705	2060.50426413054	1213.93814444116	5980.70217376852
ENSGALG00000001084	ATP8B3	-2.39417919212606	0.761270178236112	1.15736790446602e-06	3.59657228606675e-06	50.9987787953931	83.0653079690073	74.1902330741232	11.5252327602545	12.0048551697674	22.2295065839809
ENSGALG00000001091	Uncharacterised	2.28217863766969	0.726780825275231	7.78099356852258e-06	2.16350770858103e-05	6.6883644321827	17.651377943414	15.979434815965	67.2305244348181	73.1204814885834	82.9331591786979
ENSGALG00000001094	ADGRD2	-5.56263551506537	-0.38200795548914	8.50444813597806e-13	4.97330227634378e-12	30.3003525768287	38.7636416559992	36.4452381175278	1.00157898598935	0	1.18785768593563
ENSGALG00000001109	GTSF1	1.82559701233583	5.11070722881773	0.000138156876526515	0.000321356480773619	368.496820680606	228.240436248235	550.307665294673	2803.24942200072	539.765067605254	1379.46699405327
ENSGALG00000001115	MMEL1	-3.80871594039251	2.50778055475393	1.61037724691272e-07	5.55919662306178e-07	335.528960306433	222.89810606795	238.759394873062	12.8193799363506	1.76198371163633	58.5332612190598
ENSGALG00000001117	PFKFB2	-1.40717901773969	5.19076741797859	3.92317802186641e-07	1.30245582237833e-06	1283.32651471367	1302.55897316758	1422.49339896925	689.398473488775	449.484077649927	578.415749088794
ENSGALG00000001118	NEK6	1.39273989528651	7.13155795739412	1.99276742366938e-07	6.82066434583922e-07	1721.45808626869	2133.70303160799	1996.14691907678	4472.98895997032	4808.44791266744	8661.23924426889
ENSGALG00000001122	CALN1	-5.38007486606402	2.28486718037429	2.10632833401547e-20	2.36547270906412e-19	211.519525167778	297.996792338814	204.308488004124	1.92087212670909	4.36540187991543	13.6796963593729
ENSGALG00000001124	LHX2	-6.83216521816887	2.70877545461503	3.21224035120635e-27	6.02601750750352e-26	314.062592716936	408.165075772092	251.364420603476	1.67209110804568	6.22989809767555	1.14138820114036
ENSGALG00000001130	GALNT17	-5.65175175703551	5.87900089998616	4.99206923705077e-50	3.37805174954104e-48	2071.19925526061	3706.11598011917	2951.95357988874	88.9801774376346	37.5496392726044	74.1168449632119
ENSGALG00000001132	APBB3	-2.68915379449555	5.80862309462539	7.58800185068262e-22	9.66759544146047e-21	2487.08489028484	2360.75184372547	2491.55312296173	529.233252903237	334.418221609135	428.82465239
ENSGALG00000001136	Uncharacterised	-2.58933280573557	4.50463332070635	8.19493438364875e-14	5.26086228123588e-13	1377.28429311332	743.833489540899	820.160688496404	202.471688174455	136.966584136843	223.781602761609
ENSGALG00000001144	ZNF346	-1.78854687193484	5.21206098651541	1.26621134091977e-09	5.50976411240779e-09	1170.42376294856	1628.55288741775	1545.31798141827	377.064514290174	491.458514009087	550.868442294143
ENSGALG00000001146	UBXN6	-1.79649746851089	4.90527689636891	4.57135168105238e-09	1.86725707871259e-08	1383.32763494983	1002.56873192107	1129.80238164336	345.544750166326	404.054993771115	378.926601813467
ENSGALG00000001153	AUTS2	-1.52736520616449	7.04257170675684	9.27043382908048e-10	4.09982540430458e-09	4681.0210979729	4693.55974028421	5435.58609022191	2030.52960982869	1442.57496715853	2479.54826779196
ENSGALG00000001171	SEMA6B	-5.94763139013191	4.62637341338997	1.32614379949315e-41	5.7479232721169e-40	1357.70986366776	928.01056496535	1385.1140103832	15.979434815965	30.7339540273454	18.5529579896406
ENSGALG00000001175	C4BPA	-3.07286676442539	5.67726759595692	1.0565288524663e-28	2.1558064877324e-27	2487.08489028484	2359.79140766212	2071.38319201987	295.823433771438	287.599670583856	348.874293469831
ENSGALG00000001181	KCNJ5	-1.10695012599054	2.72986607274695	0.00978717827808044	0.0167709748710828	223.781602761609	256.467360445031	199.210578233367	179.74979411491	72.6821444728814	107.290490907193
ENSGALG00000001183	MYH10	-1.4511907114413	8.34459284260842	8.45921467469135e-07	2.67831377967132e-06	12255.164168404	13252.2687569533	10529.9462726273	3344.18221609135	5556.03078677698	5908.96671730362
ENSGALG00000001184	COQ9	2.69135015152193	5.28030702728819	4.30765662739654e-17	3.70268631556451e-16	240.249667311486	227.404390694212	318.763119331065	2582.96149918063	1265.85473150129	1981.8924534816
ENSGALG00000001189	NCF1C	-1.79929664582687	1.22040998209174	6.70651008822391e-05	0.000164354108093336	90.1696678900881	81.6370653851363	94.9474908881605	25.6494306738241	31.7697310528678	28.03454143954
ENSGALG00000001201	GFOD2	-1.03117107413456	6.56301237787633	7.20075622451661e-05	0.000175558143025301	3409.28636572146	3400.36065743385	2797.49645480787	1905.32372824075	1651.36921543717	1717.0531269896
ENSGALG00000001204	ENKD1	2.67651008329455	5.12039568808574	2.86253717035455e-16	2.29400788461706e-15	211.295933938	294.664626894291	204.340464368132	1537.487773848	1054.92941120639	2836.34967983379
ENSGALG00000001206	Uncharacterised	2.84699221915383	0.646357595114221	3.54365378137806e-08	1.30844877790694e-07	10.0157898598935	7.51341930566124	9.50286148748506	95.5626504346137	53.740503204908	75.0992785452088
ENSGALG00000001214	PARD6A	1.47454160932946	3.51420562393962	5.51504049220644e-05	0.000136721461772213	119.81489239127	180.017388277486	154.24316384236	517.59110772333	305.279425285457	658.449969458009
ENSGALG00000001229	SKI	-2.54743728887655	4.67838014218115	2.42924260412555e-16	1.96098871932545e-15	969.812842666492	1198.21706745293	1134.53987193351	228.583783078382	200.80848647611	204.340464368132
ENSGALG00000001239	SLC26A2	1.29544980120329	1.37313863049307	0.0119399072997388	0.0201116320188513	13.3571898767311	41.5750190077471	54.7737142734981	97.7900959958163	89.4564935612046	121.191057304711
ENSGALG00000001252	CREB3L3	2.51847161100541	0.573456914455828	8.53169710657969e-07	2.6980424111723e-06	14.4065409503182	10.9135046997886	5.98486715722562	71.8999176459641	57.1073992286925	77.6143976775442
ENSGALG00000001256	NLRC5	1.73541280034817	1.75154627000259	9.36251479424215e-05	0.000224264102792186	33.2261231876029	45.6555280456143	35.5361343441181	168.067972376744	79.5132350888547	203.15906962755
ENSGALG00000001262	CLIC4	2.52096086685933	7.09534566898489	3.90524309225552e-20	4.3019301605137e-19	1133.11558510859	1045.64846137288	891.5924242718	8121.38299874192	4851.55260682069	7211.7993317275
ENSGALG00000001264	PLXNA2	-3.69607529775702	7.50995073261803	4.90342022061284e-10	2.21959257290062e-09	6518.64718471607	10070.6302748925	9019.2495654111	280.447330499527	1380.55834452325	347.977276141547
ENSGALG00000001267	MAP2K2	1.30455839339624	6.33913952213525	6.78779152158565e-07	2.17770873127215e-06	1014.90261790253	1307.61096761069	1205.90109913118	2981.15781561292	2362.64893732597	4905.16092291816
ENSGALG00000001270	PRKCZ	-2.29815692566492	3.81817191160346	4.37871113690641e-09	1.79354063646664e-08	625.986866243344	488.37225486798	653.321727264598	194.621495397323	71.3603403212713	151.302958245494
ENSGALG00000001273	C2CD4C	12.9581906627888	4.20531977292511	2.13788778257449e-55	1.9828535426773e-53	0	0	0	1479.11716885719	554.298202317142	1202.37033285138
ENSGALG00000001275	PDCL	-1.06407274198817	7.08157968712112	0.000173185056485072	0.00039698468789518	5462.20910224418	4033.80046397007	4370.8461564314	2247.95489691126	2753.02834115054	2339.62225033167
ENSGALG00000001282	GABRD	-7.18335141875174	4.92099393120535	7.5519506179967e-35	2.26609776123281e-33	1578.09277958943	1392.76408558865	1575.94586933305	1.03831634961259	22.8277640228071	9.60436063354544
ENSGALG00000001288	Uncharacterised	-3.06485422933034	1.75802449569911	3.48188646833758e-10	1.60040293390885e-09	138.107972337983	142.144537376473	170.250673316702	20.5195445390593	8.36045554022838	35.3027558868281
ENSGALG00000001304	Uncharacterised	-2.12022740563068	2.15728978539027	0.000770485604427332	0.00159434031616553	177.140522756845	190.294240856724	174.495382502103	41.0647384255634	6.67859493836554	110.470764792014
ENSGALG00000001306	NFRKB	-1.14441942938853	6.00814479558155	2.43273089411128e-05	6.35018890938752e-05	2100.68837218619	2062.52438177434	2537.64515845317	947.352206946496	1194.78246281305	1264.8751947055
ENSGALG00000001314	PTGS1	2.88117904604357	0.59817980675498	3.18458295156744e-08	1.1824502711825e-07	7.01105290192545	6.67859493836554	11.8785768593563	72.2546869139762	67.8363728979987	75.0992785452088
ENSGALG00000001319	CAMK1G	2.23798853260562	3.75726521377841	2.54687278613314e-06	7.57041097321467e-06	102.161056570914	130.232601298128	123.537199337306	398.566176202901	954.114179851072	425.194444704491
ENSGALG00000001330	ATP5MC1	1.66346824375723	7.853341430587	3.04789951754439e-08	1.13423937433196e-07	2232.24162924098	2915.59230971216	3247.24943224431	10632.9876573982	10479.147212737	8218.07758789324
ENSGALG00000001333	MRRFP1	1.29625048145141	5.5590489217091	3.96228604545767e-06	1.14475416393737e-05	569.350218495663	754.289630569127	737.697045428176	1468.61342364888	1598.06847139584	2840.4780042658
ENSGALG00000001334	GNB1	-1.35584107288748	8.89513693390403	3.36864448432216e-08	1.24869569020584e-07	17026.3115009473	18148.0723981317	16654.9217746312	8083.63293113339	6032.74609448343	9154.69881655008
ENSGALG00000001341	ZBTB44	-1.22052937123113	5.71117613923791	1.97888389822221e-06	5.97449058550447e-06	2024.45512181078	1804.86493841476	1714.72943130084	802.618538250533	822.940893022197	1088.1740597807
ENSGALG00000001350	RSPRY1	-2.67310196054055	7.78657234709191	6.15985205730448e-20	6.69108254185335e-19	7232.08349388259	10906.909272261	10744.9711830139	1447.46961910924	1735.01421462534	1923.03165309955
ENSGALG00000001363	MYBBP1A	1.83825942812164	6.56670270722287	1.7658056738116e-11	9.18426692226009e-11	1236.50008248604	970.403460493012	927.174519411327	3610.22594760298	4372.65819856871	4599.52830740491
ENSGALG00000001366	CASP9	-1.26846514311562	3.97047013227446	0.00026287946618412	0.000587657232428786	565.696841315827	666.815137157081	438.605264522392	185.60211299307	242.966025809346	372.092553571756
ENSGALG00000001371	HS3ST3A1	-2.09189751657316	1.48025044047219	0.0216427337489498	0.0345715497666291	28.03454143954	39.9485870399125	266.040789549209	56.7502244389006	2.56494306738241	34.2778677149364
ENSGALG00000001387	SPNS2	-4.78263905261958	1.22682556395023	5.92039635081782e-18	5.49875467793395e-17	108.529275159064	106.952346057928	118.842362122052	5.85231887815987	3.11494904883777	4.56555280456142
ENSGALG00000001389	Uncharacterised	1.0551265858145	6.39065411193527	0.00279087030270868	0.00525561732568865	1652.18412799459	1212.9121520331	1258.9151458819	4176.50762374968	3300.40763452227	1828.05810082269
ENSGALG00000001391	PLLP	3.22503183003074	2.85417727155665	1.56822534846692e-13	9.76955039770634e-13	39.0615804535847	34.2277990591234	30.8842998343264	483.640243053228	273.988467159449	351.199567314359
ENSGALG00000001392	MMP23B	-2.05572842620979	2.32065192495962	1.9702422573285e-05	5.19716051291724e-05	226.356850833593	150.268386113225	225.69296032777	68.7584923858806	56.3834787723625	33.132034652298
ENSGALG00000001412	SEMA7A	-3.04713870461591	7.85199873495341	2.85780168978638e-29	6.19330454438509e-28	10232.1959855599	9226.62770598364	11732.0534703787	1307.0605767161	1336.5538120404	1639.24360659117
ENSGALG00000001418	GUCA1B	6.50284690049835	2.53004828531859	1.1618946606126e-15	8.84119844159779e-15	3.11494904883777	1.14138820114036	4.80218031677272	544.583884519449	272.738946164996	106.1777853609
ENSGALG00000001419	DAB2IP	1.01797942629489	7.59521702494922	0.00030009829990652	0.000664807708645428	3559.98523307103	3202.75891013817	2912.78271021557	6642.10968847175	8202.0156133946	6803.72907280359
ENSGALG00000001431	GUCA1A	11.1146349067585	5.32099803603608	4.56421293367709e-28	9.03509793124764e-27	2.37571537187126	0	0	3174.04891969015	2724.29484189103	411.568413076777
ENSGALG00000001434	STOM	8.18963577066246	7.18687825967492	5.83920803461222e-43	2.77582136785168e-41	20.5195445390593	24.2453210666623	30.1111741387651	14710.2111362969	2507.69856141872	8575.83199309386
ENSGALG00000001437	NTM	1.4110960755567	7.69444223403842	4.65502609865099e-08	1.69614316336286e-07	2908.25713650563	2743.00539694058	2914.99710531353	9437.28052592235	5693.47022289553	11501.4302046587
ENSGALG00000001442	OPCML	-2.9178466843441	3.53940465355962	6.08360180539472e-12	3.30548180028473e-11	419.479805243487	648.308498247722	479.257595613918	88.3993880682874	81.2231971337763	55.1790065655073
ENSGALG00000001446	GSN	-1.82798618206434	6.97317433643637	4.29715359590475e-11	2.16703985332642e-10	4005.48731428473	5331.10529447912	5496.01779816632	1223.69768773143	1296.56695605993	2361.72324896289
ENSGALG00000001450	IGSF9B	-1.16655000249477	7.28904518668936	1.3419627164513e-05	3.6124318060267e-05	4055.65698256479	6212.24671973213	6103.00271149748	2577.8103940436	2145.59502397843	3752.51170758047
ENSGALG00000001452	ATP5PB	1.21478415259176	7.55811591154223	2.05990356745867e-06	6.20356517148145e-06	2562.37812431503	2646.08417848228	3376.60476894015	8140.38065053302	6132.38426451877	8498.34610972536
ENSGALG00000001459	TNNC1	2.96242490092295	1.89518243450515	1.20444593532122e-09	5.25306361070875e-09	25.8795553861665	16.6300076030989	19.8117689925419	128.624810949452	214.25382408486	201.317376183859
ENSGALG00000001463	PDIK1L	-1.37042658752619	4.46343031860225	4.22745142039114e-05	0.000106533703569538	900.396125939209	828.598103158663	673.077777845078	393.16681120727	354.55896104023	277.996514309466
ENSGALG00000001467	ANKFY1	-1.62506901152758	5.45885645847377	3.93519452069369e-08	1.44650312014673e-07	1583.4324331592	1990.58102278878	1448.33758353865	519.482823709936	673.725045699113	618.6737099769
ENSGALG00000001470	STOML1	-3.18579570943162	2.52386165268066	1.21597477634596e-12	7.01804763214815e-12	246.38843055338	257.125905127073	273.207267765195	26.8041580487331	37.8826498001811	29.8188311870682
ENSGALG00000001472	JAM3	-4.69735875470783	7.4038903835484	1.31402209214446e-53	1.10303006380455e-51	6807.15789092908	9144.1284663325	8726.50154212667	333.014921499266	357.825974244818	378.596856703975
ENSGALG00000001474	RAB14	-1.02892147228495	8.03114042317199	0.000525746188582817	0.00111871838587741	7702.48768921241	8627.37054893102	10234.8279996256	4324.84359328551	5676.11379436003	4302.26450502276
ENSGALG00000001475	STMN1	-1.29693493409175	10.0897057181071	2.1843356274065e-06	6.55745663791136e-06	46901.8777978113	33590.49441044	36776.8078759106	16151.0108182239	18488.2060820715	18820.7050974957
ENSGALG00000001476	Uncharacterised	1.66317280885828	5.75636156356148	4.12980744976523e-08	1.51350196756663e-07	763.141198157931	689.086342360673	509.242864050373	2487.37399434921	2411.20882620995	1966.37382218614
ENSGALG00000001480	INKA2	-2.79400627398415	5.54800261148961	7.06309858041616e-22	9.01615750452931e-21	1830.59113675376	2617.0584270093	1737.32143764035	329.401948284998	304.226690436489	378.940882778598
ENSGALG00000001483	Uncharacterised	-1.26489076889589	3.56867576556356	0.00290461755254173	0.0054566490933939	485.936508233704	450.710543695208	325.58150324532	163.924360659117	259.883793255108	141.839688786725
ENSGALG00000001491	NCAPD3	3.11164344887409	5.41264102237446	4.63764330509768e-25	7.41966986194337e-24	194.935673121063	191.45443187123	280.3454143954	1938.07716553633	2094.71105417626	2501.37527719154
ENSGALG00000001506	PTTG2	2.47751124021419	4.90157082751249	5.72450725419761e-16	4.46087777393789e-15	182.257930776979	223.238015166707	280.781497480528	1324.44133136592	1354.36593324376	1662.0831076638
ENSGALG00000001512	KCND3	-4.88339446375482	5.21529646391464	9.79966099748471e-18	8.86581881375442e-17	2116.13372491422	1697.09052394748	1620.6554479186	131.667077458964	49.3266876873474	19.7280106426392
ENSGALG00000001513	CNTRL	-3.11598870301497	5.90616532867072	2.87037928626061e-15	2.10796458879703e-14	3121.68999863884	2932.1418108962	2081.78375529832	268.369480683614	490.773703134782	243.768715250342
ENSGALG00000001529	THYN1	2.45880068412499	3.86893160227113	4.21504946179928e-11	2.12887284888971e-10	139.692860157294	94.9028934931492	103.669648698832	722.668179330363	724.781507724126	614.679080546908
ENSGALG00000001536	Uncharacterised	-3.25619930056369	2.58865942685258	9.64141666419936e-07	3.02660613532014e-06	220.247963954541	318.067532662061	278.438958105039	10.0178924075483	60.5807419827172	17.4809726404781
ENSGALG00000001545	RAB40B	2.82242422180307	2.35190159399376	1.95028952191249e-10	9.21506588141269e-10	40.8628427378342	22.0347376917657	30.8885015899406	286.273702310487	199.28308810145	273.988467159449
ENSGALG00000001551	CCNL2	-1.29878622529706	7.00616583775622	6.95696240200374e-07	2.22713474143798e-06	4169.11289027469	4670.65642109891	4989.06959159245	1714.41015142215	2127.07662467753	2526.98378165113
ENSGALG00000001561	MXRA8	-4.21067784246705	0.804732592640987	1.76874154002144e-12	1.0076812304684e-11	100.404243238055	86.3530832685411	56.851097673553	2.07663269922518	3.42416460342107	9.60436063354544
ENSGALG00000001571	MYO1F	-4.92002313597972	1.5930254541377	1.58671349920197e-10	7.55911678876285e-10	85.1419406682325	246.539851446317	102.766658778936	0	10.2597722695296	5.01627332413703
ENSGALG00000001596	MLLT1	-1.47777269065635	6.09254968805108	2.59472011863814e-07	8.78126382584782e-07	2579.73126617031	2892.07874544397	2125.48282183756	716.491039797572	1066.35089105213	1317.16198411597
ENSGALG00000001597	PSMB3	1.17770654305894	6.96158262383735	8.83842048755887e-06	2.44064066055576e-05	1866.82174247869	2076.27417154401	1837.89743929046	3856.8885769061	5101.84876109354	5810.67530569492
ENSGALG00000001600	DVL1	-3.52132844523373	6.50972639145829	3.47900848691294e-34	1.00308890352014e-32	4965.38759322439	4293.76911293635	3428.62367648341	479.894505117995	348.45405463353	422.876090792719
ENSGALG00000001605	PPM1J	2.01980673057997	1.94195744293003	0.000353018975953151	0.000772239927109789	42.0663174115527	38.4019208956019	32.0721575202621	286.687951303841	140.077705075088	72.8904762350556
ENSGALG00000001607	CYBC1	-2.08187903201453	6.66075979996113	1.86808612176817e-13	1.15777692677623e-12	4228.02417562247	4196.88441559309	3959.87788921079	1228.86062919619	1090.10080363752	923.830337195236
ENSGALG00000001608	UNC5D	-7.09434166716698	6.44249007246137	4.91921012108706e-93	5.01872952584444e-90	4245.96410824213	4241.28565577367	4578.2152215613	35.0542219208929	20.9011388505709	56.0690828790799
ENSGALG00000001610	PIP4K2B	-1.70102395527438	6.01520731304994	1.67947957013383e-11	8.75587167401139e-11	2472.24684367001	2336.74094214161	2672.71730097822	884.905358246931	662.98412434011	1115.15175948392
ENSGALG00000001611	B3GAT1	-5.21856955340843	5.46752685740729	2.30895769421291e-11	1.19112041611613e-10	1906.46637599051	2601.96912136047	2008.16586690865	21.705433549688	137.791491568533	12.8193799363506
ENSGALG00000001613	GNL3	1.12567363283861	7.02900359949224	1.07696950976544e-05	2.94451589528325e-05	1896.77546557651	2240.82994365042	2072.26692201197	4114.01448203317	4567.31280242251	6943.44233279791
ENSGALG00000001616	CDC45	3.70651066645928	4.69675368327257	8.45574221344044e-29	1.73604503060156e-27	104.164214542892	69.2904224855425	104.531476362336	1258.63003011442	1040.45138172125	1942.64163177974
ENSGALG00000001620	Uncharacterised	2.01917057201143	3.33766226470597	0.00132799269236432	0.00263828146776931	225.53391508945	28.7144300319916	46.0726333555101	555.993028618931	323.097290574492	522.09838286228
ENSGALG00000001633	DUSP26	-2.75974167596356	1.65011066487568	5.18139580103926e-07	1.69263183520157e-06	127.743819093634	152.407359400571	126.198952234658	14.1920142440268	35.635730578069	13.9847781123825
ENSGALG00000001634	RPL23	1.02108874194862	9.42153357575239	0.000183697901975017	0.000419271256908388	11674.829035044	11401.326741191	11192.9218823339	33990.1103874915	16548.1576897288	29930.4308340176
ENSGALG00000001645	KCNT1	-3.42541652683148	3.35599314274977	5.22356016722205e-14	3.42970685633e-13	639.53137540761	412.100852826107	359.49958822982	60.2223482775303	49.0796926490353	35.5361343441181
ENSGALG00000001647	PSKH1	-1.04495038595219	3.56434843134937	0.00763603989089011	0.0133487277017102	284.675109247831	502.463801150772	412.550954315283	141.839688786725	225.297835635626	297.468958838837
ENSGALG00000001653	MANEAL	-1.42919366843286	2.95509465594558	0.000244333956769949	0.000548232324249675	367.785108382875	245.379553446251	236.600891788463	119.406380205448	85.6041150855267	162.313694706918
ENSGALG00000001654	C1QBP	1.75537478825973	7.75785852677249	3.71834399956893e-11	1.88879343034403e-10	2587.52705198519	2279.11477834033	2618.14977747928	9341.52265140674	6364.81480277587	14081.646333446
ENSGALG00000001658	RPL19	1.71771007182527	10.3013844943861	2.37560092479615e-11	1.22407129236874e-10	16518.6807136	13571.1137695203	14454.3915835008	61922.0721418461	40724.7310166879	66326.7540992015
ENSGALG00000001663	MAK16	1.62951975905714	5.99580275944172	3.4648141212345e-10	1.59340602253582e-09	930.921950891965	703.649381485241	722.343358675732	2639.40016071521	2400.33938699817	3295.25613336944
ENSGALG00000001664	PTPN9	-1.45434169575956	4.63560378843483	4.49411381185879e-05	0.000112846329963429	783.928843957506	1091.16712029018	875.917689779345	520.574174179915	176.126090626925	486.578512441292
ENSGALG00000001690	GABRB2	-1.45466323150714	3.33622961545729	0.00129091007197896	0.00256961433058036	378.754407210359	334.776905210903	399.793218137729	168.265269646211	186.16583390694	80.774322643623
ENSGALG00000001692	CAMSAP1	-1.04906820702712	7.75091381067729	0.000206767298598494	0.0004683782547074	7765.24187837544	5873.8242482925	8336.38523989627	3728.10876512597	4282.5014111321	3778.15635151705
ENSGALG00000001696	SAG	-1.14119501424463	0.880049646683329	0.0128003800627604	0.0214006606293195	44.9305846467264	61.8464646842896	78.1231609071693	27.5492041207579	26.1328690905839	43.1197325131793
ENSGALG00000001698	GABRA1	-2.72888877324311	6.70050104496201	6.3217545379041e-07	2.03904256897427e-06	3850.8154017812	5435.86248528703	4388.91911660534	490.041903602572	1351.78204659475	251.726006022885
ENSGALG00000001701	Uncharacterised	-3.34480045336441	2.55971136829493	2.71141780311776e-08	1.01610499746646e-07	319.5886963193	218.979422444836	266.289514674841	19.6645635165985	50.1627332413703	12.4597961953511
ENSGALG00000001714	PUSL1	-2.22004045072775	1.47565165976225	0.000160047353713818	0.000368845882242635	154.997957412239	87.2181937259983	97.1873016467408	18.0284217478083	44.2456914666717	14.2542922312276
ENSGALG00000001716	C10H15ORF59	-4.98279757579043	3.25576056953611	4.11280160636516e-26	7.11187584161945e-25	476.647853997037	423.757082648537	493.66731631924	23.0363166777551	14.1920142440268	11.8785768593563
ENSGALG00000001717	SLC16A1	1.43780845439548	6.52717541027757	2.65883573506108e-06	7.87321686852313e-06	1655.49733145982	989.560038157479	1116.99500344164	3950.81466342191	2176.96379282754	6026.86528565206
ENSGALG00000001718	CCNG1	2.72265147601663	7.76336774913218	1.27641331737923e-23	1.83215041432908e-22	1553.89242519278	1455.29426664253	1317.3528515926	12580.6007517443	8858.19153601828	10928.7039714243
ENSGALG00000001720	Uncharacterised	1.28681955972954	5.70789118432657	5.26194000174961e-06	1.49626187945175e-05	841.417483095013	658.981908151987	796.273232810229	2102.31429159165	1300.65636424669	3247.60291334802
ENSGALG00000001725	TNRC6C	-1.43935115239662	7.53021494199824	6.83314319385744e-06	1.91278974630923e-05	7814.74257332202	7464.76818257863	5169.23248229493	2574.08760542252	3374.99311778831	2269.43502058759
ENSGALG00000001727	LZTS1	-2.02921176667316	0.444526850722926	0.000701578482265452	0.00146030059797343	47.5849889358545	55.8293112389747	54.7737142734981	9.69091041399981	3.3132034652298	35.0552645096273
ENSGALG00000001729	CD276	-2.39847881768227	4.54520538029122	1.06555724519889e-11	5.6643229431154e-11	850.157140864529	1146.36839896951	967.525300465713	128.562952563537	232.820106443384	276.199367719554
ENSGALG00000001730	DGKD	-1.83494909300764	6.71268632133743	2.26220058306462e-10	1.06207314453756e-09	4578.10807477397	4145.24204943821	3676.75973335877	1005.4576824139	914.633836100985	2220.95867182133
ENSGALG00000001740	MGAT5B	-2.09052809205675	3.42002491777422	0.00334572508358675	0.00621576576321768	416.364856194649	507.917749507459	381.293117151754	258.650061384989	10.2597722695296	89.4568742804437
ENSGALG00000001741	NPTN	-1.64584044579466	7.80931944696589	1.23551727345113e-07	4.32023875501774e-07	10118.5233828118	8677.68033461173	6941.56461406369	3130.00500244039	3457.73638828657	2409.51272566268
ENSGALG00000001749	ACSBG2	6.65863839552992	8.7896362966305	1.22156935114118e-82	7.04420621921105e-80	223.089033325473	240.378956637444	192.844428845305	24036.3002749075	16011.4055405019	38589.2052685472
ENSGALG00000001753	SFMBT1	-2.55098071099928	2.57864131999039	1.33510331614758e-07	4.65373857610127e-07	256.577260162097	297.176534888128	211.43804539636	48.5936508233704	62.0978971313397	30.0536772226449
ENSGALG00000001758	QSOX2	-1.43681399426693	5.59442952139247	5.06883606179428e-08	1.84085357852074e-07	1967.75325876597	1504.04287521322	1862.93525225391	790.857445776243	632.886484395288	818.193283494722
ENSGALG00000001764	Uncharacterised	-4.06576713124243	1.47754616575484	6.76869122972541e-13	4.00058608644599e-12	181.285796464072	101.013748442779	108.095049420143	3.49619452809562	10.571902269818	12.1484127058426
ENSGALG00000001765	CAAP1	-2.39139125739368	3.32906342228117	3.31641782539486e-07	1.11102929068482e-06	534.169678133687	474.455415297145	263.015463264904	45.3139941904226	101.997557590786	128.751227351961
ENSGALG00000001768	TENM2	-5.85847671426188	8.91930658639276	2.12244033436816e-46	1.16804672841182e-44	19282.7732357959	27471.5847026334	25287.9750217156	377.945506145993	609.629437602283	353.557382054241
ENSGALG00000001773	RFX2	-2.47940836193967	1.41664295084514	3.1422757840566e-05	8.07987664287374e-05	110.226397467865	117.13240007713	107.849876468946	19.7280106426392	35.383034235351	7.68348850683635
ENSGALG00000001774	NEO1	-1.37244787256398	8.31552719774039	6.79947119611121e-08	2.44261610167993e-07	9695.62029000285	13247.8783047071	11843.0439750323	5086.46939152567	4301.01220218667	5976.31734700101
ENSGALG00000001779	KIAA0895L	-2.25659386676337	3.50910710289095	2.67001312300339e-09	1.12742387935033e-08	363.849636452902	614.04704222259	440.694753835314	94.3351535044133	97.4043302467219	150.336364708112
ENSGALG00000001780	PROC	-2.42895952422209	0.496380495506429	8.44923733581089e-07	2.67579357174928e-06	58.2699088015937	58.1454624839989	56.3244589089066	8.01263188791481	10.0178924075483	19.0057229749701
ENSGALG00000001790	METTL23	1.5205615260084	2.654080514391	0.000112081985359549	0.00026517006275842	70.9600712201339	92.6528995029793	79.2470759701674	214.081020963814	250.699062202388	331.522644362475
ENSGALG00000001797	GPSM1	1.62454483230815	5.0606558367826	4.18289120463259e-09	1.7197050851532e-08	370.728320454854	452.910445041226	410.390890781186	1206.41373445496	1303.0870187638	1857.03860325536
ENSGALG00000001798	BBS4	-2.71835326859059	6.20199048122632	1.9907565181973e-22	2.64298335343852e-21	3348.57022750061	3685.54250148221	2637.35742997158	647.170828697462	450.574998836843	570.183067843575
ENSGALG00000001801	IFT74	1.02531107462635	5.07674976332099	0.00199606297517107	0.00384569773964176	694.896746272345	644.465191345626	340.94384820163	931.010173729574	1284.02426003835	1688.01487067189
ENSGALG00000001812	ATCAY	-5.95910953774096	5.64595312692026	2.4315464706155e-36	7.80862005805649e-35	2686.9340855864	2768.98606625173	1998.97052085142	29.8188311870682	70.1105290192546	27.5492041207579
ENSGALG00000001816	MAGI3	-1.58683549192771	5.90317256559695	3.2969464852787e-09	1.37291683624023e-08	2561.27512335896	1948.72477254637	2280.92248225581	692.534628193251	812.636278510199	1075.69573819864
ENSGALG00000001828	Uncharacterised	-3.61126451252208	2.50812909428571	6.85247261407151e-14	4.44205006258214e-13	249.919257625158	282.998718434526	256.665985085011	16.6130615938015	13.6966584136843	47.0613671043727
ENSGALG00000001840	TEK	3.64003698706438	0.766469617312149	1.92685229852527e-08	7.34152313569107e-08	9.01421087390416	7.51341930566124	1.18785768593563	51.2775197454025	59.026454339817	160.138167486107
ENSGALG00000001845	PHTF1	-1.62605634355613	6.26709201799635	2.39965497352734e-08	9.04165452099237e-08	3828.33300826471	2213.05154181523	2759.89848653642	934.473193928064	1110.31640850327	1154.59767072943
ENSGALG00000001857	C1QTNF12	-3.04689647747117	0.20255088628732	4.33222056886951e-07	1.43144597421316e-06	29.9243357861281	55.1790065655073	62.2989809767555	3.42416460342107	9.60436063354544	6.54810281987314
ENSGALG00000001860	RSBN1	-1.11471160361485	5.16621632676018	4.65624958086372e-05	0.000116630478169963	1319.7000803576	1250.96146844983	1141.95847932855	677.72864185687	608.746487992092	638.738803273448
ENSGALG00000001864	C9orf72	-1.11997505436503	4.38800754584796	0.00729204095333146	0.0128030631670685	1075.18768547422	713.603995072427	377.607262612684	219.730122772426	352.811223797638	586.648737531114
ENSGALG00000001866	MCHR2	5.11547414926617	2.42910326923377	2.85985203342763e-20	3.17142286951093e-19	12.0048551697674	5.12988613476482	5.01627332413703	373.793885860533	239.691522239475	264.1199174225
ENSGALG00000001869	LINGO2	-7.27939779214676	1.41521187380716	6.8482407008084e-25	1.07489013508665e-23	137.947516413768	133.942809100024	122.128537522018	0	0	2.56494306738241
ENSGALG00000001889	CARD9	-3.12224148955291	3.800546424071	7.34705100519767e-18	6.74819511647761e-17	729.022113945876	607.891506969631	548.445883438982	69.5671954240436	79.8971740798249	96.0436063354544
ENSGALG00000001892	CYGB	-1.93610091845053	3.90946101585314	1.7534409515652e-08	6.72135472271943e-08	612.925464012371	593.549487153108	590.420604258562	230.844876064417	121.226605333312	185.858626580654
ENSGALG00000001900	PHF24	-1.6003876665941	2.93835764319481	0.00236903471424459	0.00451184770462751	257.960729494369	356.35730578069	251.726006022885	31.7157068094539	114.857720127966	186.293691394019
ENSGALG00000001912	Uncharacterised	-4.40528146748364	6.0576393557144	5.24222017194768e-20	5.72243342720511e-19	3637.89740482232	3953.23225769997	2036.97145620149	205.499379666864	205.11007898161	73.1223240329077
ENSGALG00000001918	DNAJB5	2.14567328436207	3.93534229320152	3.21032685440816e-09	1.33936977257047e-08	133.377039503885	107.849876468946	182.743677531816	681.408756080793	469.653234980372	1066.24940916934
ENSGALG00000001933	CORO2A	-2.84843084281557	0.548244155376416	2.08203235951101e-06	6.2673615942339e-06	81.1278978651374	52.5939351396287	53.4535958671035	5.82699088015937	2.64297556745449	23.1924242566086
ENSGALG00000001934	OPN4	-2.67229433689591	2.3828017928136	8.39089939927167e-08	2.98921565223046e-07	280.781497480528	160.392822580209	234.640351045454	32.4892788535105	18.3930021885024	77.8737262209443
ENSGALG00000001936	MYO7B	1.734354766968	4.00573109005649	1.14143808270013e-06	3.54790093528282e-06	153.896584042945	180.585839668933	224.27633151632	665.429321264828	767.388414620281	622.069767887948
ENSGALG00000001943	RHBDF2	2.63753352135298	6.46312587600717	1.3285796227789e-18	1.29280642237099e-17	587.360680720065	585.859584119079	673.684704596726	3928.19278305023	2564.58045633237	7293.44619164478
ENSGALG00000001949	MDH2	1.16569868169565	7.90057657807315	8.89020416889635e-05	0.000213955321887266	3044.70785370758	4168.00995925909	3936.20541493815	6581.75531175924	10746.5484846597	10633.0929581148
ENSGALG00000001950	PMPCA	1.58294250883202	7.22469843653228	3.66894020235457e-09	1.517815156077e-08	1398.33081522029	2082.31452344516	2181.62538553167	6245.35126589497	5132.15216764096	8212.94768511268
ENSGALG00000001955	AANAT	7.68284621022481	6.94313630847465	2.41211802365603e-65	4.26558951303332e-63	18.6896942930266	36.5244224364914	34.5756982807636	9995.67895453635	3602.03504762736	8004.30013421465
ENSGALG00000001956	OLFML3	-4.60516652977833	0.693655974709558	1.07894736259409e-13	6.83058657283312e-13	66.264069304596	95.1500036689883	65.9511250163597	1.18785768593563	4.6615927041275	4.40495927909082
ENSGALG00000001959	HENMT1	1.30985852162591	1.15786207450519	0.00337833495167462	0.00627107858139405	41.0390890781186	24.2453210666623	28.03454143954	81.0385622809653	68.1909604981727	120.048551697674
ENSGALG00000001964	INPP5E	-1.55534154291507	6.56231153057198	5.14461860508519e-07	1.68227506309775e-06	2692.90272950756	3614.37921300143	4356.67876375274	1456.98150810884	1450.4047746019	1084.97091750276
ENSGALG00000001968	SYT6	-2.9872065413544	1.83076280154906	7.83323805819381e-11	3.85356959813889e-10	144.065409503182	194.260383656236	132.522058481424	24.2453210666623	20.7663269922518	21.6863758216668
ENSGALG00000001977	LDB3	2.05028015567817	2.75205307070774	6.36464716556402e-07	2.05038414760446e-06	73.4200850900081	54.6214950607262	67.3684704596726	281.443695063008	198.688199416375	481.082362803931
ENSGALG00000001983	Uncharacterised	-2.22938075098055	1.07775548444731	3.48699436194377e-06	1.01443312617811e-05	85.1253366583508	89.7730073583843	81.0964187402153	12.4597961953511	23.9691522239475	24.9713376472182
ENSGALG00000001985	PIGQ	-1.22789571209842	3.86783086108027	0.000207512756351621	0.000469826167205795	612.999440592766	445.781879043991	483.727705923551	279.440537091029	204.531969987445	264.892263963646
ENSGALG00000001992	PKLR	2.84236632258762	11.9610422082284	1.33534090384897e-20	1.53206110793676e-19	31144.1125731601	23976.7993455991	18776.0348448474	232327.145503721	178753.433832473	182592.610053161
ENSGALG00000001994	PRR35	-9.1172075078458	3.11455296113171	5.51813925403422e-41	2.25191018234633e-39	379.611573972597	509.987787953931	412.211590796199	2.28277640228071	0	0
ENSGALG00000001998	R3HDM4	-2.01464990324911	4.49107612015292	1.46359978498461e-09	6.31892055607125e-09	896.849709222892	1016.04906267047	809.275820679395	202.862321252853	289.837275368294	255.22220055098
ENSGALG00000002001	STXBP3	-3.69096788565854	3.51083328288872	5.89135294062144e-18	5.47561415917745e-17	562.072804011989	521.277345196155	510.805282854569	29.2188528553493	57.0171689249104	51.2775197454025
ENSGALG00000002003	BMPR1A	-1.41540364113128	4.61436706710733	1.28118106104554e-06	3.96091011949814e-06	754.949135282623	907.488489561405	1027.24938102632	377.451372898336	333.95324381353	437.750283499931
ENSGALG00000002008	RNF157	-2.04405265034101	5.54870533162831	0.00104331134459185	0.00210551405406599	2264.55222520613	1700.55725367454	1733.12243348934	350.950926169056	935.938324935092	95.0831702720999
ENSGALG00000002013	MEAF6	-1.19500411640912	7.39233090010803	5.46112566105163e-06	1.54766900945572e-05	4774.65615902443	5999.39186806155	6916.81249891056	2960.06394725871	2675.99135238816	3096.74126335303
ENSGALG00000002015	SNCG	-3.34867404865964	1.1797011072908	9.26367369818941e-09	3.66758520176377e-08	81.9621803295586	117.705215779219	104.838030842362	3.3132034652298	17.026842761819	12.5223655094354
ENSGALG00000002016	PRKCD	-2.68101868387046	-0.0215733009509977	5.23827229184771e-05	0.00013042088493857	42.7490511230402	36.7860043770049	41.5326539845036	10.2724938102632	9.60436063354544	0
ENSGALG00000002023	PIGO	-1.43900447213123	4.87123940045819	7.67016729048618e-05	0.000186385908343199	1312.028572231	1270.0021542345	650.328182123345	438.319486110248	504.617410221802	363.849636452902
ENSGALG00000002028	GPRC5B	-2.10102620198147	5.95324394908952	2.51886444335212e-14	1.70360525814274e-13	2636.60674463422	2376.11882073914	2588.68331478985	601.906639812406	453.136690280378	1040.39298231182
ENSGALG00000002038	DENND2C	-1.05860816279901	2.07682318932805	0.0225039946736422	0.0358566171740168	152.667161060176	124.219851670361	147.989754780264	77.12158192118	31.7233259572363	138.979349254469
ENSGALG00000002046	Uncharacterised	-2.16466667693431	2.02742324195634	4.91586459523595e-06	1.40213144358311e-05	189.470441389299	118.133635792609	189.894981776321	62.4136146396386	23.4092755126395	41.5326539845036
ENSGALG00000002048	GPRIN2	-2.60715573984295	6.88028839053349	2.58774701240926e-15	1.91204950560356e-14	5085.67348040247	5620.19550241511	4610.09310410181	935.28735277188	1116.60521533381	676.360853204476
ENSGALG00000002055	HES4	1.71793549525877	5.08245175890603	4.05716577961047e-08	1.48811365417516e-07	462.72949152708	274.657216840283	454.949493713347	1290.09578086728	1051.02328399107	2290.52799562887
ENSGALG00000002060	TAF15	-1.24568719228583	7.32380724756137	4.75507582938237e-06	1.35919333459264e-05	5428.44378227029	5524.8812962886	6098.43715869292	2533.63033512929	2897.53549779386	2549.55340897812
ENSGALG00000002067	Uncharacterised	-1.86780305297557	4.24629861123775	4.6657405425398e-07	1.53552647185373e-06	870.109100975351	759.023153758337	619.481260863681	190.9863322463	287.27362354683	193.962568533298
ENSGALG00000002070	SAP130	-1.51950369096434	6.51531918788015	1.63092453501199e-08	6.27894110533062e-08	3837.96818325803	3739.76274688628	2687.0251602454	1380.50144384575	1280.01794409439	1361.59854305928
ENSGALG00000002080	DOCK2	-2.22739539587867	1.93244333352129	0.000907111667023737	0.00185434988281995	149.621678930641	134.603334197677	184.820310231041	13.6966584136843	72.0327047515908	16.3702570496829
ENSGALG00000002081	MMP28	-2.35971929744839	1.19009301019781	1.86888067523902e-06	5.65267146994186e-06	77.6386661584994	129.476487766984	74.5854832660399	22.9057882512723	20.9836219464554	17.026842761819
ENSGALG00000002086	RASL10B	-7.20604235208491	3.06943667747773	1.34246527488755e-34	3.95669265351859e-33	383.604751633921	339.773517489347	530.972385613228	3.49619452809562	3.52396742327266	2.2088023101532
ENSGALG00000002089	Uncharacterised	1.15193616654748	6.72384527633747	1.01996088907471e-05	2.79614329718848e-05	1575.48374496125	1398.33081522029	1987.28590857031	4632.4577497267	3015.63512246558	5102.33333645389
ENSGALG00000002093	NR2E3	-1.43601099029395	7.2530548679587	2.79610414496761e-06	8.23738988776219e-06	3518.0796913281	6756.32448692913	6575.53742676959	2192.67553263843	2383.50942643382	2398.22176800255
ENSGALG00000002098	GRIK3	-6.93554873195109	5.41605405885041	1.93799272648162e-57	2.03996805804173e-55	1725.3517033259	2202.14398929616	2474.3078611268	10.2724938102632	28.8130819006363	18.5529579896406
ENSGALG00000002099	Uncharacterised	1.48285845382376	7.2535844227283	4.23835699106981e-08	1.55028485307664e-07	2076.27323795592	1918.4263960455	2089.44166956078	7438.73655761145	3860.5063121952	8676.17547428177
ENSGALG00000002103	TPPP3	-5.24908825782315	1.68583954744796	5.4032768412128e-21	6.40998754427597e-20	147.056735863258	135.4393797517	184.820310231041	3.42416460342107	2.88130819006363	7.639453289852
ENSGALG00000002106	CLCC1	-1.16465095599971	4.90635462476457	0.000485148614081783	0.00103749211037838	807.275163174935	1160.53695915911	1164.23277785584	429.924025639264	630.613059548739	473.746860372963
ENSGALG00000002107	RANBP1	1.48708519411467	8.10411500701255	3.20509535587062e-08	1.18940066325999e-07	3859.79875901757	2827.98385717631	4259.67525513045	11921.7946702312	8290.64079161353	15560.9356857568
ENSGALG00000002116	TEN1	2.32324356041584	3.50285596836614	4.72134159087996e-09	1.92496629326286e-08	114.034337849821	106.051234018901	63.4314136189079	670.371501131496	405.639489325687	539.296541273018
ENSGALG00000002123	OSCP1	-1.97217565991543	4.30586896104053	2.8943466455244e-10	1.34316723441533e-09	786.597135887372	861.075520813318	731.863755226448	186.438158547093	218.046433418644	287.62982668737
ENSGALG00000002124	ZDHHC8	-1.48012322999999	5.45616080570971	5.29682804154911e-05	0.000131681031518399	1747.33865601132	1892.60663787576	1247.48446783852	627.299856083509	833.31371634314	419.916656749734
ENSGALG00000002125	TMOD1	3.56027639258846	6.79710501421259	3.80282266959625e-18	3.59236731245406e-17	488.209508919545	580.368291663873	246.677719629086	3199.45014625691	4855.65492407637	10366.0141687106
ENSGALG00000002127	LSM10	1.83582528283026	2.88174864250749	2.0487505158829e-05	5.3956668173461e-05	54.6214950607262	108.231313197507	78.1231609071693	248.777661454116	245.886540988676	522.09838286228
ENSGALG00000002129	WDR47	-1.06149576994668	6.58758548261655	5.07328824313287e-05	0.000126455594754127	4147.13178591966	2824.00231718803	2869.30834140638	1607.31370920029	1534.02574233264	2278.15434227698
ENSGALG00000002132	KCNIP1	-3.42487280316068	0.822787851391931	8.3483655258778e-11	4.09938437503581e-10	97.6017368635836	76.4730094764039	63.3887801813999	9.82215422980971	5.98486715722562	9.19650109425122
ENSGALG00000002138	HYAL2	2.7542086498296	6.18206993341923	3.06098079642472e-21	3.72115383162062e-20	469.370490907555	600.94739159361	347.286936795008	4092.16972804825	2647.78465594442	4281.62041927628
ENSGALG00000002145	CAMSAP2	-1.79225933436597	7.44579670033704	4.52653682221439e-09	1.84952119140572e-08	6268.25705414624	7271.37720502433	6934.93289899026	1368.27713799764	2504.00400195231	2798.12102065253
ENSGALG00000002152	GABRP	-5.21668780452339	1.41294880388423	1.18058877156976e-17	1.06013194836356e-16	145.674772003984	82.8132344469075	156.824964020877	3.00473695796805	1.66964873459139	7.12714611561379
ENSGALG00000002157	RPS17	1.16974976077428	9.81587070052316	6.50291705558819e-06	1.82304351951524e-05	13757.2861714905	15348.7530097826	12887.1289515517	35315.4002474787	24220.8054874129	51504.0011882574
ENSGALG00000002160	B2M	2.1326587321235	4.53504138273192	2.72742613229545e-11	1.39883421471904e-10	239.00575292537	259.914230828084	150.488199724111	1042.46961501104	935.938324935092	1274.49865607148
ENSGALG00000002164	DDX59	-1.23494253394469	4.41834059682076	0.00010632596968013	0.000252181927014943	804.124741461993	605.241404947079	855.910895184365	303.478432754773	266.308973167326	564.232400819425
ENSGALG00000002165	UNC13B	-2.81922932986553	6.79861771183132	3.02707316813331e-13	1.84673741623515e-12	5479.58750522107	5863.11822361636	3420.01038428611	532.321356746921	1080.70372588251	641.145114083092
ENSGALG00000002167	PATL2	2.93000595570042	1.2711315154186	1.85317706241041e-09	7.92094340275518e-09	10.0157898598935	15.0268386113225	15.4421499171632	94.3972522585818	94.2661285725436	174.495382502103
ENSGALG00000002169	PLEKHB2	-2.01160993918195	7.67443442517972	2.77017092234265e-13	1.69546732547441e-12	6872.29445406773	8245.27013227359	9650.43724064171	2263.74780132666	2283.10518319577	2340.93803949768
ENSGALG00000002175	KIF14	3.27668872687077	3.4739102472182	2.91181425630099e-14	1.95343411640466e-13	68.755079608668	45.3139941904226	41.8022777011419	393.521896503172	642.601557242021	660.780011587927
ENSGALG00000002183	PRR16	-2.11526148010904	2.81543355053198	2.39596826573811e-05	6.2628551652512e-05	225.732299586166	350.950926169056	281.922885681668	83.5579375118454	91.673439478224	36.7641839658145
ENSGALG00000002192	PTPRC	1.17722096093349	3.19712374058514	0.00208524906342838	0.00400472897889525	128.288630081048	185.298309989068	108.361998265634	409.732828533419	292.46106390889	384.019208956019
ENSGALG00000002193	Uncharacterised	-4.64748673958836	3.15918840791992	3.17816336763966e-17	2.76406431114786e-16	510.752019950105	434.330359410088	347.794950473501	17.651377943414	28.5347050285089	8.6439245701909
ENSGALG00000002194	MRPL38	1.48630514799622	5.89112057029307	3.27994504591691e-09	1.36626605351746e-08	746.398432608281	748.26077085044	864.917519227288	2488.22627848598	2040.92663462841	3072.15157299048
ENSGALG00000002197	NPM1	2.37055873171665	10.4745305100812	2.41549540664639e-19	2.45492073397326e-18	13806.6747957025	10439.3182842464	10663.7610415613	66963.0980192152	53534.5307980861	88283.2829435497
ENSGALG00000002198	FHOD1	-2.77151606762967	2.40335419268858	2.43728908383476e-10	1.13863209295176e-09	213.439593613247	229.544219141736	248.827907155179	34.1992408984321	22.5732299586166	63.3372973263681
ENSGALG00000002199	KLHL17	-4.05449571337373	5.76046014925031	1.09736286583064e-31	2.73064234324798e-30	2658.48702336538	3006.67054479175	2072.47399844499	107.849876468946	151.594187043438	286.488438486229
ENSGALG00000002204	SLC7A4	-1.08735582220941	5.81130914285108	0.000397265602769024	0.000862037272793775	1856.49834168376	2224.50692788235	1694.69346561026	1482.44639204767	666.607756690232	948.828228716163
ENSGALG00000002207	ATP6V1G3	4.28053044468984	0.719241782407213	1.01170699986861e-12	5.89037310766349e-12	3.84174425341818	2.18270093995771	5.12988613476482	86.1126920643523	48.8008684317918	130.118254930001
ENSGALG00000002210	PPIB	1.25877833559409	8.59187122119346	1.44515026901377e-05	3.87333705364143e-05	4033.91979816019	6624.45831052833	6550.4268863445	18158.004213781	13438.8896873196	14768.0872009655
ENSGALG00000002223	LHX9	-8.88666391616271	4.23356224237081	3.58377490264748e-58	4.02810224862827e-56	1244.11313924299	803.884985027754	787.955039324735	0.854981022460803	2.50813666206851	3.11494904883777
ENSGALG00000002227	DMXL1	-1.47619485876019	6.45556482642336	0.00129966546605658	0.00258510244095806	4085.04258193264	3994.98494743726	1695.90932244997	716.756349644713	2052.23534229218	941.681886309542
ENSGALG00000002232	RERE	-1.86275807952186	8.06115766786082	5.30750405030076e-12	2.90881926525368e-11	10567.830660257	9699.72033255799	11439.3871642834	2934.6264289488	2295.76701006316	5065.02517282954
ENSGALG00000002234	UNC13D	4.00734209163359	6.12033958497403	3.55590823740669e-29	7.6561706092086e-28	262.847474908231	235.371061707497	117.710235788693	3018.34637996244	3914.57247329107	4204.09313596428
ENSGALG00000002237	ATP6V0D1	-1.17297205132429	7.48553020971617	2.80367486445444e-05	7.25988670973433e-05	5563.29900122426	7404.18526079749	5824.08428818196	3340.62378860528	3148.89510572314	2762.29451049146
ENSGALG00000002244	AGRP	-4.64035919024471	0.915376298872429	5.66778432247868e-14	3.70852607148667e-13	65.3321727264598	124.697604835411	76.6462914561803	3.3132034652298	5.00789492994675	3.33929746918277
ENSGALG00000002247	SETD6	1.42519980728365	5.50350870737115	2.87542931629727e-06	8.45230918041903e-06	663.465273429583	556.80633897921	639.602871361356	2240.54503883852	979.644784621635	2707.64051601754
ENSGALG00000002260	CISH	-2.27629184961418	5.49309969226171	6.04528380768428e-13	3.59545287629222e-12	1767.98776136575	2012.62532687273	1863.54553991691	405.981692698523	511.34191411088	358.242651631245
ENSGALG00000002262	ETF1	1.29647394504857	7.2318056232851	8.51587865764766e-07	2.69432487205107e-06	1753.13117132095	2334.14035286352	2491.62130035615	5209.30484345281	5591.58304815283	7696.13292834217
ENSGALG00000002266	OGDHL	-1.47027976772071	6.25734179782648	3.32810609810925e-09	1.38502262878014e-08	3109.14145990633	2520.18423024232	2874.61713792431	1188.42362122052	894.568742804437	1461.94942025453
ENSGALG00000002276	EME2	-1.10655708136654	3.75466102656017	0.00106728582692067	0.00215225968107783	394.871925730863	563.04454313349	431.197325131793	207.033086117269	209.836219464554	327.516328418518
ENSGALG00000002282	TMEM200A	-8.09053851886983	1.9689643986775	7.8516857045469e-27	1.42653297944391e-25	245.177056427005	207.326850099796	131.067425665424	1.18785768593563	0	0.880991855818165
ENSGALG00000002283	MAPKAPK3	-5.21198625979513	5.5582249614994	3.20032553712231e-41	1.34322524047004e-39	2650.56277218384	2345.69798518706	1943.47112706437	67.707888098331	87.4048632023906	48.4545520699991
ENSGALG00000002285	SPSB3	-1.06043634208875	5.06047411365897	8.28052316147171e-05	0.000200117672541179	984.02561708488	1201.33201650177	1222.42676342132	661.740447651281	507.477968540168	696.809533305555
ENSGALG00000002286	H3F3B	-1.12828689033507	10.0182146470414	1.12277206918527e-05	3.06153905296141e-05	31320.1414661916	39682.2379030573	36711.8761524537	15688.854334588	16064.5873445935	25157.4504260001
ENSGALG00000002287	CRB1	-3.66366919985339	5.67930222544443	7.77543461996113e-18	7.12193296716467e-17	2152.39324089111	2186.40501794742	2841.35558475803	188.794504517164	296.013263554903	115.962121283043
ENSGALG00000002294	SEMA6A	-5.00712314104929	4.04806561999396	2.59909625744008e-23	3.66721421940721e-22	1116.45153078837	822.491743607293	484.070375779223	41.5326539845036	25.1105404250878	16.3274130770273
ENSGALG00000002303	LRIT1	-1.25842978810668	6.53834818084456	0.000175017575846329	0.000400908136174414	3291.41438911602	3761.88507001712	2865.89638728861	1501.53781502502	1928.15346123058	1036.38048663544
ENSGALG00000002307	LRIT2	2.0881981263631	6.46340742804591	6.75394857174474e-13	3.99365224730497e-12	945.069430544215	873.036381589281	723.565361595982	4785.32878271312	3837.44909296483	3384.91129973705
ENSGALG00000002311	GALK1	-1.27723224278207	4.55739130591148	3.72874701733532e-05	9.48491977194444e-05	1022.05420037995	773.510849408349	722.278355420096	474.748439358952	262.969675698143	463.264497514897
ENSGALG00000002312	TMEM132E	-9.37327680654386	5.37868277681019	3.99098357865414e-72	1.10275865007687e-69	2327.0132067479	2151.32503295484	1804.2713207156	0	10.0157898598935	0
ENSGALG00000002313	SLC38A7	-1.47987819737331	6.07688347010702	6.4780736131632e-07	2.0843932637405e-06	2203.36063140123	2905.67943900653	2406.79430333241	844.842259703241	1179.54268213408	946.303318937882
ENSGALG00000002314	CDHR1	-1.67814295841253	7.2057170541269	1.50364722664036e-05	4.01669147370213e-05	6029.77016278892	5139.70648684317	5851.11731959583	2190.45324235871	2491.95073637764	975.231160153154
ENSGALG00000002321	GOT2	1.84594798851843	8.70052797874467	1.69722897157682e-11	8.84145634329275e-11	4648.87414324467	4466.02769459863	4590.22007673107	16590.9067408519	19907.9167323918	18317.9770398653
ENSGALG00000002335	DOCK3	-4.27108700516223	9.30569697765745	3.30314069786617e-44	1.65319075757732e-42	27728.749585109	36268.8501688073	27105.4633550748	1692.99224689625	1807.70876467552	1772.57587637097
ENSGALG00000002336	EP400	-1.12884103365921	7.38723199425382	2.34584662198601e-05	6.13788986928397e-05	6456.30589521658	5189.04203076899	5741.78160524324	2243.53692861615	2691.47376016131	4266.78480788079
ENSGALG00000002346	CLSPN	2.67954957246368	4.35057658782466	2.63090436723222e-13	1.61171753453122e-12	124.856688236091	171.34202378668	118.842362122052	643.755076597585	1077.77237089787	1297.75838469659
ENSGALG00000002347	DIPK2A	-1.51834656450165	6.19269427634728	9.58098197118513e-06	2.63581339729991e-05	3301.05505252396	2363.72640693487	2537.86607657891	870.699683790818	1413.62798752666	800.821596938712
ENSGALG00000002358	CDO1	-2.34498339947171	1.43342634861487	0.00075715971869317	0.00156934042022621	78.1231609071693	107.692343381144	148.482210741954	32.6311489288925	32.5966986652721	3.3132034652298
ENSGALG00000002363	HSPA9	1.57150547026652	8.86482432471951	5.57094741889472e-10	2.50720989537837e-09	6408.49221562274	6357.24705025387	5005.79572475881	20695.3732449804	16092.3695678909	23817.5391989461
ENSGALG00000002364	SEC16A	-1.0733392901514	6.96626941409301	0.00108692554231633	0.0021895342447967	4718.17072853633	4827.07924512402	3286.09962220175	1856.49834168376	2911.59011227104	1844.12702735619
ENSGALG00000002371	RUSC2	-3.20702737088537	7.64318886175199	2.13400798031923e-24	3.22361592744578e-23	9600.51888929203	11165.6066583537	6548.29965102729	982.353525976835	1185.75727125758	1129.97431912895
ENSGALG00000002375	NOTCH1	-6.73839702687657	5.68096146801436	1.3360298880081e-66	2.56808179777557e-64	2637.32352801598	2811.2391394087	2239.7368997428	24.0097103395348	35.0542219208929	20.0650932965481
ENSGALG00000002377	ENO1	2.98414568338061	12.413752906006	5.00590766606709e-23	6.93765448015129e-22	37869.4739030704	27508.5970356837	27334.9707991337	361142.058072113	193380.462641207	284298.12669102
ENSGALG00000002389	Uncharacterised	-4.4703772173474	2.29350962003854	7.7935618466895e-12	4.19334729300782e-11	114.214798457385	449.7069512493	139.263229186409	15.278906579704	9.40479124706884	10.8685922022969
ENSGALG00000002390	CA6	4.6759980458572	2.60827239031673	3.72149376441486e-16	2.96089812822041e-15	5.93928842967816	20.9771671685737	7.04793484654532	279.41349223438	381.601593661943	305.545718430224
ENSGALG00000002395	Uncharacterised	3.91176018907433	4.25994253738911	2.17033240281615e-08	8.22197048230523e-08	46.0726333555101	43.410867099376	90.2771841311081	618.826431472925	1846.55892979487	259.534271443001
ENSGALG00000002397	PSPH	3.35103403124758	3.16538541494076	1.29961307958774e-08	5.07112923641428e-08	45.4505288652431	35.2396742327266	38.654040427681	417.658437157559	114.37093831951	1007.30331767342
ENSGALG00000002431	Uncharacterised	-3.26996412152306	2.98293647592621	2.93664331466609e-09	1.2306066439942e-08	349.264789548949	549.369428238799	180.072827546511	40.1841080556578	16.7209110804568	78.9120425705569
ENSGALG00000002437	DIPK1B	-1.86787893846767	3.9017988970247	3.60089105895731e-06	1.04596185096257e-05	519.595910274808	619.887066947991	629.266032531151	117.88242311722	242.966025809346	167.784065567632
ENSGALG00000002443	FBXL16	-1.48795729188123	4.53162214521983	1.34087201889683e-06	4.13869806530803e-06	834.618939055099	1032.4175446	708.779267620006	331.910084947067	241.927709459734	503.352196702897
ENSGALG00000002455	LRRTM2	-5.89557271895316	3.61676897951672	4.18260101131975e-20	4.60363794299866e-19	583.533788482276	696.246802695617	538.804631541899	4.36540187991543	23.0844876064417	4.18022777011419
ENSGALG00000002467	MTSS2	-8.03632419912678	8.57472601051782	1.10268476609831e-90	9.14056753297619e-88	17473.5469895702	18321.0555646713	21692.6570605565	102.555039490805	80.170258879453	59.6376623741364
ENSGALG00000002473	GPR157	3.90519003438901	2.97679302476368	1.49733722471773e-19	1.54907828482303e-18	19.2009604478009	29.6964421483908	24.4733616966694	444.900887188173	325.798340747597	498.786335022697
ENSGALG00000002479	MAT1A	2.95432038372076	0.300187692055001	1.07154650642493e-06	3.34083716847998e-06	10.9135046997886	4.27490511230402	4.18022777011419	45.685919382954	31.95886963193	106.608403032354
ENSGALG00000002487	SFSWAP	-1.70932702868129	7.04486846507569	1.32978814921787e-11	6.99880167582405e-11	4612.4046293087	5537.79253183192	5152.22533623692	1585.7853404727	1626.78290142783	2120.34271333946
ENSGALG00000002495	CHCHD2P9	1.93510417222616	5.4647449434993	3.48353317188308e-08	1.28804294560037e-07	288.454747964933	428.26490042269	665.200304123954	2553.38740368584	1178.7671030847	2434.10014578883
ENSGALG00000002499	Uncharacterised	-1.00949734380979	6.69685066616661	0.000385814601650927	0.000838999682193187	4343.57487051585	3130.085523229	3016.4523589144	1542.93809552431	2141.24426533931	2145.61416553405
ENSGALG00000002500	GMPPB	1.69750323316883	5.54242962244309	1.56436609111457e-08	6.03320368317898e-08	449.708964709218	530.948297600061	678.266738669246	2544.06421827758	1236.9125655687	2489.32020354266
ENSGALG00000002504	RO60	-1.22378133367636	4.67001917571675	6.23159981070093e-05	0.000153282099943113	853.82766032219	954.9316612315	883.19539620201	317.697310528678	459.974142878378	525.038572524564
ENSGALG00000002507	MBL2	-4.42125046615192	0.0232011293662847	5.21768986679159e-11	2.60943516980607e-10	61.6349628615792	41.2987507242454	36.0145655093023	5.12988613476482	0.836045554022838	1.03831634961259
ENSGALG00000002514	SFPQ	-1.04064056184328	8.40026147042614	0.000378162185012727	0.000823438689841373	13733.5543142139	10660.7583690638	10027.5303749499	5895.56023310029	7032.09270722574	5490.81297419793
ENSGALG00000002515	OLFM1	-1.31035330546985	7.8363593667025	1.72017334522575e-07	5.92127149694501e-07	8680.32468276126	7857.31637665021	8116.64517140925	4187.51175330887	2699.17508790876	4612.463321544
ENSGALG00000002517	TMEM35B	1.83475289437343	2.170982958038	0.000137478652982977	0.000320115760974934	38.654040427681	48.0757913274888	59.2725300779942	285.085844624552	88.5702613784224	239.629784782541
ENSGALG00000002527	Uncharacterised	-1.11444722707712	5.62265442795674	0.000116568403684604	0.000274706243437971	1529.01421286043	2004.81081335116	1562.90530905835	619.509755530923	903.335224162954	1160.79180055974
ENSGALG00000002529	MCCC2	-3.34406299508824	3.54325856174103	6.87624672109448e-11	3.4029723978312e-10	743.261977366552	460.726333555101	395.706750098158	38.0114459499402	88.5702613784224	41.4066172234537
ENSGALG00000002536	STX2	-1.22977624893025	5.64568938576843	8.1219177066363e-06	2.254520605758e-05	1891.2180216833	1442.1785806894	1972.80106426392	688.257085287635	836.539811181808	1048.78780164968
ENSGALG00000002542	GUSB	1.55671490204192	5.49459260006698	6.8423012040377e-07	2.19413541753269e-06	623.986652618279	633.999498131259	470.840943154771	2546.766878646	1603.58789021986	1528.52086984452
ENSGALG00000002546	COL5A1	-4.78097827009116	5.28725368677792	9.51571659573511e-19	9.34174309468799e-18	2143.16724572262	1514.42500015142	2040.93333458156	29.0457905936912	36.7322721610105	194.808660493444
ENSGALG00000002553	PCDH1	-5.44007964068191	6.02142276773331	7.12020356132901e-13	4.20085675417735e-12	3488.73802359295	3675.66584720453	2444.75239989541	53.0112554436768	156.246321814339	10.852716774844
ENSGALG00000002554	TSPAN2	-3.06148639917778	1.57028856657822	7.64745872223466e-07	2.43408315413963e-06	111.410583349127	178.981477076533	103.452703717757	13.3767288643654	29.0728577891526	6.84832920684214
ENSGALG00000002555	RET	-6.1576111008376	3.66347849265816	7.44137025794738e-30	1.68709220053258e-28	813.282136623353	347.286936795008	723.4053307348	6.99238905619125	12.3338859814543	9.9396103956894
ENSGALG00000002556	NGF	-6.30415895784501	3.14307694178069	1.50765825870309e-33	4.20085535402923e-32	506.570317095445	356.721573089742	450.710543695208	5.00894620377416	3.5635730578069	10.4885835842869
ENSGALG00000002561	Uncharacterised	4.53595350072926	2.85257303082944	7.32959069230984e-20	7.90344401236629e-19	13.6966584136843	16.3274130770273	14.1875561097251	355.672105343694	221.552071816052	664.522463752058
ENSGALG00000002563	TPM4	3.60668897012217	3.29464760634831	3.30557357797949e-18	3.13379716688649e-17	33.2261231876029	44.5141398444739	33.6152622174091	627.526520237843	398.421156466734	520.856380156228
ENSGALG00000002569	RAN	1.09209259684365	8.46358229812723	8.47789970360978e-05	0.000204515066877004	6482.83478029964	5750.06495856486	4833.63308664206	13987.0242518921	14060.5289938246	12316.2661443379
ENSGALG00000002570	Uncharacterised	4.79749758909446	0.357824579083965	1.5899427331251e-11	8.29559813903941e-11	0	4.80218031677272	1.09135046997886	66.6885197519426	35.949958822982	103.831634961259
ENSGALG00000002578	Uncharacterised	-1.51199461025008	4.04429980601126	1.90786196981169e-05	5.03962822258762e-05	644.794453109419	719.074566718424	479.257595613918	303.395430654122	215.455217660122	202.323024073527
ENSGALG00000002579	RIMBP2	-2.38242345731799	5.50272938820012	7.26668270867356e-15	5.15114980038148e-14	2261.82692919995	1957.88274314207	1534.69093531714	320.205447190747	452.70592843109	464.544997864125
ENSGALG00000002591	POLR2E	1.1796489802008	6.51296105645702	2.09308214598273e-06	6.29919412347831e-06	1559.53982159979	1389.34416149881	1282.49387987103	3973.63666996739	2982.44736957975	3961.7987613375
ENSGALG00000002594	TFPI	-2.6779388890172	0.200777542618769	2.32245626081273e-06	6.93911632961461e-06	72.2546869139762	30.8347149536358	39.7584415827576	11.0173688458829	5.84377057106985	8.31500380154943
ENSGALG00000002595	GPX4	2.62710080473555	7.91950863624609	1.07272779154455e-19	1.13007058770892e-18	1915.03160290282	1803.84375376682	1387.47809844544	15127.3676303903	8290.64262429075	12759.4050478145
ENSGALG00000002599	ARHGEF39	3.69798752766744	3.95356632020019	1.48141223958873e-19	1.53379941714796e-18	55.9332326088114	53.4535958671035	57.1045106255618	479.259569565082	820.570058221914	1194.8837302853
ENSGALG00000002605	MRPL17	1.40221556469941	5.29239234111053	6.02298930115554e-06	1.69530787566269e-05	455.704884971608	748.26077085044	421.556437942712	1319.44476051825	1276.41952819819	2435.89424899281
ENSGALG00000002606	CLSTN1	-1.42472384185242	11.6348600474341	2.0554554223725e-08	7.80461072628873e-08	122000.70204349	106763.993674618	122015.165244576	50657.6255808026	45031.9216763321	51878.4380920435
ENSGALG00000002615	DEF6	-2.40137084904416	2.30793611523737	3.57380178802748e-07	1.19393786182893e-06	159.900717840339	301.326485101054	162.313694706918	30.557813159408	37.6191649882753	69.3917809838956
ENSGALG00000002621	SLC25A42	-1.25202004828752	5.58296151590062	2.57610367182681e-06	7.64701499539817e-06	2010.18045284998	1706.37536070483	1389.75098367403	867.623623633191	654.915463204975	929.682656073396
ENSGALG00000002624	BMS1	1.1263030957631	7.41089483997631	2.19067551841893e-05	5.74662369477656e-05	3068.49339749192	2079.14077973087	2942.12467712406	6792.70868297978	4787.7177464408	9009.90054782177
ENSGALG00000002632	CALCRL	-3.04283333360528	2.13832001186493	3.42583839662028e-10	1.57602825717568e-09	210.250810410607	222.591051622088	154.173574768179	35.3408369624512	25.0394746497338	18.3661360805052
ENSGALG00000002639	TRPC1	-2.99888179420086	6.03788644775291	8.8249679245542e-25	1.37538836173164e-23	3219.81900014865	3119.41395371659	2497.13376472182	506.38661807019	348.832257164008	390.433273728665
ENSGALG00000002644	RPL10A	1.41917965317773	9.66389100605117	7.08355631335087e-08	2.5405410325574e-07	9358.69393173165	11108.9466245051	12944.4835891328	38748.7929760391	26107.2859428342	37390.8850552783
ENSGALG00000002645	PIWIL1	2.75407013588194	2.43780240560375	2.48828278000813e-10	1.16163655442618e-09	24.6677719629086	44.176046203064	35.0552645096273	242.099066515751	247.074398674612	309.995914824479
ENSGALG00000002647	PLS1	-1.26990966648918	7.63486454672997	3.87570957318217e-06	1.12136858789518e-05	7512.15664270146	5434.83875854226	8311.72309310649	3077.85222394527	3295.0517777161	3543.37947714599
ENSGALG00000002653	NCBP3	-1.86134407398901	5.95919560296731	6.96971951687114e-08	2.50174262387719e-07	3249.14819823536	2085.28744882983	2046.98934860904	685.39388478486	939.310929881691	578.811649272534
ENSGALG00000002659	WDR5B	1.14170497936189	7.02515362005603	1.45943898589807e-05	3.90841254304511e-05	2130.24718852038	2165.23933243805	1851.8888946501	3968.70824494641	4241.52228816743	7622.1904072153
ENSGALG00000002667	OLFML2B	-3.31855490506812	4.70464752693029	4.00263679937634e-07	1.32690036461035e-06	811.449285011414	1614.29859518652	1154.90959244759	48.4545520699991	261.743073753154	51.0805282854569
ENSGALG00000002671	Uncharacterised	-4.10253641202139	6.97517229748221	4.62781708403485e-22	6.00574735670785e-21	6534.38757301072	4841.05024772081	6614.25851775376	330.521065376486	551.818906782453	228.068675699641
ENSGALG00000002675	SCUBE3	-3.71726093832255	1.22030103869312	1.81210402324692e-12	1.03105687088477e-11	82.6476123622736	127.100772395113	110.712826723028	5.28595113490899	7.7308080855362	15.0236847898403
ENSGALG00000002692	Uncharacterised	5.18180237772863	1.26510835514651	4.01017835750936e-16	3.18104040404585e-15	5.12988613476482	0.836045554022838	3.11494904883777	142.673525142545	131.579740679573	103.678294647991
ENSGALG00000002699	VAV2	1.12137386916841	8.0080273570806	3.6034681995689e-05	9.19622834921729e-05	5300.68923268731	3372.90013360787	3599.17611006832	10823.4096283616	8458.82795865118	11110.3243808854
ENSGALG00000002705	CISD1	1.39180823640669	7.17141909146453	5.2652025517506e-08	1.91007607888042e-07	2253.10030905106	1704.77401245432	2060.46968732008	5194.86469247184	5268.75908145192	7678.34940538511
ENSGALG00000002707	CHRNB2	-1.39624240942088	4.9212756896296	7.61585043475742e-06	2.11936685514452e-05	1126.08908626698	1326.22312432427	866.895986125074	615.151443377666	303.478432754773	537.626892538426
ENSGALG00000002708	LINGO1	1.62089134909155	6.4984775507135	6.0184854092797e-11	2.99075204133671e-10	1175.8537295515	1017.65090373345	1161.72481684505	3871.45274077789	2959.25164369322	5145.40498150188
ENSGALG00000002709	MYO1C	1.22310840440543	5.52034154866202	0.000164050195614849	0.000377546025410332	733.035452724049	582.335616695807	764.245599313007	1755.76796243933	919.976452759854	3202.46432128246
ENSGALG00000002714	TMEM132C	-2.34742364217253	5.63544426575261	2.2247439748558e-10	1.04559813389484e-09	2048.31160735595	1883.50585819724	2348.97691794685	355.361343441181	636.257323997673	331.732636714792
ENSGALG00000002722	MST1	3.60116063884452	3.61257813318115	3.55462890667562e-18	3.36030243686662e-17	54.6414535530391	55.93911244953	29.0727312419994	747.679581986858	426.672648031463	798.092095134682
ENSGALG00000002723	ANKS1A	-1.16237792548492	4.76021220952446	0.000202766756680198	0.000459944500401825	978.542669311596	824.806474888145	1025.12118296245	410.22015796322	539.167015760717	448.3868689611
ENSGALG00000002725	UAP1	1.58423868564129	5.82825956161561	1.62887846068207e-09	7.00285738218031e-09	796.273232810229	741.16844963212	611.091436860447	2733.26053533789	1832.00593272211	2841.19873501358
ENSGALG00000002726	KIF1B	-1.16368372813017	8.67155117628524	0.000402132778775538	0.000871342435043288	13193.2121575927	13822.3411446596	15652.6189704098	6110.99242890547	9164.48091652906	5278.86222328773
ENSGALG00000002739	INPP5K	-1.04756370764837	7.01557137881413	0.000117768013947924	0.000277188494940783	4459.56872158608	4455.97953725195	4280.6635343712	2632.337333589	2381.9771285758	2070.88483731457
ENSGALG00000002744	PCDH15	-3.78414257326045	7.02049294571221	9.79087371261525e-19	9.58349505907129e-18	4067.36162032111	5887.25370230339	8351.53746774399	560.894660999054	591.51195472854	275.303889232379
ENSGALG00000002761	SIRT1	-1.17746588652253	5.53381428577354	0.000227956840159293	0.000513396429110664	1874.94010742368	1482.53709294703	1499.86572391697	609.491697222591	1003.28022880237	739.535768782999
ENSGALG00000002762	UHRF1BP1	-1.34941178322744	5.30195143471073	5.89380942689453e-06	1.66035672108968e-05	1613.53008756691	1490.34953115215	1179.60683098881	680.642454041117	639.803598641499	542.690983183989
ENSGALG00000002763	FRZB	-5.12862205264736	1.94294610301608	1.18050956513765e-19	1.2367376273634e-18	146.094264276746	205.499379666864	207.440875333674	4.40495927909082	2.2088023101532	12.0189478318722
ENSGALG00000002765	NBR1	-1.57191170409901	7.47418305370332	1.79656389400822e-09	7.69135794907393e-09	6507.12856302211	6972.74052076644	6657.7427911737	2511.19743142135	2539.29363670859	2528.20175536506
ENSGALG00000002775	FA2H	-1.84015018754093	0.281502345072459	0.000216625099722167	0.000489538029922491	36.0145655093023	51.2988613476482	49.3266876873474	14.5364288945763	7.98971740798249	22.0900294571545
ENSGALG00000002781	BRCA1	4.20943294788279	5.18188490284859	2.07150770306277e-38	7.32650844419242e-37	97.8934467866774	84.5752181585438	98.2917028018174	1527.40795363376	1577.81805418886	2987.46208012812
ENSGALG00000002783	SLC43A2	2.15766445839472	6.74723338576492	1.0665757249932e-13	6.75548894010737e-13	715.654994243549	1050.77614580794	1207.5887168065	4441.05635695141	5012.57270861289	5496.6729934005
ENSGALG00000002800	GRK7	-1.32676312818444	1.9703702274661	0.00665995610805675	0.011775896261986	204.322113141828	121.884357625171	91.4650418170437	52.4429179214343	77.5272833119985	51.9068542886002
ENSGALG00000002803	MTA1	-1.43340577623047	7.66256206684839	1.94011515148904e-07	6.65246826633896e-07	6421.66590044942	7602.55231186339	8350.39607954285	2955.26176694193	3265.32060617674	3000.98338883742
ENSGALG00000002804	RND2	-6.17422416611545	2.68302447986381	9.00131395720668e-29	1.84519979929571e-27	372.092553571756	294.853871449845	284.842472664482	2.56494306738241	5.85231887815987	6.22989809767555
ENSGALG00000002813	RPS10	1.21283583531349	9.98683260947488	2.42474332062597e-05	6.3305847758784e-05	16098.0566843936	15853.8821138395	14352.7565307703	53125.8495281008	22845.9479011751	49350.9330084141
ENSGALG00000002816	STK10	2.05436875228128	4.36390511893559	1.65093826673418e-09	7.09309822860232e-09	171.182179036873	241.380535623434	189.505131376122	1175.97910907628	552.398735439108	1197.26793205689
ENSGALG00000002818	VAT1	-2.32146367043029	4.03208851339074	7.41267150940204e-07	2.36389185451309e-06	532.119080914171	838.240476703139	687.083184388695	83.4824367295693	78.3986072717517	349.619452809562
ENSGALG00000002830	NUDT3	-1.38888877205724	4.52603473973787	3.6565958721899e-06	1.06074871069236e-05	940.783287261021	893.860401016448	683.649680114896	404.210822758036	298.470537824827	391.53262826168
ENSGALG00000002831	SH3PXD2B	-2.36599850499653	4.67034107271663	3.29798718079821e-08	1.22318803073061e-07	1022.86440747259	1161.1969000575	1038.80194228988	198.978841857435	84.1036243186199	494.221091093774
ENSGALG00000002837	RPL27	1.11915226038129	9.49018404773001	2.71344409862726e-05	7.03448183739121e-05	14211.5658200647	9984.46838029726	10132.8721147568	31203.4829385576	19964.021026146	35261.4496299987
ENSGALG00000002840	GRM4	-2.31660302994021	3.90934652624416	8.97819664791948e-08	3.18730787316264e-07	507.003746319256	713.146857581481	667.637412800896	195.177382395001	50.9031113577909	207.356589295983
ENSGALG00000002843	RILP	-1.65804348103061	1.63712338734003	0.000173094170979793	0.000396844942040622	106.01764678514	112.866149793083	131.866176400799	35.383034235351	24.9713376472182	72.0291310186045
ENSGALG00000002846	NEURL1B	-3.03891116333737	4.28897996222985	2.94813896893741e-15	2.16387200581167e-14	1042.08742764115	809.647601407881	781.406936504861	122.262286211895	56.851097673553	206.624953572906
ENSGALG00000002849	DCXR	1.19106347211282	4.20745814620905	0.000326653227824329	0.000718474587169831	251.272556606247	310.457590710177	286.209946879654	975.667320161098	516.408537566325	714.818948689526
ENSGALG00000002854	PDZD2	-3.84326745024033	6.84230419432636	3.53374875858691e-09	1.46554439603309e-08	5588.77745266009	6860.22905428709	3792.69581563612	185.60211299307	816.116650795497	130.118254930001
ENSGALG00000002855	SARDH	-1.46196882045754	3.11283412272797	0.000153427226668571	0.000354636686529324	338.533697264401	327.251151979912	288.649417682359	165.486540996526	77.5272833119985	160.138167486107
ENSGALG00000002861	TMEM170A	-1.52088076444271	4.46922100760388	1.51532099185425e-06	4.63721788531677e-06	675.372913142216	1016.8061791609	787.809166997547	277.512434582722	323.589538437444	376.593698731996
ENSGALG00000002864	LRRTM3	-8.6976287709694	4.20506345369151	2.16479399330399e-58	2.47514333906817e-56	971.734016967436	942.05418528034	864.36266490881	0	5.93928842967816	1.16539817603187
ENSGALG00000002866	KANSL1L	-1.50620342071794	6.26557264918053	8.32478058172153e-09	3.31965017604849e-08	3037.35210293741	3286.42285640989	2287.93584955977	1260.1217179424	870.372138824746	1355.75477248821
ENSGALG00000002868	RPL26L1	1.5678896836404	9.7590706148795	5.87565212924005e-09	2.37732685143718e-08	9204.86154979145	11619.7982685145	12255.085115644	43121.6583724923	24778.0210704	46053.5527748512
ENSGALG00000002877	LRRC45	-1.65543302327052	4.66146342216621	1.55500620068092e-07	5.37784804162478e-07	848.586237333181	970.825786887773	1080.89462647992	283.328638689591	385.246715902536	357.382067388616
ENSGALG00000002878	CREBRF	-1.01245886492508	4.19248675844376	0.00418437555071307	0.00765375436892945	648.93059604775	564.330748965416	631.296340564455	293.336767693072	190.1663405442	622.069767887948
ENSGALG00000002882	BNIP1	-1.11923596055774	4.10136516266822	0.000847520385157814	0.00173950214613867	641.010551033184	448.300685237787	683.018169412989	326.311489288925	296.894255410721	289.353102630069
ENSGALG00000002891	ACADL	1.06023697790718	6.2951714545404	2.03568571536244e-05	5.3655205967512e-05	1190.13358326544	1157.92309232163	1500.36712519019	2951.62988814896	2551.87862033302	3705.13484557822
ENSGALG00000002892	Uncharacterised	-1.67624292451495	2.32461696582876	0.00019182754812796	0.000436849033451432	237.741227910502	157.697542191451	175.599783657179	59.0931601733717	35.8974477937148	119.973626279499
ENSGALG00000002893	STC2	6.43450187394204	6.55770180854162	4.50760998883456e-54	3.85706008270405e-52	82.830086630745	53.0836862574356	26.7143797534622	6433.43722702738	3788.70947027962	5970.4818068797
ENSGALG00000002900	NOTUM	2.79605860171622	2.80150200925628	1.24578834864987e-10	5.98005460301964e-10	43.6540187991543	41.8940701005794	45.1464599172333	304.226690436489	207.732652607545	577.222074076081
ENSGALG00000002907	MYL1	6.74795313355309	1.62997806186144	2.53022392489611e-17	2.21800131631838e-16	1.00157898598935	1.66964873459139	1.18785768593563	272.703173191459	139.19671321927	83.9344877858216
ENSGALG00000002908	TRAIP	3.37951705247973	4.35928126239491	5.61969722773633e-17	4.79318613064096e-16	47.0742123414995	89.3262073006391	134.227918510726	1059.34694201297	786.725727245621	1439.03470506481
ENSGALG00000002913	BRI3BP	1.23420617684521	6.05827138849033	4.15286216415729e-05	0.000104713708903457	1276.68773526855	841.326348231055	888.253126802617	2949.45063417817	2673.42341581712	2199.83666397796
ENSGALG00000002922	NOTCH2	-1.87101667726702	6.03066915559148	1.17017938002924e-12	6.77733149228287e-12	2564.04220413274	2420.99066515751	2780.77484277532	700.404303795156	613.170331649443	1169.56082322612
ENSGALG00000002929	TRIP12	-1.22624508676744	8.11154745130354	1.6379126520664e-06	4.99279142825939e-06	9957.45379278475	10425.439829216	8950.303674401	4675.34541338942	4532.25440006472	4891.70253658763
ENSGALG00000002932	NME2	1.9189275931816	8.86586332367234	1.50690754814715e-12	8.62213753713361e-12	4204.7890853662	5745.96022443868	4819.52802361155	19145.443187123	15211.3345218245	31279.7436522515
ENSGALG00000002942	JMJD1C	-1.45577977132409	8.09322878698775	1.92513088983428e-08	7.34127319991687e-08	11164.674390109	11135.3795719846	8004.69200196384	4162.48795348371	3558.61013722016	4899.58421165842
ENSGALG00000002944	CPS1	1.01377110675544	1.64010881683695	0.0274954375022067	0.0429885639033087	51.8635474211454	72.0291310186045	28.2143737412065	112.866149793083	83.0653079690073	163.218512763071
ENSGALG00000002954	MBTD1	-1.36396996413044	7.41604466189231	1.94097936290155e-06	5.86405678591418e-06	5600.46522743607	6910.23802731429	6105.62549859108	1811.56887703165	2437.48397153992	4181.44865560236
ENSGALG00000002958	DNER	-3.50615685578782	5.33786194563106	1.29485552557996e-14	8.97265874386994e-14	2447.33616966694	1328.53571857379	1844.34992897792	163.257374716264	262.134851330848	97.4043302467219
ENSGALG00000002963	PID1	-2.85106529819942	2.11132088535961	5.17306134593634e-06	1.47295647555075e-05	187.187664987018	179.6015438473	200.80848647611	13.6796963593729	8.36045554022838	77.8737262209443
ENSGALG00000002964	DHX37	1.27826570895348	7.05041555997658	1.08091455952623e-06	3.36766967418286e-06	2073.58146078246	2173.97013619788	1609.07428427123	4401.77984193024	4995.33995798618	6855.17753604898
ENSGALG00000002967	ZNF365	2.16757024163585	6.23310489419831	3.30887185738514e-15	2.41262053020886e-14	764.245599313007	700.103711206556	606.917315023969	4309.54768457447	2806.27880788475	3420.01038428611
ENSGALG00000002968	ZNF341	-1.51620408216147	4.95377987202546	5.45095032634598e-06	1.54511549857505e-05	1074.72795489374	1473.32313447146	922.524523235207	321.04149274477	531.617971001647	498.786643898336
ENSGALG00000002969	MAU2	-1.18306246749965	6.47916414807706	1.61459863642859e-06	4.9273864967677e-06	3537.16203533396	2849.61379997293	2984.84353539217	1444.0629469363	1297.54269984344	2016.41035094765
ENSGALG00000002973	BECN1	-1.09393231694532	5.91853611666032	3.266398350186e-05	8.38278663283996e-05	2385.50134038334	1800.81761878977	2044.0994302704	949.028934931492	867.815285075706	1588.62401490726
ENSGALG00000002974	SPHKAP	-6.62716809798518	3.19410092654611	8.36073390257585e-29	1.71920021317618e-27	533.00007276999	530.112554436768	301.475274782795	4.17412183647846	8.31500380154943	2.33079635206375
ENSGALG00000002980	RTKN2	2.84062848952016	3.94363583246509	4.32833927732835e-12	2.39294555378099e-11	117.865850757717	79.5132350888547	86.1126920643523	428.82465239	817.233952016495	1078.56969914715
ENSGALG00000002987	SERPINF2	4.12783409904798	1.62616361577073	1.17906835662672e-15	8.96673372358957e-15	11.6539817603187	7.04793484654532	5.522005775383	188.296849365998	124.388830727058	178.178652890345
ENSGALG00000002988	Uncharacterised	4.8317637556466	7.87195756420786	1.66810680042929e-10	7.93547363489728e-10	803.656854600145	232.843193032633	167.115875023691	18615.1649664294	1671.48789891087	22042.3410318121
ENSGALG00000002990	PRELID1	1.82336980530529	7.67591402817425	3.86574217950149e-11	1.95916463609967e-10	2105.8745040896	2056.2349914796	2653.87597564907	9992.75354321575	5705.18972609877	12668.5022205035
ENSGALG00000002993	CA10	-5.46038584033688	6.86022699877584	1.32373936096018e-68	2.97572121091777e-66	6473.78686785706	4703.61551821318	6014.56869054716	161.254216744285	107.692343381144	181.742225948152
ENSGALG00000003005	CHRNB4	-9.27522642418002	3.29101712675635	1.08562294080998e-40	4.35003536675612e-39	655.901632457293	402.696061579038	413.842549241305	0	2.28277640228071	0
ENSGALG00000003011	TOM1L1	3.36224412641262	3.41906790176713	1.34722111682727e-15	1.02045652041577e-14	41.8022777011419	48.8008684317918	51.362469051316	351.519599187763	533.670379819661	804.537142135616
ENSGALG00000003014	CHRNA3	-10.2570395915288	4.29163145758949	7.10953427994082e-66	1.29169524869665e-63	1145.26399781443	1056.66583021876	754.681228035306	1.18785768593563	1.16539817603187	0
ENSGALG00000003022	Uncharacterised	1.72916450333623	1.83353328667403	0.000247967767227519	0.00055582161513243	25.4012265667618	54.0852652434249	42.5760427320803	160.36078760131	161.990346468431	125.100843526179
ENSGALG00000003026	Uncharacterised	-1.63046121456079	5.03434467334705	2.69131005694865e-06	7.96049181206732e-06	1015.79534813775	1349.81125449637	1376.51417057527	311.181284526872	583.872501438688	428.345492252862
ENSGALG00000003029	PLPP6	1.00578977415586	3.98632137262564	0.00201138949747499	0.00387466360276118	214.580981814387	316.943900907	261.924112794926	599.341696745023	428.055323659693	834.806345088523
ENSGALG00000003033	STXBP4	-2.92247379240215	7.21319695545871	7.92783011985266e-27	1.43839686565808e-25	6476.48124514058	5735.27250059667	7624.35695520526	841.203104240443	852.867224258835	1325.99082102431
ENSGALG00000003034	SS2	-4.14647266955379	3.47144708841567	8.74993603090976e-18	7.96502413026466e-17	306.828718326382	538.886185448935	735.054001534389	32.6548261540545	37.1059159792811	29.0693547636673
ENSGALG00000003035	FAM78B	1.63329064827264	4.38997509333754	7.46662192215879e-07	2.37995209213151e-06	251.726006022885	220.247963954541	298.188311870682	930.466877984107	534.287595069243	1373.16348494159
ENSGALG00000003039	SRM	2.04843183617569	6.86334899123014	2.29348062251934e-15	1.70506914217903e-14	960.048022390047	1164.10053221692	1304.08055897967	5123.84863343845	4318.20851634951	6944.94868885016
ENSGALG00000003045	E2F1	3.32372594385056	6.31248918171886	2.78045526709322e-24	4.15283538372267e-23	388.077592618614	277.512434582722	425.194444704491	4277.74384916052	2233.15518251598	6562.91371479437
ENSGALG00000003047	SUGP2	-1.59223107666647	7.26057215031353	4.62334495535637e-07	1.52270732910086e-06	5175.12197940137	5855.0658954654	6392.91531458714	1493.47807851632	2717.46267024735	2143.43742330923
ENSGALG00000003058	Uncharacterised	-1.05982776522524	1.187742287069	0.0250522615343703	0.0395040000868331	78.4734905257951	53.4535958671035	94.3972522585818	41.4066172234537	20.9836219464554	67.1057920612865
ENSGALG00000003059	HLF	2.35051743538049	6.16857716692872	4.21560383411483e-17	3.63770680883962e-16	747.575071935517	526.668309835855	509.151742399908	3325.72726780913	3279.20830187624	3643.89442436714
ENSGALG00000003067	MRPL44	1.80537579438933	6.56015619663948	7.2112674888611e-11	3.55682561192878e-10	765.53394481015	1149.84623998569	1258.63003011442	4205.85511967592	3054.77359494188	5669.93863968571
ENSGALG00000003068	EZH1	-1.29441877541145	5.75879473943451	9.07213809085688e-06	2.50101366657732e-05	1602.86278520773	2331.76463749165	1882.11805429148	654.576948872896	947.576191055723	1076.69740993855
ENSGALG00000003072	RPA1	1.13818994573014	6.52312195497841	0.000199430734400796	0.00045284195006981	1213.93814444116	1393.4205411801	1737.19284213562	3267.40348753216	4220.25226740824	2974.47897714113
ENSGALG00000003074	Uncharacterised	-1.77638695489312	3.10427357095737	3.97186993012529e-05	0.000100455589022219	310.358111153272	305.156627218336	385.215365706271	167.784065567632	55.7052916745636	114.59179934778
ENSGALG00000003078	MMD	-1.38005069545759	7.83509294503184	6.32074893999454e-05	0.000155330911971739	9487.91032326307	8583.53190992874	6905.66716626997	3697.80097631762	4360.91997471127	2269.43502058759
ENSGALG00000003082	DPH1	1.02457880941805	5.5298468592562	0.00100405114246027	0.00203246799487952	555.737664599522	773.342137471125	970.825786887773	2158.36508835641	1014.2204829024	2322.39380011501
ENSGALG00000003085	CDK1	3.86088760045398	6.01740366794943	1.91372445542729e-42	8.81309980983755e-41	190.057229749701	244.733616966694	195.580191991633	3470.02842925068	2871.52695283147	4164.93876843821
ENSGALG00000003091	PARN	-1.17966299623416	5.60041035802724	0.000105960000827	0.000251448826439167	2084.47939765962	1407.29876297048	1597.68305373764	754.855986168354	959.90747715904	761.625798240154
ENSGALG00000003096	CBFA2T2	1.14564849676011	5.52044203568667	6.34255623613725e-05	0.000155809081977937	719.841757676993	854.236863031364	585.859584119079	2199.96710091259	1156.8237288177	2193.08361288579
ENSGALG00000003099	PCTP	-1.30553925440741	2.05636561026254	0.00433761385515174	0.00791331121882771	129.50580280527	145.780952470111	166.262111674232	43.410867099376	42.7628766936828	129.359197539538
ENSGALG00000003103	MST1R	2.62050668159566	0.517814451658198	5.84656560867643e-06	1.64844812219123e-05	5.76261638012727	12.0048551697674	10.2597722695296	78.5882820781468	25.9579087403148	105.007714504913
ENSGALG00000003108	SMG6	1.19078288284798	7.88737678587236	1.51468280182197e-05	4.04454157450468e-05	2939.86982286522	4261.8840574406	3713.85488004851	7273.82471224737	7886.18717692666	13892.711656476
ENSGALG00000003111	BFAR	-1.87904803885292	4.46733474244074	5.79998132136775e-07	1.88187002429643e-06	1065.74711464892	820.293189525278	740.48921379128	191.245087435637	347.288656457499	240.510776638359
ENSGALG00000003113	RGS14	-2.4488392107547	5.12386059313176	2.51581154945557e-18	2.40224683804386e-17	1474.22869268032	1376.10927878797	1603.59047717122	316.498959572635	277.16168994217	330.224436690106
ENSGALG00000003118	ADGRA2	-2.38368768532766	1.26414224305394	2.89325699129465e-07	9.73940798871597e-07	71.7948955874296	119.973626279499	106.051234018901	19.3818208279996	18.7748196363022	27.0426326217125
ENSGALG00000003122	ZFAND2A	2.65375456040784	3.12094720984115	1.1004788704444e-10	5.30750954861968e-10	54.6414535530391	81.5778723222312	42.2876090792719	417.463636618955	331.522644362475	552.653731149749
ENSGALG00000003123	CNTNAP1	-1.29402698308108	7.93228901277867	5.00330139117512e-07	1.64051387765527e-06	7167.41853463779	9952.26221103668	9140.23671473197	3688.07448328145	3556.71118166109	5026.43343104706
ENSGALG00000003126	ERBB4	-6.04982280408803	4.69337330294076	2.09862892411048e-32	5.42575349327043e-31	969.812842666492	1411.07191912351	1470.10800306878	4.80218031677272	24.0097103395348	38.4741460107361
ENSGALG00000003131	DGKE	1.07985303761696	6.95780913902337	3.71330663999341e-05	9.4492682206893e-05	2087.06595418891	2079.07034604086	1874.75066918105	4931.15115741702	4747.48439358952	4578.17683024958
ENSGALG00000003135	ANK3	-1.61733983731145	7.66646370602557	0.00198716799654446	0.00383078621194319	6355.61830168161	8453.97171854572	8377.78939637022	2884.1894982537	4195.15120659873	695.954552283094
ENSGALG00000003137	RFLNA	1.56526838413147	1.87289045172551	0.00103317891804467	0.00208697106153312	38.0114459499402	68.7584923858806	29.9537230978176	207.627417154401	105.165793528882	149.433561745929
ENSGALG00000003143	ZC3H7A	-1.18792966891865	6.72775152031365	8.88831919801508e-06	2.45390877442285e-05	3464.05997707702	3968.11335019022	3712.85330106252	1362.43336742657	1844.74298625804	2368.08909369677
ENSGALG00000003148	SPAG16	2.83072860082035	3.6557945319345	2.6042181981216e-11	1.33874984347623e-10	76.1200029351907	80.9779636276822	76.0228918998805	925.326151769308	302.18020654563	711.23434386933
ENSGALG00000003155	SRR	1.43580070713459	3.91549407012986	1.09098083076229e-05	2.98098037873924e-05	202.471688174455	227.136252026931	183.443288100718	731.204814885834	471.094543375903	698.934083163093
ENSGALG00000003160	CERS1	-2.8625876545164	4.7051050525737	9.29846458080324e-14	5.94626498241048e-13	1224.78088097995	1206.90267811717	1032.67774234477	188.869372063766	214.433264389865	111.004973833089
ENSGALG00000003161	GDF3	-2.87285160629519	5.37154067898084	2.86614210497655e-19	2.89959136066392e-18	1719.18055340463	2144.50367350845	1644.12850619212	229.91252735628	328.107966477579	273.933168273686
ENSGALG00000003162	Uncharacterised	-1.13702369417439	5.37163230836297	2.59715674174925e-05	6.76076346728564e-05	1635.60929223413	1283.14258064167	1383.83239593319	634.395918665916	716.491039797572	868.032468276126
ENSGALG00000003168	MTMR12	-3.0601108452191	3.8047019321223	2.45724909237212e-14	1.66278034245568e-13	821.997518667458	650.292182225786	410.542204811265	79.5168831655152	87.1373717810735	85.9869098314564
ENSGALG00000003172	SLC16A9	-1.89609831770906	2.92574955990783	5.8636106186832e-07	1.89958641024903e-06	272.738946164996	326.057766068907	301.111741387651	81.0385622809653	75.874449005009	122.231252637632
ENSGALG00000003174	RIMS3	-6.81519460590909	3.01458517651616	6.90435546746532e-32	1.74524633671759e-30	405.639489325687	334.764571285573	464.452355200832	6.99238905619125	3.52396742327266	1.1044011550766
ENSGALG00000003179	ANGPTL7	-11.9730425273629	3.21966077087305	1.35802711593244e-47	7.93458750599648e-46	463.823949741014	459.124809061451	479.890148009109	0	0	0
ENSGALG00000003181	SURF2	1.6543054298948	4.90809298896094	3.14447346829299e-08	1.16886635678167e-07	306.938187063428	346.122859365455	439.207815886126	1536.30851873492	890.324230729663	1552.99171877991
ENSGALG00000003185	SCPEP1	-1.24085701337867	4.56917819088112	0.000121665588361346	0.000285703027343579	835.316458944205	775.014228579171	908.526805911017	523.897184323424	221.8607306349	500.929865720295
ENSGALG00000003193	CRABP-I	-6.6304257305428	6.26906709059817	9.8233122902871e-39	3.52125921367778e-37	3112.87241613855	3911.537365308	4524.61429446326	10.9135046997886	51.2988613476482	71.8999176459641
ENSGALG00000003194	ATP6V0A2	-1.03995338337866	6.62825046126271	2.18719027105903e-05	5.73861613552047e-05	3382.30492485494	2972.14194455119	3714.05758256424	1763.44477076185	1557.82729476107	2304.93219259535
ENSGALG00000003197	RPL7A	1.46199923425923	10.7342065703811	1.36584884549211e-06	4.2079566173663e-06	24761.2150461492	19327.1993329389	24585.0741131602	74633.6597199825	37335.8501785653	114958.491129479
ENSGALG00000003204	MED22	-1.09883700388157	6.09993834738112	1.70313593222741e-05	4.52679195774191e-05	2757.5938939551	1995.78613965074	2320.21109917505	1173.03396281622	994.058163733154	1657.1528939817
ENSGALG00000003206	METTL13	1.14201850634559	4.77827855589126	2.81320794093652e-05	7.28314989667012e-05	435.448837521564	409.535909758725	446.448325848195	1099.57701423973	889.141408688337	1277.37996426154
ENSGALG00000003212	TSPO2	-3.8358639323188	0.741876135821206	1.37060098922428e-11	7.20217152142695e-11	58.1457155783051	87.8868914878074	82.5975014484908	6.54810281987314	6.83984817968643	4.18022777011419
ENSGALG00000003235	Uncharacterised	-1.0093344489875	6.70471262801247	0.00117132119267263	0.00234848571102298	3063.27090993968	3770.12666544332	3709.51165370616	1361.89833783674	2465.36071168224	1928.83718667157
ENSGALG00000003241	CCDC28B	3.3722998675793	4.50955883734557	6.66063758303225e-23	9.1260368041071e-22	108.043696527907	80.3682161113155	113.702195347106	1462.98773660414	870.879197470092	1245.68557417084
ENSGALG00000003250	ITPA	1.01914561806698	5.42426877730105	0.000318231548932875	0.000701579959025386	771.976407398543	730.151080786237	641.979938450388	1879.19085915017	1529.00240695382	1438.65970055106
ENSGALG00000003259	EIF2B1	1.17595853787496	5.35390256211338	7.95161517567134e-06	2.2100224659457e-05	659.32748958073	621.980550299387	614.43073432963	1779.41081353158	1383.32763494983	1692.38535502669
ENSGALG00000003265	PTP4A2	1.08109692223613	6.79932187729494	3.58246073723129e-05	9.14789694992272e-05	1650.96835437181	1617.74814703419	2137.89336385232	4505.05922990099	2954.30133087858	5926.03305198519
ENSGALG00000003282	STAT5A	-3.29571468997458	7.52199529241962	2.28084304930612e-25	3.72547061120037e-24	7336.74332636257	10472.2367454628	7445.30036312443	693.007548436574	760.078128967654	1582.63423376523
ENSGALG00000003283	Uncharacterised	1.25895043838373	2.10583841802596	0.00208786359230681	0.00400916965755976	50.2210808501757	61.4679080546908	76.39453289852	165.011337334935	127.078924211471	232.58286231322
ENSGALG00000003285	CDHR2	-2.74671440624014	2.13697927831871	9.10161546242158e-11	4.4429416959182e-10	205.449876205264	189.205904480845	177.890126606554	31.6342978310497	24.2453210666623	42.5709703341162
ENSGALG00000003287	TMEM39B	-1.04190736749444	4.53499535409867	0.000857163056559338	0.00175766135113582	931.010173729574	826.302663441214	599.403895718307	447.822347597733	413.716352491315	421.114107081083
ENSGALG00000003294	ATAD5	1.48827613507959	5.00955408077789	7.3582039141669e-07	2.34708654433852e-06	502.286613869738	359.444677173811	416.359235463878	1137.7937280839	950.864954349794	2158.33741534504
ENSGALG00000003295	ADAMTS12	-1.78724417766297	1.64014686888028	0.0171749722847511	0.0279979913240726	147.440921644988	130.118254930001	81.6370653851363	87.3080375983085	20.5195445390593	5.85231887815987
ENSGALG00000003298	DDX55	-1.85642368248042	4.1244041956509	2.33659169057558e-07	7.94824713826721e-07	801.00367683769	726.839413005919	535.218120060463	136.275425305723	212.854851670581	305.892037905615
ENSGALG00000003301	FAM167B	1.97990417124231	0.975873002954798	0.00637148503322878	0.0112989712522681	36.3410722364407	3.42416460342107	17.2878491403818	124.41395357759	23.9394686289025	123.73474199538
ENSGALG00000003304	CRTC1	-1.70379792581069	5.69489333365398	4.15306036375554e-11	2.09836341350437e-10	2103.54370773753	1841.27297865996	2048.66414266709	623.983708271365	630.292397308248	846.942530072106
ENSGALG00000003313	Uncharacterised	2.72916989124072	3.43341418322825	1.08125489343185e-11	5.74546620656517e-11	60.5807419827172	68.7584923858806	82.8132344469075	673.684704596726	306.483169712741	667.024669469259
ENSGALG00000003321	RILPL2	-1.441902964258	2.27117934268604	0.00140360530129103	0.00277892478146334	197.184375865315	194.621495397323	135.672745795997	81.7256854756684	79.1247398931587	51.759110772333
ENSGALG00000003322	TBC1D2B	-1.81966697565783	3.76228101585282	7.87429176561522e-07	2.50087959021443e-06	682.094043736785	453.994922926687	458.152963604515	128.751227351961	178.056559377896	203.612445431163
ENSGALG00000003323	NECAB2	-1.39419893341987	0.361430942889603	0.00606284211106466	0.0107848008206881	34.2644395372155	65.0591274650003	34.5756982807636	21.8270093995771	17.0996204492161	18.3930021885024
ENSGALG00000003325	Uncharacterised	1.22703506337163	5.80738097735185	3.62951634101285e-06	1.05381513202394e-05	724.015449783778	816.116650795497	993.00773499211	2117.76151969677	2109.58045846913	2484.57485127109
ENSGALG00000003326	AMACR	1.0149749308391	3.73386039090086	0.00392740300621322	0.00721156667193768	272.429484189103	189.505131376122	200.747948923122	385.74679626655	426.400058215992	748.783983141935
ENSGALG00000003329	GORAB	-1.1674944509499	4.94468672165755	2.6653731633316e-05	6.92203725577971e-05	1059.08267660484	1187.04372918597	973.882168241508	601.33410895835	456.559865994069	568.51097673553
ENSGALG00000003345	Uncharacterised	1.24857042910757	8.4467423297829	5.31088931965615e-06	1.50896154769922e-05	3796.19390672047	6673.89618012789	5173.155462635	13996.6653420796	11744.3489408456	16853.988421773
ENSGALG00000003349	PLEKHA2	-3.98481726619896	4.19134286356272	1.49052401677376e-20	1.69981255670424e-19	967.897194567022	754.902745796672	873.080375983085	48.7339182802658	28.4255488367765	122.521329254286
ENSGALG00000003355	NOP16	1.90616132820509	5.49439228413511	3.7680652746228e-11	1.91258514111451e-10	410.390890781186	443.104143632104	580.418839433438	2424.30853922212	1356.13572145662	2452.26450604249
ENSGALG00000003357	FKBP8	1.52658506135038	6.27375759173409	3.58409507356467e-09	1.48503133273003e-08	1032.4175446	1042.22186637972	940.551248275693	3690.17630652315	2883.14659608054	3214.57950404766
ENSGALG00000003362	ACSS2	1.01138494190661	6.39657766390009	0.000432202059617085	0.000930829364759673	1264.22331309907	1587.02445984507	1374.16636877739	2339.17787716253	2347.20678740881	5447.07107477298
ENSGALG00000003377	SIMC1	-1.07591262352186	4.29819185081583	0.00696468996335299	0.0122705476864972	775.289610863773	749.181081520034	490.041903602572	346.854444293205	451.009094124335	229.057882512723
ENSGALG00000003378	Uncharacterised	-1.53272753471457	4.85748519621271	9.46624746532042e-08	3.35249239339238e-07	1271.00772395113	1079.15871100552	905.659627781073	437.342857410334	370.58422481606	470.840943154771
ENSGALG00000003391	EIF2AK1	-1.2142215496646	5.43013242060285	2.27788980874345e-05	5.96714448614741e-05	1146.21385629699	1750.90222906912	1657.19620631733	587.621567830716	650.492280340117	1032.62793455502
ENSGALG00000003403	ZNF385C	-4.1863398562737	5.39315671496368	3.94944891002235e-32	1.00927824457854e-30	2050.67479048487	2495.07460769282	1480.03197362935	99.312892768076	143.636811773415	124.570787549403
ENSGALG00000003405	BSDC1	-1.30820353008403	6.05341955388712	1.49205378194879e-07	5.17227112127203e-07	2417.03581709011	2226.2664196525	2512.51262779926	1045.64846137288	865.712868885633	1432.55636923837
ENSGALG00000003408	RP1-27O5.3	-2.48774133957164	4.61103382551105	1.08490366828105e-15	8.27910089321721e-15	1036.31051235955	1121.90828313826	974.678365605316	174.733520790773	214.931484369806	240.832910440615
ENSGALG00000003409	SOGA1	-2.17837076375928	7.82854568179746	9.61068002859383e-17	8.02685448483879e-16	8430.29325362267	9818.53787567351	9930.19792633762	2673.52565723493	1662.0585613974	2867.82975762998
ENSGALG00000003420	ZBTB8A	-3.00232487500404	3.97489747597775	8.69402732348483e-17	7.32119900897646e-16	713.32333218385	748.750659948074	648.294342764317	114.59179934778	55.5737664599522	139.619607521814
ENSGALG00000003429	PBX1	-1.83204513571822	6.16607468271633	2.75592540749358e-09	1.16029221928446e-08	2348.72428761123	3370.63232529378	2761.35326437264	585.211881474281	1009.67903304529	1084.98570188567
ENSGALG00000003432	AGXT2	-2.79848837652259	-0.224733728572917	1.17562619467889e-06	3.64903585771732e-06	27.3593927187457	34.2778677149364	43.6092866837288	4.56555280456142	6.72305244348181	5.45675234989428
ENSGALG00000003438	NUF2	4.76581189160783	6.44867845939492	1.14855143332265e-57	1.23847460651693e-55	147.294353056018	173.644328228749	147.125639921633	5124.42135955542	4368.88753688555	4864.521588232
ENSGALG00000003443	LRRC52	3.39634590232562	0.117588058108765	3.3524409936367e-08	1.24303675981559e-07	3.34418221609135	7.26821444728814	2.28277640228071	52.8239834844999	57.8415749088794	42.7490511230402
ENSGALG00000003445	MGST3	1.0809666889906	4.5505284780075	0.00381079183398955	0.0070149246487444	241.959629356407	309.33685498845	582.495472132664	829.789222229039	964.277807607963	876.354427393022
ENSGALG00000003458	CCZ1	-1.01126506982197	5.1732784662715	0.000155789241857232	0.00035984547453021	1314.83697073237	1276.88004987526	1054.19160069417	601.11675334242	607.415064523366	865.17225646439
ENSGALG00000003461	USP49	-1.38672289074467	6.99110064319218	2.57733311178514e-07	8.7268749199914e-07	3740.847989852	5259.83383332298	4922.64189555864	1702.07626544069	2013.32330570464	2299.62535183155
ENSGALG00000003464	Uncharacterised	-1.09576620750441	1.033150816292	0.0107134186628203	0.018230956084807	70.1118326248817	75.3031824285411	58.9936905497954	35.949958822982	30.1111741387651	43.3727516433335
ENSGALG00000003466	Uncharacterised	1.29695614745913	2.27103936048632	0.0112735950541555	0.0190789449028027	85.0388889408982	78.1231609071693	45.0805158339674	190.057229749701	248.229811494789	108.361998265634
ENSGALG00000003467	BYSL	1.65472803401572	6.41458311897023	5.69426731487519e-09	2.30675221127641e-08	881.389507670629	896.601370475574	1330.40060824791	4338.77740936667	2382.20197813232	4690.39170561032
ENSGALG00000003473	SFRP1	-3.57155725157294	4.84420115833381	1.57331288138348e-18	1.52312764567803e-17	1652.30461154799	1073.00118318831	1278.31365210092	95.5251041643584	171.208230171053	97.004042398809
ENSGALG00000003484	BARD1	2.55701156797281	3.81488141728995	5.73291014535035e-12	3.12389429982669e-11	85.4788096385545	115.683149817759	106.01764678514	479.054102455086	603.261799124915	1023.8252164229
ENSGALG00000003495	ALDH9A1	1.73565741683718	7.2778525500439	3.1280427883168e-11	1.59689112784626e-10	1991.71460771141	1713.38196901145	1718.07361351693	7629.54853695332	5978.59139757319	6757.62814176257
ENSGALG00000003496	TEX2	-1.93906349703531	4.19549760513683	1.87021814912587e-07	6.41777575985936e-07	765.467542493572	845.796614233614	582.242076295807	148.816108616065	264.770669151211	218.005146417808
ENSGALG00000003499	MAST3	-6.01032559624498	6.28557923698998	5.5054527052598e-51	3.96841408857939e-49	3599.73272287302	4328.1481267452	3694.82487931471	38.4019208956019	91.4650418170437	68.7584923858806
ENSGALG00000003505	LACTB	-1.85030470823941	3.54109728635217	6.11181646284042e-07	1.97517109519134e-06	412.170458133259	480.74046987063	479.38304447895	131.579740679573	157.154467676955	133.377039503885
ENSGALG00000003510	UCK2	1.60253692808886	5.65989983113419	4.00983033455021e-08	1.47156557075649e-07	482.783536988354	771.976407398543	638.005814075216	1689.68451940648	2179.71885369189	2655.94244317664
ENSGALG00000003517	ZBTB8OS	1.37100311434076	5.86681835981208	5.8004106607282e-07	1.88187002429643e-06	775.467787371949	727.359631999869	956.289357993196	2896.84325449422	1587.60081272506	2892.07874544397
ENSGALG00000003520	POLG2	-1.54413678845603	4.81806069311503	7.49082724428225e-06	2.08923080317768e-05	1469.56709997619	838.704246738893	866.954906735131	350.552645096273	257.960729494369	692.521030900474
ENSGALG00000003521	TPM1	-2.47748336711907	4.21541478912747	4.11195628085651e-09	1.69211530105491e-08	683.721156815172	908.711129740759	784.312972469451	84.5752181585438	220.88023101532	161.254216744285
ENSGALG00000003537	SGK2	-4.73341885035098	2.55610231522113	9.57539912718669e-20	1.01436516472745e-18	311.008946096496	250.234240256634	289.91260308965	4.80218031677272	10.9135046997886	21.3745255615201
ENSGALG00000003539	KIAA1522	-1.64345638283022	4.31750914240369	2.01630756746557e-06	6.08082784130314e-06	785.229221259463	826.302663441214	669.529142571146	277.958698508938	144.509373827952	452.829813890537
ENSGALG00000003547	SKP2	2.09932008105252	6.3956126433346	7.02813869439079e-14	4.54260250992715e-13	1002.95108191057	752.383299765507	654.623668799882	3325.72726780913	3902.40625969888	4426.6498160011
ENSGALG00000003548	BAIAP2L1	-7.62494748330596	2.72799701541294	2.0577706991326e-33	5.68587766304077e-32	297.53339581636	292.615943907993	400.79011095046	1.14138820114036	0	4.36540187991543
ENSGALG00000003554	OPTC	-6.70306710027213	3.61947639915009	7.18684900514197e-29	1.50345707184855e-27	480.024011195023	643.818865777113	710.892887379443	0	12.1484127058426	7.01105290192545
ENSGALG00000003558	NADK2	1.67860642713183	5.22775655356077	2.4061385207452e-06	7.17137420239183e-06	665.95389651119	426.672648031463	255.456256392482	1596.48072989749	1037.20437666837	2472.06314742577
ENSGALG00000003560	SLC6A2	2.85948238430947	0.618070042005456	2.94604543499014e-06	8.64455765581288e-06	6.22989809767555	17.1208230171053	2.88130819006363	98.2215422980971	42.7490511230402	81.9324642942381
ENSGALG00000003566	SMURF2	-2.16948560450324	5.81795212964027	4.7635519995297e-12	2.61827559758651e-11	1788.19379474737	2734.44839302383	2456.65935507519	407.018237387992	653.805483805347	681.073710472759
ENSGALG00000003567	FNDC5	1.39932363104192	5.67206478004542	3.50360963601069e-07	1.17159411012151e-06	536.524040193262	795.168831655152	786.23950400164	1893.38166502663	1692.69720245828	2903.0068564954
ENSGALG00000003570	ATIC	3.75483042463165	8.5067391728549	1.44293070607248e-33	4.03746623515598e-32	1473.5321676722	1204.3868234466	1119.72558219831	18963.4790781806	11575.8867410002	30525.4623622606
ENSGALG00000003572	ARHGEF18	-1.42408922646534	5.89758667559863	6.91256598156655e-07	2.21345636440167e-06	1805.02235113531	2270.79785660274	2490.50905488826	803.884985027754	1007.31648379048	909.699807898295
ENSGALG00000003573	HPCA	-3.12948293698113	5.54973796155517	1.31090875044082e-11	6.90766100798436e-11	2205.16200460317	1970.81480200353	2182.70093995771	162.446394267553	104.505694252855	649.986034857482
ENSGALG00000003574	LPCAT2	1.30084088080534	5.97392904965712	1.99509354253193e-06	6.02205863782455e-06	936.031856517278	1023.21959855599	784.963743533985	3002.86674065328	2195.46113728866	2410.97277274996
ENSGALG00000003582	SLC1A3	-6.97767747920551	4.71569034072172	2.66685336018768e-34	7.72281137907624e-33	1312.67786516907	1272.27013064824	1353.13321007161	10.0178924075483	21.3814383468414	1.16539817603187
ENSGALG00000003584	KPNA2	4.74606212961676	7.46845023035527	1.41902572430588e-58	1.65092440188324e-56	303.518262973585	294.288035016039	364.449038714019	8342.40636213486	8957.98716290784	12251.5003759826
ENSGALG00000003588	IRX5	-5.13238629258216	0.921430151492487	4.43543454054077e-16	3.50370269870115e-15	80.3682161113155	85.2766465103295	105.908267660484	2.28277640228071	0	6.54810281987314
ENSGALG00000003590	C17orf58	2.0743674180498	2.04009548003328	2.74050102084547e-06	8.0951592515531e-06	42.0663174115527	40.0715696301933	34.4478728921333	210.937069861769	102.195055274907	269.47388183869
ENSGALG00000003594	ANK1	-2.1730822439061	2.37965835337475	3.9992184013684e-06	1.15458497295057e-05	180.636717284941	201.74713498236	255.116666822695	27.0426326217125	62.611827547177	70.0836034702023
ENSGALG00000003595	Uncharacterised	-4.01178651789629	4.02964631425224	8.11702323253738e-22	1.0311884974439e-20	801.795238585612	876.381612740682	642.814762817684	65.3321727264598	57.1045106255618	35.2396742327266
ENSGALG00000003625	NDUFS5	1.03873731655551	5.73683968644602	0.00194376975452951	0.00375537001230892	483.2343302252	906.450173211792	1247.53730384641	2439.50760092054	1570.45332629957	2178.49164523013
ENSGALG00000003631	CPLANE1	-1.91187154616699	5.91471414630062	3.38121896815423e-06	9.85606751090758e-06	2897.94093176874	2925.37795952273	1390.71141973738	355.780253213107	960.143688223482	795.079321875719
ENSGALG00000003634	PTEN	-1.28570496948918	7.21714616115705	2.43400662898609e-06	7.24954635532056e-06	5809.50990751889	4217.30801380155	5939.46941200195	2226.51008585433	1744.782927648	3747.69099912692
ENSGALG00000003636	FBLIM1	4.12529277095751	1.48192696481475	2.1855108685696e-14	1.48648362306864e-13	5.19158174806296	7.98971740798249	8.6439245701909	193.169033186258	90.6279883808451	163.028883034453
ENSGALG00000003641	KAT6A	-1.36064440952796	7.59804991784019	2.63093815252237e-06	7.79931442040773e-06	7791.15856205181	7819.82176117388	5502.67513144026	2594.23831327493	3425.40013208358	3116.39936311482
ENSGALG00000003642	PDGFA	2.29600202348492	0.723428730579915	1.07054643903486e-05	2.92816197585469e-05	11.4138820114036	16.3274130770273	12.0048551697674	46.1689752128834	61.0313254436672	124.597961953511
ENSGALG00000003645	Uncharacterised	1.72487191798596	6.47881809725209	2.60645987847532e-11	1.33938308284456e-10	1196.17483479509	1028.62702385272	909.094941492388	4459.58101315555	3098.38482320864	4262.28861515969
ENSGALG00000003651	NT5C3B	1.0221148605597	5.36490866866133	7.89690663790568e-05	0.000191509732562704	619.006260261622	690.573627622864	744.472822672228	1603.6504226022	1224.55598077704	1990.62325724143
ENSGALG00000003660	FANCF	5.92621200556561	2.13475154811128	5.10453604369637e-23	7.05958931674087e-22	4.6615927041275	4.40495927909082	1.1044011550766	248.391588525359	146.929088644042	361.108736524432
ENSGALG00000003670	MAFB	-7.28537111328825	3.41715311385669	6.71637372274975e-40	2.5671257834245e-38	550.067939087045	565.596771435262	483.727705923551	4.0063159439574	5.84377057106985	1.18785768593563
ENSGALG00000003675	PRKAR1B	-1.7222439877872	6.02842835720296	8.62773736543922e-11	4.23343250750353e-10	2831.91756775745	2130.23830736832	2615.22193522139	961.515826549777	612.761085595039	1088.07764031704
ENSGALG00000003691	RNF145	-1.46750164441255	6.85805963298958	5.85433229476652e-08	2.11454273489892e-07	5085.69319010147	3983.35658364488	3825.74445520851	1488.94564534446	1815.94862801431	1935.27866765941
ENSGALG00000003693	MACF1	-1.63254726327657	10.3421497813335	5.49843062719317e-09	2.22878011639557e-08	40491.9012237436	55024.3381380131	53059.003781553	15254.6533082409	19177.0268770002	19191.3980145782
ENSGALG00000003717	MYO9B	-2.48677320389636	5.27525334305261	1.13286302467769e-18	1.10560428964682e-17	1785.81533201901	1348.24135318254	1834.05226708462	342.627063753371	257.249621898904	424.090043549414
ENSGALG00000003726	EGFLAM	-1.51404496691125	9.15219648192363	1.23207664509661e-06	3.81443336692726e-06	18726.649334959	20763.1913341572	24290.372682837	9295.46551008706	9033.86161191284	6096.28372530189
ENSGALG00000003727	HAUS8	1.35285957964699	3.55714285567342	0.000268881271433894	0.000600062645638185	219.36144446575	112.002513942365	166.373065250545	442.322764934964	431.444740031055	578.182510139436
ENSGALG00000003733	LIFR	-2.55482590011203	3.91499194785669	2.1319803128574e-14	1.45156339268109e-13	706.113185122492	568.515394128367	669.951734867697	116.539817603187	105.71902269818	157.929365175954
ENSGALG00000003736	ABCB9	-1.4249692215137	3.24684312000057	0.000394985009246942	0.000857685440965573	265.47414880003	416.938047763407	357.777240041785	110.123981977271	167.868975571643	153.241584856371
ENSGALG00000003742	CPAMD8	-9.88652910079406	5.04198804347709	2.48679671786784e-85	1.57058975567053e-82	1972.46046296681	1675.64164356018	1329.04039273474	2.37571537187126	2.33079635206375	0.880991855818165
ENSGALG00000003743	VPS37B	-1.22921072357508	4.3229880789385	5.46516302529301e-05	0.000135611706650068	669.450140586809	609.477208882649	837.921294137361	361.820059761493	281.407766562881	388.520767312473
ENSGALG00000003744	ADAM19	-1.5225854105008	0.620992621716483	0.00597174624579915	0.0106341662806168	68.528879074431	43.3727516433335	53.7844195478545	39.2886169192388	10.2597722695296	15.8848655264339
ENSGALG00000003750	PLCG1	-1.4648950113379	5.33329555961359	1.12706624705673e-05	3.07135394179442e-05	1563.22071469129	1708.47372606273	1204.31586690343	815.048052446531	285.450011006965	816.458231215188
ENSGALG00000003759	RORA	-1.89864635103435	5.27332618702777	5.97550362316353e-11	2.97161996827964e-10	1534.77682924056	1854.20444849408	1222.62286211895	385.417000404528	448.552663032639	574.118265173599
ENSGALG00000003766	KIAA0100	1.11477494122012	7.73659700190488	7.94288616343567e-05	0.000192589578035918	2941.13471726516	3401.86935931893	3851.1153407131	9988.28814817926	4780.09028731557	11203.8039248029
ENSGALG00000003770	ANXA2	-2.29625079105081	4.54418334314984	1.30608353764162e-13	8.20198198851366e-13	1132.76702710298	882.753839529801	913.339755248348	218.344218945678	156.112156684295	324.285148260428
ENSGALG00000003771	SIN3B	-1.60957734490243	5.91969042797746	3.95540280516084e-08	1.45319965110383e-07	2132.00029107996	2619.6395398417	2145.38218798919	557.662677353523	812.494657179972	1241.14905747395
ENSGALG00000003775	RICTOR	-1.86659623369972	5.82388222120074	1.24577908360764e-07	4.35382555622874e-07	2967.26849946721	2577.86076538251	1184.05305421961	509.128932490313	718.132132954364	864.043220151042
ENSGALG00000003777	NELL1	-1.04676747841789	5.23749310442163	0.00055788131218663	0.00118216645526942	1327.3885225003	1036.92741429798	1476.58434433741	761.200029351907	710.435536568635	586.801696852202
ENSGALG00000003778	TMEM38A	-2.58882004969319	6.95682357462924	4.76412452863253e-24	7.01293935885164e-23	5825.64537862038	4888.61956247463	5406.55022827526	1015.71745468343	813.472324064221	1255.32446668162
ENSGALG00000003789	Uncharacterised	-2.12879567043929	-0.245653645706165	0.000119454086048596	0.000281007368439611	27.610028876915	41.0647384255634	27.5492041207579	5.93928842967816	10.4885835842869	7.92892670236348
ENSGALG00000003803	DAB2	-3.94578027173257	0.285945880361668	1.32939696941399e-07	4.63506624745997e-07	71.786075079979	49.0773703134782	44.2456914666717	0	9.32318540825499	1.76198371163633
ENSGALG00000003805	Uncharacterised	2.62155303562028	3.24523197885799	4.46397172538664e-10	2.02759099293846e-09	66.2700883714636	89.4907385382663	42.7490511230402	423.875095889579	323.954701079128	691.681249891056
ENSGALG00000003816	NT5C1A	-2.38373921824753	6.02860958998182	5.08815179382055e-06	1.45033649777438e-05	2713.1206215377	2947.0643353444	2627.75306933803	849.070665643551	683.129836946182	140.455653075837
ENSGALG00000003818	CYFIP2	-1.84164441962279	8.22045719650589	4.13728555550497e-08	1.51582371057078e-07	9141.32208768571	13047.4832492318	13103.1365490913	3722.65018156221	4358.85377709555	2596.57736521346
ENSGALG00000003819	Uncharacterised	1.09312941187675	4.41216856226669	0.000439286010327122	0.000944746287492885	271.3179193711	388.429463300952	364.769629097977	967.329057688345	648.283478029964	876.381612740682
ENSGALG00000003821	RAMP1	1.69939937609398	3.75547215559171	3.81902447329408e-05	9.68854659320952e-05	202.779282629546	163.864485182179	111.544516662737	787.24108298763	275.492041207579	772.107495858161
ENSGALG00000003829	HPCAL4	-6.1375486012057	3.78553433069106	1.37032886432893e-40	5.43837078800248e-39	717.466042305122	816.944121398344	518.023211221081	11.044011550766	8.01263188791481	14.1920142440268
ENSGALG00000003833	CACNA1E	-2.85241383018868	3.028139296912	3.55898228492352e-09	1.47524033988315e-08	378.926601813467	374.092814506232	324.205002941085	46.3848485132172	78.1231609071693	35.0626234264191
ENSGALG00000003836	Uncharacterised	-3.54310887458653	0.351641704012035	6.85398138117897e-09	2.75885751315862e-08	71.6438281232688	70.7660684707021	27.8526458372818	5.45675234989428	4.27490511230402	6.6883644321827
ENSGALG00000003837	ADCY7	-1.36516656068579	3.19672652065779	0.00030202224029839	0.000668958078336263	315.40028582389	341.137427961861	336.926358271204	149.517554344213	85.6041150855267	221.8607306349
ENSGALG00000003838	Uncharacterised	-7.59854502789594	5.31122190232667	7.73468304685239e-68	1.57823232692928e-65	1406.22862186641	2414.08551284927	2151.51675914957	6.72305244348181	14.1875561097251	13.6796963593729
ENSGALG00000003841	Uncharacterised	-1.80498266098182	2.88106157137639	1.64518164624522e-05	4.38065532506533e-05	300.185096899914	276.605586246109	283.751122194503	113.712475987287	44.3104143632104	133.942809100024
ENSGALG00000003845	MKNK2	-1.70205350117535	5.7508988705036	1.11545831629015e-08	4.37572423808231e-08	1720.22181719114	2212.17653594443	2296.75576534305	805.820070005092	399.54140235549	1066.24940916934
ENSGALG00000003849	TRPM1	-6.45188642666411	6.34268588286675	2.75009178302983e-29	5.97942087185649e-28	4785.37020494691	3953.23225769997	3405.24859419913	33.2600152061977	89.7356595544543	20.2628126838178
ENSGALG00000003851	TRIT1	-1.73736628319865	5.75627768706214	2.36946959727133e-10	1.10968486117972e-09	1602.02796084043	2350.77036046662	2334.29254659184	658.100916296169	637.239466479198	858.353190992874
ENSGALG00000003860	MID2	1.79013894784392	3.05552608468068	6.49275863284956e-05	0.000159321845971293	96.7280486106456	96.0281122841799	86.1432900959748	429.677384989431	146.094264276746	590.365269910009
ENSGALG00000003861	Uncharacterised	-1.06931160911004	6.01776248515626	0.000116676668600503	0.000274863704378058	2503.0643251008	1897.82166118858	2236.17711298668	880.630453134627	1217.28232665725	1495.17554344213
ENSGALG00000003862	LRRFIP1	-1.05675281741542	5.89592350004398	3.61425349366292e-05	9.21843155508678e-05	1887.53789445556	2267.62032245112	1927.56858315672	964.68608212089	898.982540232352	1530.41269059173
ENSGALG00000003866	FIBCD1	-2.31548972446796	7.21028311771401	8.45841884961395e-13	4.94856679322584e-12	4030.5756159441	7203.83883361216	7421.3060838146	1869.9690153513	1042.23969882981	1344.03016730838
ENSGALG00000003870	MED7	-1.27042466764934	4.3274458841888	3.60722903923922e-05	9.20405516495379e-05	755.863181860026	715.92590830613	670.30512160927	298.468262786153	341.606079022542	357.254506956931
ENSGALG00000003875	ABL1	-1.74023040048903	6.30145769575664	5.18693195720539e-12	2.84509009712221e-11	2877.17460477649	3492.64789548949	2815.03810169217	1106.62937655856	849.851136326038	1185.51259560438
ENSGALG00000003878	PIN4	1.0442691817857	4.76290799154727	0.000853583694065711	0.00175086305821119	288.08433685254	526.799350971538	522.824230686441	985.927577776213	915.838275856373	1252.80303923426
ENSGALG00000003880	STX10	-2.62964546026588	6.6705495821242	2.78593225243995e-23	3.92248614268694e-22	4716.36641840099	4042.87162634956	4511.47871848791	668.053183654897	690.399751753538	1124.90122858104
ENSGALG00000003881	ERCC6L	4.99126200440351	4.09667110215752	1.0636439158618e-30	2.52815578065861e-29	29.7735179639909	26.1924112794926	22.2295065839809	571.019113397598	903.335224162954	1419.8869222186
ENSGALG00000003882	SMARCE1	-1.05597902105647	8.10213669041844	0.000167554519025905	0.000384942938825667	10598.1044139647	8863.58825985115	8627.15407196166	4683.8450531024	5580.2469153752	4674.44232034657
ENSGALG00000003883	MTMR10	-1.65028951775256	6.74474309114278	1.150316907014e-09	5.03283679148834e-09	4502.77645349871	3599.71436545283	4204.97336082854	1139.68970294025	1214.77418999518	2229.26520261823
ENSGALG00000003885	Uncharacterised	-3.54194425250559	4.16219010202624	5.42894969216656e-12	2.97046863726094e-11	506.698378610944	929.08999572825	1051.67748937323	123.322603107611	74.3833489540899	34.2778677149364
ENSGALG00000003886	SGCD	-1.21175545850912	3.10777195817169	0.00750429888840984	0.0131374757334979	337.850907537545	236.267271585218	330.679192403594	121.407305189434	197.30675074939	100.716685912421
ENSGALG00000003893	XPR1	-1.1936725206228	6.79219502491022	0.000198566783127761	0.000451189180165067	2865.12811363627	4151.18876575114	4647.73275504353	1909.34689394883	2193.6144446575	1464.58249147536
ENSGALG00000003899	RAB17	-5.4807411096671	0.349891876372518	2.84492067010715e-15	2.09042564252804e-14	71.1121080052439	54.26358387422	55.8293112389747	0	0	4.4176046203064
ENSGALG00000003904	MLPH	-2.27884526706113	3.23352645279838	4.56111967592655e-08	1.66375495769565e-07	378.41180896169	432.174786111627	363.366934545841	51.834824349416	84.1036243186199	146.097689745966
ENSGALG00000003911	CACNG5	1.5909651215205	6.38002520262787	2.83110515402189e-07	9.54229927771088e-07	1006.31266343637	824.340916266518	1307.24028416225	4011.97952700835	1869.00857928794	5391.27132169555
ENSGALG00000003914	CALR3	2.8603645238489	1.18979438753029	2.99836200891889e-08	1.11643108715023e-07	13.0205268178616	9.18306804025262	17.8178652890345	93.2318540825499	127.743819093634	102.709307422124
ENSGALG00000003916	SIAH1	-2.05652449531236	6.12944898669537	2.63083413041624e-14	1.7739071210834e-13	3057.54568359832	3157.06365887035	2325.81849935995	804.004040895765	715.127395996396	793.917973298204
ENSGALG00000003921	DBNDD2	3.72430811511228	5.457637720906	2.29408391109194e-30	5.35676671000217e-29	109.521967576992	185.858626580654	171.208230171053	2787.18545585489	1621.74679838858	2712.85478426813
ENSGALG00000003922	TOP2A	4.95519207623781	8.89238705283282	1.5257239882892e-58	1.75962410927649e-56	719.841757676993	865.890844791683	660.743891863624	22758.3946026635	26235.3599590051	29641.2739852009
ENSGALG00000003923	COL6A3	5.49611650248921	3.99380735034363	6.08236345271436e-42	2.72535089436995e-40	16.7388452605451	19.8792207913788	15.0236847898403	977.579334103256	719.841757676993	978.934467866774
ENSGALG00000003925	MYPN	-6.70421396668225	1.40579074650654	4.27716201113116e-21	5.1291139017751e-20	85.2766465103295	120.444696555061	183.763500383597	1.92087212670909	1.09135046997886	0.854981022460803
ENSGALG00000003928	LHX3	-7.43580843842468	7.52744242612093	1.03304824269412e-59	1.3174345041204e-57	9374.4629280004	8362.37469542602	10026.8580869405	28.0442116077018	41.7412183647846	123.537199337306
ENSGALG00000003930	APBA2	-3.15574298641122	5.94866038761283	1.2919903342141e-24	1.98100205811348e-23	2488.07156877197	2828.3737363447	3084.03091948124	345.756982807636	204.082537886046	575.402228116121
ENSGALG00000003932	SDC4	3.18862655008431	6.76132278055958	5.63639448112683e-18	5.24968398898772e-17	529.835283588367	505.90356658119	585.613839166267	5750.07460054127	2272.07799615505	10044.5285054217
ENSGALG00000003935	PBLD	1.84862589370732	2.53562489263017	4.38522316632446e-06	1.25999165630332e-05	60.703652594717	50.1627332413703	76.8354098713317	262.519286262282	222.821166698254	284.842472664482
ENSGALG00000003936	PPT1	-1.6786498931168	6.41871336837044	2.69959658769815e-09	1.13810392697522e-08	4004.55858830775	3231.09380880165	2630.53158134873	1408.79921551966	968.445884282487	1096.83486049361
ENSGALG00000003948	ALAS1	-1.12716902892982	6.61003548747325	3.04461864761961e-05	7.84702237143002e-05	3619.34198581607	3161.75552056316	3356.99404565496	1433.80317466677	1907.85595428012	1838.8582551639
ENSGALG00000003952	RBPJL	-3.27393555912799	-0.21099147110875	2.77366209862979e-07	9.36534633760867e-07	27.2837617494714	57.2837285048738	25.917412174708	4.15326539845036	4.56555280456142	3.84174425341818
ENSGALG00000003955	CEP350	-1.5978552058893	5.97126476132138	2.33116076416177e-06	6.96041990433982e-06	2051.83003220051	2764.31609115673	2316.65219459337	498.390147275529	1097.58050180452	1026.71579308408
ENSGALG00000003966	RPL23A	1.13233375971514	9.56519767310707	9.08077806288706e-05	0.000218185433782737	13299.4553196874	10655.0776868553	11973.206006138	30977.6724057998	16376.4603121993	46715.9292017697
ENSGALG00000003977	TWF2	-1.31108018558155	6.60783556264146	2.69500827639384e-06	7.96965323741617e-06	3512.51010256007	3268.47978508539	3737.29350877921	1387.18689559525	1012.64195752968	2664.36478955362
ENSGALG00000003980	IQCA1	2.88585705579462	1.69417694306113	3.571723354066e-06	1.03839909787324e-05	5.00894620377416	14.2542922312276	37.29274163302	126.862827237816	178.912987122409	162.255795730275
ENSGALG00000003985	TARSL2	-1.03045540695168	5.36839188503992	0.0012661839898399	0.00252532304620251	1369.15847384744	990.101699612692	1830.48869402681	715.554480083571	848.395157152893	705.712338093947
ENSGALG00000003987	TRAF4	-2.49347149587836	6.62354567419773	3.82033252030787e-09	1.57847570768982e-08	2747.40699277013	5401.18889794932	4520.57952482764	620.218266495988	358.930375399895	1821.87217551463
ENSGALG00000003990	Uncharacterised	-1.73974988876641	3.68978192041947	4.93351475141719e-05	0.000123110453712222	652.627581047356	447.155074747	397.121638160848	138.096074498475	221.429311021229	123.896252172736
ENSGALG00000004003	AIFM1	1.40934542381944	7.08718760199405	1.87006332945655e-08	7.13745321973591e-08	1761.26090626925	1713.05734019279	2151.39147639729	5773.14152136792	4355.57754731286	7142.88882601162
ENSGALG00000004009	Uncharacterised	3.56958696817972	-0.125209933543026	4.83237809976662e-09	1.96842231993872e-08	5.28595113490899	2.2088023101532	2.0031579719787	41.7412183647846	43.9507343796184	45.4505288652431
ENSGALG00000004033	GALNT10	-3.41167590274597	4.58476777759185	1.18292824445063e-11	6.27065439894032e-11	1249.07770639163	1165.8379396916	899.105843577461	84.3378957014299	185.298309989068	54.6214950607262
ENSGALG00000004035	CRYBA1	1.35502722184837	2.42268621577093	0.000838409327363555	0.00172346914271897	63.5394621057357	70.6055117736562	90.1696678900881	258.357301042372	148.423663917125	257.349287760702
ENSGALG00000004037	DNA2	4.93177096254902	5.70202436623416	1.08581563535891e-48	6.66720961655798e-47	60.5074719913363	101.495593708034	87.2080642910019	2422.02397000416	2225.11193721978	4275.64020147178
ENSGALG00000004045	AGAP1	-1.98049779868864	7.57734709997005	4.45368149243421e-13	2.68252396158741e-12	9035.29054095495	7627.28570137283	6407.45312603103	1962.4179007678	2208.58616920659	2407.81321082984
ENSGALG00000004048	PTPRS	-2.32932216218447	8.92351546233713	5.98103732149041e-15	4.26715965545601e-14	24115.8867398652	22578.4242624415	14644.7276192653	4473.92907921531	4668.35965369636	4470.48448686844
ENSGALG00000004049	ITFG1	-1.97631182310995	6.79161858467769	6.86072097872174e-15	4.87118535014916e-14	4563.03371687331	4296.43810212336	4507.33127366826	1375.37278237413	1117.94757774469	1355.45728371374
ENSGALG00000004055	C7orf50	1.71577284623024	4.18501637304517	2.91862600128305e-06	8.56789213258456e-06	177.079363019451	256.221067977771	206.325271113806	513.416985886851	927.716852715729	906.679780952798
ENSGALG00000004058	GPR146	-2.05285750214998	3.15090992043641	1.50138998040599e-07	5.20055766783094e-07	383.50643558316	326.548261540545	366.693757912896	69.2534628193251	84.4406009563066	148.479237994601
ENSGALG00000004068	FAM114A2	-1.00703636590339	5.51343093798546	0.000133604661239052	0.000311587589592676	1475.66135849543	1569.35404136385	1566.46953408734	702.087292895678	756.665345940998	1193.36773225664
ENSGALG00000004070	MICALL2	-1.67964942291233	2.42651818985224	0.00169595809991456	0.00330640780231763	188.095824941377	208.175342951687	217.008117069032	58.2107982581582	21.1295933938	160.428519086892
ENSGALG00000004071	NETO2	-1.67747214861761	6.08062241324154	3.75768228883357e-08	1.3840083364843e-07	2546.01378238493	2156.35134072477	3094.36927186232	1259.79542829046	697.745549807986	790.751227034846
ENSGALG00000004074	KCNS1	-3.3088358362623	5.0569331988548	3.34596495785031e-12	1.85991337954605e-11	1014.02162604671	1769.25065043271	1786.816911005	68.4555981182468	118.785768593563	377.589009034327
ENSGALG00000004078	Uncharacterised	-5.93014727055166	0.224461924515594	3.91936016955121e-16	3.11272298974597e-15	45.6555280456143	54.744855611209	65.4810281987314	0	1.67209110804568	1.03831634961259
ENSGALG00000004082	TAOK1	-1.08093162871682	6.76146350359902	1.35246894486245e-05	3.6392362782939e-05	3490.032533685	3534.80060240856	4120.03927526276	1798.8278049972	1806.5802351699	2408.61048724334
ENSGALG00000004083	GRIA1	-9.1220399915368	6.72702700446875	1.77155211838738e-108	3.9160159576953e-105	5831.6524728635	4234.0468590621	5933.94740622657	12.0189478318722	11.6875411421397	8.31500380154943
ENSGALG00000004085	ZDHHC13	1.33445883118679	3.04330971681248	0.00063464598336282	0.00133037927569797	99.8853505888726	139.692860157294	111.147532919904	247.46948399076	339.529446323317	418.889469818511
ENSGALG00000004088	FNBP1	-2.4603331639693	6.98674575502332	3.07714608828864e-22	4.03282495740833e-21	5167.50529975309	5158.40106832091	5914.24992739332	1076.32907367536	946.989958467581	1359.82268559366
ENSGALG00000004096	CHRNA7	-7.15414701361741	3.76733719983577	7.28869014498813e-29	1.52163089391168e-27	836.882977787748	764.730094764039	438.919280953027	0	11.1147532919904	4.18022777011419
ENSGALG00000004097	LRRC38	-2.54997109093167	5.59349751657913	2.23586477992653e-16	1.81482708544465e-15	2385.50649496546	2166.41534669497	1686.3452219373	414.562332391536	424.204936075602	337.419880778357
ENSGALG00000004134	GLRA1	-8.78371998052906	1.86911336605247	1.69101646122628e-22	2.25633313131229e-21	168.67579140286	284.357154951777	91.6231530050891	0	1.00157898598935	0
ENSGALG00000004144	Uncharacterised	2.01421752812332	7.50671790032079	5.51481139202895e-15	3.95795148768831e-14	1632.7969670066	1828.47509166777	1998.57074019676	7501.96609086235	7749.67968731986	9841.68654954631
ENSGALG00000004146	RIMS4	-1.97823748133913	4.11873767997998	3.35779743202966e-06	9.79640724615252e-06	508.315696845885	852.457723031937	729.347060528688	143.104973439827	277.20301937463	149.621678930641
ENSGALG00000004150	MYO1E	-1.99411620741291	2.44060076398771	9.61925406590786e-05	0.000229915600425547	190.618386317207	191.050208328717	268.226227267984	68.1909604981727	18.5529579896406	112.857494964826
ENSGALG00000004155	MYOM3	-8.30454918946663	3.15558371117886	3.17349831695955e-31	7.76570261583662e-30	716.756349644713	293.46264289488	328.085976347207	2.37571537187126	1.16539817603187	0.880991855818165
ENSGALG00000004156	KIF1BP	-1.75837261378731	5.88967805315908	2.23282780977646e-10	1.04902569043802e-09	2199.01118976919	2074.22901953066	2646.66837516249	967.897194567022	567.617713442536	799.959894494502
ENSGALG00000004161	CCNB1	3.10895414589191	7.03037071679401	1.17243444346e-25	1.95843803823803e-24	519.260756457921	773.295353544097	761.005008948814	5109.75276374535	6077.51955638653	9263.6040414155
ENSGALG00000004162	SLC16A6	1.29313632505418	5.48406933708041	5.62522035473427e-06	1.59111319182855e-05	620.913177068329	842.344492441583	497.505880817654	1903.31521964313	1575.73002439526	1975.57564415597
ENSGALG00000004165	TOR1A	-1.47946834143467	6.01944229668103	1.95407025583094e-07	6.69858718094748e-07	2445.79897534147	2683.91199940141	2093.23664942396	1020.46666729078	1000.57740700336	849.01638153972
ENSGALG00000004166	VPS51	-1.05267564682718	5.20579015788223	0.000816516121729203	0.00168133105457141	933.86288384351	1435.99151151421	1392.49360539123	664.621755841345	748.666422405496	586.516981408111
ENSGALG00000004171	RNF111	-1.00090818385452	6.19912427764787	8.96178059357289e-05	0.000215599666266202	2499.96450967539	2200.47189818811	2708.96735613925	1310.31365490913	1363.81920996345	1496.24149434101
ENSGALG00000004184	SPARC	-3.24410660927908	4.99542741315629	1.75150808299052e-06	5.31949890192427e-06	1285.03647675859	1536.65172829398	1538.78483012586	53.6452454535967	350.559163124409	53.476173028964
ENSGALG00000004189	MAFK	2.45775972172318	5.10281224558951	4.77698861230438e-18	4.4743785286012e-17	260.638672598078	310.489485656699	227.907052271724	1686.7579140286	1415.95878387873	1906.46637599051
ENSGALG00000004191	RIC8A	-1.81096173904024	6.96009879696823	2.81984442926704e-06	8.30179726201304e-06	4747.66511100409	5422.60967142611	4494.08491013422	1094.45474552465	2297.31676459951	1038.3697748444
ENSGALG00000004193	ARSG	1.0988278599464	3.07546705659345	0.00340398657455456	0.00631604280054801	145.674772003984	117.171916823816	139.154545539652	323.51001247456	214.549862394993	476.330932060189
ENSGALG00000004195	KIF4B	4.50501870392038	7.66805605635123	2.4910247733984e-50	1.72075320674911e-48	344.450768257409	469.318990024891	483.948597283511	9415.1547290646	10374.377567619	13879.7619186287
ENSGALG00000004197	SUPV3L1	1.69579133037553	5.65280012223944	6.98074234209845e-11	3.45082317119835e-10	675.545940916912	539.493025172767	578.543523383804	2018.48698364688	1833.06945103141	2848.65336390958
ENSGALG00000004205	SOAT1	2.86774227123287	5.52155207697881	3.49189746097456e-18	3.30571277836586e-17	244.91573591745	382.122799656504	209.330008071774	1671.31838332598	2082.31452344516	3316.72320898671
ENSGALG00000004209	ELFN1	1.41793122305018	3.58567270960855	0.000115721712738806	0.000272904885500494	180.339335780176	183.443288100718	127.688004987526	377.901611927675	394.613501498779	769.39241506293
ENSGALG00000004216	TOR3A	2.24376788028157	1.66268648944621	8.18915530196998e-07	2.59590742758193e-06	34.4478728921333	17.4809726404781	29.0727312419994	167.868975571643	108.17053048685	166.130049091843
ENSGALG00000004231	Uncharacterised	2.77607788148607	2.55730268856574	2.13359498757475e-09	9.07564795388194e-09	32.5966986652721	41.9672438929108	37.058422481606	177.817590233983	338.539440491655	342.627063753371
ENSGALG00000004238	MRM2	-1.01602300703343	3.40753069888526	0.00536199968199957	0.00962851364505285	371.717253161308	378.940882778598	317.904336970354	239.00575292537	175.271109604465	178.077703006864
ENSGALG00000004249	GRHL3	-1.23389397162193	2.86128036056852	0.00219486658249069	0.00419883390791489	283.064273882808	233.385963395154	248.827907155179	81.2231971337763	130.423106427563	157.824085141114
ENSGALG00000004251	ARR3	5.29631293407501	7.38466370672383	1.0362077431417e-28	2.11759989172394e-27	142.467749004881	124.195794262679	359.809302304444	10849.8921033361	9515.47610730025	6683.2042182366
ENSGALG00000004254	TMEM120B	1.66112912218441	4.86025880862856	3.527954941715e-08	1.30374105299432e-07	372.659555011084	326.902741902674	353.557382054241	917.471979657966	1075.01120577175	1893.7720360518
ENSGALG00000004255	SNX8	2.14611115985424	3.29168645513154	4.19288841618827e-09	1.72328103699737e-08	91.1289653884893	100.716685912421	78.7557858786846	462.93018253689	385.246715902536	519.828461656168
ENSGALG00000004257	TSPAN15	-2.57483734251327	1.8681414582088	1.4385095178428e-08	5.56724591046078e-08	172.349618372194	150.788461946663	142.96691156723	17.9546014716769	29.2615943907993	42.5709703341162
ENSGALG00000004261	AQP9	-8.75133233189716	1.65317771135886	4.94073591721007e-25	7.87607938340831e-24	204.308488004124	102.766658778936	160.428519086892	0	0.836045554022838	0
ENSGALG00000004270	ALDH1A2	1.71057282018654	1.92114506099225	0.000116294108426747	0.000274157262720219	57.1045106255618	44.0495927909082	29.8188311870682	125.197373248669	135.241547501902	239.947252558998
ENSGALG00000004273	RALGPS2	-1.5871242085701	8.5904973516649	2.56512984735915e-08	9.63776690241483e-08	10957.069820756	16310.4738855822	16502.0381726113	4710.66345305973	5725.21558791709	5903.30654342123
ENSGALG00000004282	RCAN3	-2.14919143893151	5.98867619015712	4.41438371554575e-14	2.91428428169653e-13	2760.88317361988	2666.28283786387	2411.65495508326	793.411791674629	601.051658789945	580.21561449185
ENSGALG00000004285	HNF4A	2.04516224879086	0.986932313446104	0.000170791111474979	0.000391767988843418	22.8277640228071	12.4856688236091	20.7356589295983	53.0088233925698	118.718468671243	82.0269916193947
ENSGALG00000004286	COL13A1	-7.36000989306043	5.3056595266326	9.51892678434528e-69	2.17671596449606e-66	1884.54417454685	2594.37538119203	1468.5067408691	17.4616075196617	9.40479124706884	14.2127744183882
ENSGALG00000004288	HDAC4	-1.03965140310228	6.06318680245103	0.000138103074613053	0.00032134404887595	2750.20318434672	2153.69719557876	1902.00363540196	1028.97150246608	1250.96146844983	1465.62543267903
ENSGALG00000004290	ANGPTL1	-9.01555187107546	0.317172600014406	1.55243117654158e-17	1.38094531820731e-16	52.0821072714462	42.5760427320803	85.5257533873655	0	0	0
ENSGALG00000004294	CGNL1	-2.52699732384505	4.59683594589157	6.39893404878303e-12	3.46545783131929e-11	984.02561708488	1033.12476786453	1096.87406129588	270.842969865982	189.894981776321	134.232020526346
ENSGALG00000004297	DNAH1	-3.51267340507371	4.06004289455562	1.68818086440037e-16	1.38897908216762e-15	645.016866977142	571.019867230254	1096.39264411859	58.2699088015937	93.3851367167255	71.786075079979
ENSGALG00000004306	SYT12	-3.35225874035308	1.90576764029256	1.61675113307092e-06	4.93282039979748e-06	145.471926399974	168.20724863724	195.177382395001	13.4461048869636	33.8318645693446	3.41992408984321
ENSGALG00000004309	GDAP1L1	-2.7281925182219	3.60019212037221	1.45616286580896e-12	8.33898449448368e-12	660.448873380212	474.317057644973	453.710805746355	67.3684704596726	92.1452667110203	112.701289584919
ENSGALG00000004310	TTYH3	-3.26589405231067	5.83948155022356	2.74700496945401e-22	3.62522655819588e-21	2842.72857316717	2891.55853255126	2112.9404736254	287.461559996423	360.108036393849	244.034744061632
ENSGALG00000004324	SETD1A	-2.27025290676674	5.7224064412849	2.60450736164555e-17	2.27860033888555e-16	2492.78669853218	1961.96886290705	2160.20865932983	459.724754569112	424.090778586212	704.39960775983
ENSGALG00000004328	IGHMBP2	-1.43401649160365	4.90980895984788	2.19300113273405e-06	6.58198099648149e-06	1231.80842031525	1196.86392678473	887.158798808892	511.337734800466	436.688437891357	423.255954218916
ENSGALG00000004334	MYLK3	-2.5599644873022	4.0438686771865	1.28891038135844e-13	8.1094963889739e-13	891.424185090618	649.254778827672	588.237903318604	111.147532919904	117.88242311722	187.935259279879
ENSGALG00000004336	INPPL1	1.82339629391492	0.559382623054317	0.00150280055266581	0.00296205137910635	5.84377057106985	27.3207267765195	12.8193799363506	47.5735602141809	44.176046203064	102.161056570914
ENSGALG00000004343	HPD	2.08199393175304	2.1209147252782	2.27991913130959e-05	5.97128108976286e-05	46.7242357325666	57.0694100570178	19.2087212670909	210.630640705919	117.987381099591	287.599670583856
ENSGALG00000004347	NEDD4	-2.31909268702191	6.03400131165027	3.51720201667843e-16	2.80172074157394e-15	2943.73653418168	2953.19437176279	2362.3125650592	474.873874684972	644.794453109419	753.316212752635
ENSGALG00000004348	BRAT1	-1.78963479310275	4.38239125939266	1.07631013140434e-08	4.23342267877099e-08	920.664559065181	633.43314433326	887.938528681586	285.450011006965	214.549862394993	308.842998343264
ENSGALG00000004357	ANXA6	1.12144666182562	5.93335620911862	0.00157996098621088	0.00309732877165904	829.013336324893	1076.79112619969	1003.58214396133	1190.45954776366	3030.2249568218	2819.0981878211
ENSGALG00000004362	MRPL21	1.1007786052827	4.47897443105053	0.000303252288356828	0.000671122159265243	426.535732427666	286.322353140903	356.721573089742	779.228451099715	682.886332447877	1206.8634089106
ENSGALG00000004364	ABR	-3.94923220854913	6.28410878116535	3.54810179157907e-39	1.29637669591497e-37	3612.3025803022	4319.01295311511	3145.42810748613	205.173888356025	265.89909798531	346.958904919478
ENSGALG00000004369	PYGO1	-2.71102209774428	2.82456007860002	2.64224108613736e-06	7.82932160979442e-06	307.033426106756	290.051691133072	326.313790523678	92.3379504257667	10.0325466482741	65.4139300255932
ENSGALG00000004386	SOX9	-3.92711465261779	2.46424954676413	2.92886121075313e-12	1.63626848163396e-11	254.387505655085	301.326485101054	221.8607306349	8.73080375983085	9.40479124706884	44.3104143632104
ENSGALG00000004394	Uncharacterised	-1.96649805886312	9.8339721861804	2.20005180561051e-13	1.35717614408429e-12	36735.1146110509	33293.8420978515	39978.2944091336	8286.47834027899	9862.71793458782	14191.9215116051
ENSGALG00000004398	CARD11	-3.77337047351576	0.531460941780864	3.33149741448015e-07	1.1149545851186e-06	33.3929746918277	110.470764792014	52.4429179214343	0	5.522005775383	11.0173688458829
ENSGALG00000004400	Uncharacterised	-6.51899754462095	3.4841529137981	1.37595843114842e-28	2.79469168029425e-27	450.62855361831	528.503021952809	688.257085287635	0.960436063354544	12.0048551697674	6.83984817968643
ENSGALG00000004413	SLC39A11	2.57693933468356	5.80447514716652	1.04396082522139e-20	1.21031926791183e-19	446.634489911798	446.347501420208	319.800043661994	2952.06428751975	2196.46271627465	3132.26102609344
ENSGALG00000004416	TTC19	-1.0678488666352	4.64129013550282	0.000653132463305199	0.00136567804837094	1069.52346057928	759.223147945193	723.179404229755	451.667612081477	466.827774266406	438.919280953027
ENSGALG00000004418	SSTR2	3.07239124275384	4.32256246626706	7.11987886228655e-18	6.54407161126171e-17	86.9487376183751	133.942809100024	99.300773499211	1102.58060073102	986.580824860886	914.829694033059
ENSGALG00000004420	SDK1	-2.58438315347624	6.49039953053011	2.14167479319425e-18	2.05684524128424e-17	3053.13723120753	3992.95356601307	4611.16290862952	798.971740798249	437.958844889672	1058.60995587949
ENSGALG00000004425	SCAMP1	-1.41301656027263	6.38951186741637	1.54992835842643e-05	4.13283068311415e-05	3714.10108452261	3073.84590800132	2436.01750376883	1117.77408246543	1618.73806650827	1022.83154460489
ENSGALG00000004435	RAB27A	1.65564732922408	5.56999947179522	6.72062194503225e-10	3.00524642134062e-09	478.218056901063	565.882410538862	684.832920684214	2139.85154915392	1622.83814885856	2509.36930092246
ENSGALG00000004437	LHFPL2	-6.41555903466183	2.13172676636329	9.54701938430974e-26	1.60281162144431e-24	233.549000575475	243.669591401329	171.389338574682	1.03831634961259	3.42416460342107	3.84174425341818
ENSGALG00000004442	PPA1	1.31011131774028	7.68129328992306	4.22169398184985e-07	1.39631738856046e-06	2365.17287233061	3171.01813171685	3388.78156918572	7986.98630285639	6920.25333013593	10578.6801909075
ENSGALG00000004444	SHCBP1	1.26072746155993	5.01501795060056	1.74240046690337e-05	4.62281604171622e-05	429.727414767739	506.698378610944	501.069420300616	1165.00894484906	1396.92860157294	1269.64681835429
ENSGALG00000004448	BRINP2	-6.46563546866101	4.58301432888027	1.45807795428005e-30	3.44714579458402e-29	1106.00516690501	1295.62824946528	1178.65850757717	1.70996204492161	25.0813666206851	17.651377943414
ENSGALG00000004455	USP34	-1.66834174535777	7.51194805876939	5.50856213089472e-08	1.99454162003977e-07	8234.41501225113	7164.29448678183	5622.54211373649	2098.94453104826	2926.31482001604	2238.60030563396
ENSGALG00000004465	PALD1	3.78110131893718	8.93485459416427	1.36797852467483e-38	4.86420889350195e-37	1746.16075196617	1801.44501432491	1476.45644840433	27606.7551034996	16814.9309791997	36764.5320691486
ENSGALG00000004467	CLIP1	-1.72260920920377	6.69818575604106	2.03864172000872e-11	1.05619160673733e-10	4492.50395968844	3634.2900637336	3932.13574333382	1233.73761541094	1330.98452200436	1570.97263696385
ENSGALG00000004472	ASTN1	-8.89322865611714	7.11260555780023	9.40322607318367e-55	8.42668833842129e-53	7543.62239345432	6113.20248752224	7242.66277499234	3.00473695796805	30.0536772226449	14.2542922312276
ENSGALG00000004474	PLEKHF1	2.6550433569461	5.12884918600309	1.31260688827967e-19	1.36864034270859e-18	290.299225014376	206.905407435514	226.568345140189	1556.43620806927	1619.62985741817	2001.54875603087
ENSGALG00000004476	SEMA3G	-3.9600548997686	3.26446227290712	5.33368780700496e-14	3.50028210709089e-13	300.616487829972	578.415749088794	481.354315645432	16.7209110804568	19.7280106426392	69.6246802695617
ENSGALG00000004477	Uncharacterised	-1.42694000308936	6.20660279111593	9.67062682268648e-07	3.03505734853977e-06	3309.89026176457	2652.1811548998	2183.90054484553	1116.58622477949	1215.51029760124	1020.18856903743
ENSGALG00000004480	C11H19orf12	-1.32713740389728	5.03647464033671	0.000193206323146101	0.000439686936150779	1213.03074801679	1356.54863418372	977.243308672698	327.729857176952	696.710270590049	523.897184323424
ENSGALG00000004486	ZCCHC8	-1.94967545132632	5.97926679375688	5.02227141839029e-11	2.51454835115555e-10	3165.22144610257	1910.8713352696	2504.78181971373	551.870021280132	708.765887834043	989.485452384382
ENSGALG00000004493	RSRC2	-1.54959405114535	6.65460562649479	4.98217244672899e-10	2.25447127809507e-09	4185.45320528836	3875.01294287151	3304.86049400299	1435.1258680222	1279.05160960136	1714.72943130084
ENSGALG00000004500	COP1	-1.29810296464656	5.09125549193665	4.72535857142002e-06	1.35128138707943e-05	1291.20130461203	1325.05772614824	1046.61832471198	566.557792554296	551.870021280132	548.47960931327
ENSGALG00000004504	Uncharacterised	2.14804322680826	3.57175365855758	2.13959285086828e-08	8.11246997743453e-08	121.201410307315	117.171916823816	90.5608947162812	434.685279919378	619.439680533404	568.983831563168
ENSGALG00000004505	CCDC137	2.47310211556652	4.22949928210007	2.55015735414769e-14	1.72213528452448e-13	116.875411421397	160.36078760131	153.832559236207	801.70258879453	817.256854756684	1120.76688532208
ENSGALG00000004514	PDE6G	3.96440147887188	6.21509951752177	2.24881030232764e-33	6.20082557999408e-32	243.383693595412	171.138995295617	261.328690905839	2758.49748266745	4191.75924998283	5022.81645328838
ENSGALG00000004515	Uncharacterised	4.18844841937774	3.66049182277673	1.69934499963809e-18	1.64035027148472e-17	20.0650932965481	37.3793885860533	41.0899752410528	485.020211994045	854.527417993445	636.105880710838
ENSGALG00000004519	TRPV2	-1.70332319930894	3.22758087394419	2.82971176852134e-05	7.32158938468564e-05	387.291998405496	422.313634421932	268.922097739272	172.433374256659	88.0630453134627	115.374286455152
ENSGALG00000004526	TNR	-8.49904117738648	8.7069735130829	5.56014249893712e-101	9.21802124542538e-98	20572.5768832678	16700.0912065691	25792.5924319374	44.9305846467264	57.4288600639832	100.157898598935
ENSGALG00000004528	TSHZ3	-3.58170952479343	2.53923355373439	4.8808398826105e-15	3.51436370049202e-14	237.090120311977	276.770840823002	291.349544007969	16.7388452605451	19.8792207913788	42.0663174115527
ENSGALG00000004530	MMD2	3.50554007066398	5.16494439907894	1.79827537345517e-27	3.43173039973179e-26	124.597961953511	159.79434815965	153.669770136727	2451.17315557251	1251.69221688262	2021.55814962722
ENSGALG00000004531	PLOD1	2.54904482783396	5.71059123021194	2.5308865203012e-20	2.82076873266847e-19	458.326479356789	348.549487124294	348.121761162304	2825.91343484087	1899.59902693195	3068.49463381467
ENSGALG00000004542	ZMYND8	-1.11970243924189	7.15786471894028	5.27815096013075e-05	0.000131290540480522	5286.91014768213	4195.18472473265	5315.96813926701	1957.05156041278	2758.95032827537	2939.47358575325
ENSGALG00000004559	DPY19L3	-2.57596781424605	4.37551121757764	5.84276661313098e-15	4.17524857704505e-14	897.414771446458	715.444482772409	1070.259775028	189.959902693195	144.482664354179	175.599783657179
ENSGALG00000004562	HVCN1	-2.10367894343645	1.40099456312949	0.000176174896860808	0.000403489493535641	111.544516662737	112.176846430807	93.5003291371176	7.12714611561379	32.6311489288925	44.9305846467264
ENSGALG00000004569	UNC5B	-2.72567195045371	5.70348980416184	9.86920101273854e-12	5.26529416862234e-11	2061.05795398099	2747.32140014484	2038.04532643834	276.111668904651	560.012569711826	265.862486179262
ENSGALG00000004570	NCOA3	-1.76570355686731	5.59245319625366	3.79565873614675e-11	1.92585393334026e-10	2066.25096610451	1658.9076645056	1912.82280059267	530.836862574356	581.037759637802	782.798215031582
ENSGALG00000004571	PPP1CC	-1.35040975155224	7.77976663107081	8.11980511201693e-07	2.57453921110879e-06	8538.2766032219	8355.37919815813	7004.0045359989	2543.25057533747	3422.2906883231	4782.41656277809
ENSGALG00000004573	LRRC8A	-1.40366182481538	5.94851781539516	4.97682334324469e-07	1.63223560834457e-06	2152.65814735071	2229.1721030459	2395.51428160359	771.192882259645	1061.777853609	1027.93318611647
ENSGALG00000004582	MYL2	7.42938334088774	0.653134825349374	2.44685691750212e-15	1.81097451433206e-14	0	0.960436063354544	0	47.0239562353442	121.226605333312	75.7970935217191
ENSGALG00000004587	RC3H1	-1.20933181477415	6.09856312673727	3.63745210703382e-06	1.0556570524199e-05	2555.56818235326	2367.47489616895	2313.66299635518	907.134864830912	1084.35108356762	1612.50529094835
ENSGALG00000004588	RPS14	1.11372815587819	9.64576816389708	9.21381351866867e-06	2.53848792476324e-05	13819.7710013423	12380.9801862549	12131.0209888714	35668.2432418917	23723.7537607023	35803.1355697307
ENSGALG00000004590	CLCN6	-1.76400980916857	7.05319349279847	8.51981432461024e-09	3.39232354810284e-08	5148.17521084503	6015.78538467653	4366.19563743482	1473.27114087218	2037.21165750234	1501.01421239766
ENSGALG00000004593	SULF2	-5.01394537322482	6.76890376645587	5.99106737410261e-59	7.35736357247434e-57	5278.80032143041	5765.15180395994	4965.45444754299	216.087393055814	166.721299379857	173.89747523675
ENSGALG00000004598	CUX2	-6.92517381610403	6.07301035463974	8.83347281108787e-59	1.04605669547731e-56	3972.84238209266	3072.01860123794	3060.29560071726	12.0189478318722	28.3840284880536	57.0171689249104
ENSGALG00000004604	Uncharacterised	1.13386996051922	3.75584866367771	0.0038878848674178	0.00714790920384838	189.413249000905	229.715440255933	217.342639959689	382.349560221427	678.266738669246	461.497677708622
ENSGALG00000004610	SH2B3	2.83193929845509	1.85948566137512	3.53186245383355e-07	1.18052146484865e-06	8.31500380154943	36.1273434569881	21.143804539636	220.88023101532	95.1500036689883	236.255295944681
ENSGALG00000004613	P2RX5	1.23170787310396	4.24011649838108	0.00382247490303282	0.0070344782349	409.810901647793	297.176534888128	144.482664354179	1037.03268461693	631.99634015928	553.488555517044
ENSGALG00000004614	NPL	-4.35647329247428	1.06929112128763	3.51327402162081e-09	1.45842107507846e-08	109.282907106078	125.863003011442	59.9074461956352	0	11.0173688458829	4.17412183647846
ENSGALG00000004620	LAMC1	1.04625773935355	6.09126265293122	0.000154678734633908	0.000357342633243253	879.070058762365	1336.33989667759	1147.9172033914	2208.64658253614	1975.77366643204	3978.2717323497
ENSGALG00000004621	PREX1	-6.23241244993038	4.57698038587325	2.93416764130508e-45	1.51423600881826e-43	1455.12566527115	1276.1110027549	830.775320036529	17.6704184812256	8.01263188791481	30.0536772226449
ENSGALG00000004627	Uncharacterised	6.37173776961679	1.33790369651838	2.97334574487551e-20	3.29177667898864e-19	0	1.66964873459139	2.37571537187126	103.720437666837	107.481006409816	216.462626395014
ENSGALG00000004630	Uncharacterised	-1.02519597708953	5.62636009008555	0.000276305430732665	0.000614975487129944	1922.7929988358	1730.88184538647	1356.85488264529	759.129363052737	691.518688841986	1449.56301544825
ENSGALG00000004631	DRAXIN	-2.25596928049459	3.83768829088738	2.98726158668283e-10	1.38241627439548e-09	515.553556543864	601.952798896443	664.522463752058	149.521854349387	141.184101313118	124.41395357759
ENSGALG00000004642	NMNAT2	-3.05963201921834	5.63155064318611	4.02986942395144e-16	3.19474944231129e-15	2686.90485708795	2153.69719557876	1857.69322103875	359.257456965957	118.704372918597	491.743264437527
ENSGALG00000004649	TRPV1	-4.89422599527287	1.26916817281906	1.03132637881662e-14	7.21058606338686e-14	173.524724726638	98.3228175829924	73.5720087540097	3.11494904883777	5.70694100570178	3.84174425341818
ENSGALG00000004653	Uncharacterised	-9.11703225071524	5.5170227549431	1.9067605996049e-78	8.72047097674474e-76	1949.95810457245	2808.95636300642	2154.25809010424	0	9.40479124706884	4.18022777011419
ENSGALG00000004655	SMURF1	-1.9695284071496	6.72429413987999	5.25908114068949e-13	3.14477877227072e-12	4759.48615091417	3412.96244943957	4571.11638086205	1080.70372588251	1225.52217119008	1362.47276576817
ENSGALG00000004657	FBXO2	-2.32427977360469	3.92345698218475	1.35535360095357e-09	5.87836978726201e-09	852.597691719135	605.955286523557	449.970333972378	160.36078760131	137.516984771761	126.862827237816
ENSGALG00000004659	ZER1	-1.08918926916608	6.72722969733858	4.866516923698e-05	0.000121552945308864	3049.61341373117	4041.09184755302	3813.18283197629	2086.18871457741	1828.88831280685	1820.87059652864
ENSGALG00000004660	Uncharacterised	-5.88580217523702	0.793011071703724	1.58422115075583e-15	1.18978058451158e-14	122.588528213503	80.1263188791481	47.5849889358545	2.37571537187126	1.16539817603187	0.880991855818165
ENSGALG00000004661	SHISA5	-1.65931922453514	2.87217886259778	0.00040206380517102	0.000871335334637784	275.153832647337	372.092553571756	188.245468417491	156.063117206977	64.1235766845602	78.5882820781468
ENSGALG00000004662	DISP3	-2.93123622803442	5.99831085095855	6.04040354455455e-10	2.71204712970301e-09	3085.88107155815	3229.30604066744	2236.63035475746	316.025219420633	658.292565654383	189.470441389299
ENSGALG00000004665	KPNA7	-3.3323921899873	4.04469427183724	9.50215754598349e-14	6.06191031901775e-13	465.165724626441	1082.03601468106	719.366611452554	102.586944178013	37.6191649882753	127.914969765494
ENSGALG00000004669	ASPA	-2.65063415143819	1.22480006047109	1.92604432860314e-08	7.34127319991687e-08	100.433071563271	121.484127058426	76.1200029351907	19.2009604478009	13.066434545292	22.1425653446056
ENSGALG00000004676	Uncharacterised	-2.16649458644458	4.71983872081649	5.34573660266881e-12	2.92735361524345e-11	828.980596724623	1202.11197816686	1223.66808483347	305.704173968903	242.968254116852	268.423168245146
ENSGALG00000004683	TPD52L2	-1.00583095426977	6.71063551345895	5.3182256488707e-05	0.000132188206111267	3943.49623493993	3053.2262454041	3582.90359294059	1798.88007125753	1663.73065250545	2618.63383372295
ENSGALG00000004687	CENPP	3.29762820885743	2.92286989397099	1.3854924086434e-15	1.04884622236515e-14	35.0552645096273	32.558150324532	36.8235882640046	383.415999914487	362.968644597084	417.463636618955
ENSGALG00000004689	PKN1	-1.66537256313485	1.11728959362035	0.000277796536487391	0.000618086808158408	86.7136110733012	97.8934467866774	58.1454624839989	34.2364358073746	22.0347376917657	30.8885015899406
ENSGALG00000004691	NLE1	1.32569992968492	4.79644001965825	2.37727371503197e-06	7.08852996458387e-06	463.264497514897	368.265823626072	364.73062830872	1182.81363708704	951.500036689883	1287.29917436996
ENSGALG00000004704	TDRD12	-2.27179170310463	3.06271461553254	2.79426782848395e-07	9.42772175252673e-07	500.088085778901	223.75644979812	317.157068094539	65.1596681495194	86.1357927950842	90.9958560352305
ENSGALG00000004714	CPSF4	1.05712181574008	6.11955653640958	2.83424747328063e-05	7.3304649450314e-05	1327.08217149429	985.793118897306	1100.23594909405	2657.05153865862	2303.32138990124	3153.11159599297
ENSGALG00000004727	ULK2	-1.61086990888077	6.67620366775756	1.66593895685523e-09	7.15522939921339e-09	3397.68913154881	3930.02738328366	4327.00267052309	1268.73603969135	1486.4193401112	1523.57618202515
ENSGALG00000004728	RGL1	-1.04332039792444	5.79241158915724	0.00218363012313626	0.00417794090062842	1535.89998791477	2207.26414540437	1899.41844114396	841.553680168369	1334.10320933782	781.395607788769
ENSGALG00000004740	TMOD2	-1.33869159403894	6.99265204261948	2.85575151371619e-07	9.62048065187143e-07	5168.59740575849	4697.40544429006	3948.71925730863	2433.92039848211	1610.58027927605	2178.69285943832
ENSGALG00000004741	EPHB2	-6.57832355043621	5.88783481778884	2.13151406685463e-31	5.25469722466413e-30	2878.53349479873	3112.54422660558	2873.65180550931	6.0094739159361	52.5939351396287	43.9507343796184
ENSGALG00000004758	KCNB1	1.57113938784523	4.87221268046801	4.65895676083996e-07	1.53367444822587e-06	318.919051806176	407.524026223265	386.609488591889	1077.75825817874	1389.79349254469	1198.02932496077
ENSGALG00000004771	C1QB	-3.18552472190735	-0.195001920750308	0.000495410987713064	0.00105756251891813	25.9579087403148	52.5038572524564	32.6548261540545	0	11.9697343144512	0
ENSGALG00000004777	AIFM2	3.45406470935849	2.19802142520903	1.56563974004675e-10	7.46676730393387e-10	23.1924242566086	16.0252637758296	17.5313117132096	337.35158280572	209.771671685737	140.077705075088
ENSGALG00000004794	H2AFY2	-1.23337459270282	5.87992310666625	8.77364939801937e-06	2.42477416057368e-05	2209.00294571545	2105.21505658921	1934.8220538288	778.358410795262	1090.23216709322	1109.42933150843
ENSGALG00000004798	MPRIP	-1.10972105640596	7.58706519691289	5.72154632272153e-05	0.000141549839355075	4757.66406921815	7962.21006882654	7163.70258806793	3078.18554422867	2846.0417766324	4760.50492040738
ENSGALG00000004799	Uncharacterised	1.47378644103046	3.94223148098712	7.15966551262176e-06	2.00039274686965e-05	228.611039100856	216.3410609737	167.799697826434	690.145315528602	560.556522671332	677.482737124169
ENSGALG00000004809	PPIF	2.18517271844417	5.56314404730196	9.59352316932977e-13	5.59537809124102e-12	365.35190710798	482.817102569855	439.434457439037	2209.96338177881	2380.23537502389	1865.56859100947
ENSGALG00000004812	FAM129A	-2.0815095281701	0.353504373670149	0.000267459884846397	0.00059699098834025	50.2021216190274	49.5888993027266	49.3266876873474	23.8812760410896	3.42416460342107	13.4461048869636
ENSGALG00000004813	IARS1	1.42935675159831	7.49993752198261	3.68803396711487e-07	1.22931375988551e-06	2830.75216958142	1989.27961043742	2596.44711558509	6739.62499672234	5033.99093479303	11923.7154514219
ENSGALG00000004814	Uncharacterised	-2.0586933210161	2.97262936003347	7.67971753180022e-07	2.44317806726472e-06	332.524223348464	208.706091823923	409.810901647793	97.8934467866774	61.6694299072715	103.8137085772
ENSGALG00000004818	RPL6	1.27079143070273	10.0713738548186	1.22743321301097e-06	3.80272055691766e-06	17531.591586724	16351.7018079032	13854.4779245965	51624.1275929006	31278.3101534614	49576.0450518547
ENSGALG00000004831	RPS4Y1	1.49337035144294	10.6968707883422	7.21042760559615e-09	2.89705850751353e-08	23775.0699884894	21041.0829627604	21053.2991414031	80803.8549595511	48474.7569024309	85517.2270810886
ENSGALG00000004833	P3H1	-1.49769118084505	4.27348474832766	6.32758171265258e-06	1.77651812563317e-05	756.823617923381	782.49828697484	617.2962982167	249.977620652829	183.781993881429	475.958879875529
ENSGALG00000004840	Uncharacterised	-5.08174276269675	2.81293670333867	7.40042800193296e-18	6.78781995778955e-17	400.131118511656	261.682258409148	363.410722364407	12.5552702125439	16.3274130770273	3.27405140993657
ENSGALG00000004841	APLNR	1.87738589760995	0.432899530997645	0.0015275861953248	0.00300599046121556	6.6264069304596	11.0173688458829	23.3750822842794	67.707888098331	61.7661033296893	36.1206660885448
ENSGALG00000004842	NT5M	-3.67548423236546	1.23279116379771	2.50414112630918e-11	1.28880185324946e-10	109.335714352583	119.187899332733	93.5003291371176	7.12714611561379	13.9847781123825	6.16694299072715
ENSGALG00000004845	TIMM10	3.14864673170082	5.72436766350746	1.49481178137453e-27	2.87328821106816e-26	210.557053540541	321.380736127291	277.43737911905	2696.48270636509	2059.74522741239	3575.44160406579
ENSGALG00000004849	WSCD2	-1.84971570503633	5.46109536094054	4.66945856400251e-07	1.53636886465803e-06	1645.5942739805	1654.62189598006	1912.45087435637	786.643768821515	487.188496267445	312.545526886678
ENSGALG00000004859	ZNFX1	1.15656179895279	0.848460007039815	0.0294218368314081	0.0456934217675604	20.0357848150966	40.3871613218115	19.8117689925419	42.2876090792719	47.4892496682938	125.197373248669
ENSGALG00000004871	RPS24	1.13115526659834	9.91534883658886	0.000166021288655181	0.000381684928312301	15503.4411241292	11634.1123826328	18668.3713921644	40541.8717477968	21232.7847170736	57678.4547250305
ENSGALG00000004875	PEMT	-1.24471371328755	5.18084040471876	2.31227042469051e-06	6.91335496904197e-06	1406.19026380492	1265.85473150129	1184.11525992706	634.395918665916	484.070375779223	754.855986168354
ENSGALG00000004878	Uncharacterised	-1.81609886060112	3.96695926597247	7.13434207011475e-07	2.28116631812758e-06	634.316004289628	664.276960338168	538.286023904899	206.523015999324	215.33948198771	150.268386113225
ENSGALG00000004879	SLC6A11	-8.58575899162028	-0.0890776596013738	2.78883267097724e-16	2.23764595978047e-15	34.2778677149364	44.6476030333414	54.7866336547371	0	0	0
ENSGALG00000004889	SLC2A1	1.40327290798722	8.01309202631158	5.02765527170499e-07	1.64687063147995e-06	4247.69647958084	2677.28174591729	3801.14459499402	10093.5136026121	7537.76631838022	15715.62843674
ENSGALG00000004897	GTSE1	4.75692314393497	5.99390817720938	1.78707968152842e-49	1.15058436000541e-47	103.866326303772	101.806222715582	137.510159217336	2875.30117853568	2703.77132170986	5327.6011898622
ENSGALG00000004901	CORO1C	-2.56826201334022	6.86454871406863	6.93828567862296e-24	1.0145808484628e-22	5506.05668230108	4891.50087066469	4694.98972184904	951.593877998874	777.522365241239	1200.29370015216
ENSGALG00000004903	CHST8	-1.3328208927293	0.942591868711664	0.00269622349469925	0.00508894438739095	77.2107495858161	68.7584923858806	55.5024869165444	30.9232323421448	24.0378956637444	36.7322721610105
ENSGALG00000004907	KCTD15	-5.22962229664467	4.26509203539048	8.20348257204159e-25	1.2815405106359e-23	810.964187402153	956.289357993196	1059.20825065825	31.6943900907	38.19726644926	10.2597722695296
ENSGALG00000004908	Uncharacterised	1.16411498575544	7.9107686526161	8.83564318510789e-06	2.44038183182186e-05	3300.19549189484	4366.80216717288	3571.63066403802	7761.36214274806	8186.71517146838	13209.7883253213
ENSGALG00000004921	SLC6A1	-7.10427514917928	3.23888093375118	1.85097535830507e-29	4.09158102953336e-28	411.568413076777	522.657381811678	476.647853997037	0	8.8352092406128	2.0031579719787
ENSGALG00000004926	ATPAF2	1.87271513251358	5.18525919519972	4.23782729855093e-11	2.13874822909745e-10	363.573171914134	348.9565855296	465.640212886768	1833.17133089814	1131.19354287052	2045.35093920186
ENSGALG00000004928	Uncharacterised	-2.25810224501282	5.09667020748711	2.02146823612541e-14	1.37986274913697e-13	1286.02388883173	1709.05483598689	1284.18149573613	299.304308340176	242.966025809346	509.059137708599
ENSGALG00000004936	Uncharacterised	-1.0903949370088	3.49339676216635	0.0209773846282971	0.0336120925926717	380.082270979739	455.246694030054	318.674337233826	72.6733869091683	244.125301774669	300.073425038039
ENSGALG00000004937	VGLL4	-1.79392470673834	4.98625200436271	1.81057198251633e-09	7.74882742953019e-09	1547.53496643002	1132.84985476056	1039.20462365039	419.479805243487	270.509003670264	566.657277379181
ENSGALG00000004943	SS18L2	-1.3826049430044	3.7625579201094	4.65855136927697e-05	0.000116666100473415	522.824230686441	384.019208956019	571.359546935039	226.087246150184	162.98349332636	265.056277218384
ENSGALG00000004949	GARRE1	-1.08204965429017	4.60699417054485	0.000587365819004647	0.00124028544140402	974.575969691119	747.253413630742	777.522365241239	353.027558868281	489.655538289213	476.376287423854
ENSGALG00000004955	Uncharacterised	-5.84495809514908	2.71642304712554	2.22629674257195e-25	3.64535477737428e-24	392.637541192283	262.199045295791	315.40028582389	6.83984817968643	8.36045554022838	3.11494904883777
ENSGALG00000004956	GPI	1.84211287109184	9.63297652060459	1.23019460987451e-11	6.50820546899305e-11	10421.1292993028	8277.04874021599	7522.60237370149	37411.5778185427	33018.0611233351	35172.7188516844
ENSGALG00000004960	FBN1	-7.06055293825898	6.27772568529095	2.88904011525239e-69	6.96678891792591e-67	4924.9726919107	2968.94255410721	3758.27713072567	30.0473695796805	40.0715696301933	26.1328690905839
ENSGALG00000004963	TIMM8A	1.90664224900008	6.61636115360729	1.10402088755117e-12	6.40815274905524e-12	845.752181585438	1251.28650870179	1027.62003962507	3763.38824776898	4025.64969763586	5634.70018111411
ENSGALG00000004965	SLC27A4	1.44979177531628	6.02707283299839	7.35341046447041e-08	2.6330529964976e-07	799.940605082894	995.065440724017	847.335822146991	2096.24398627948	2439.85968691179	3806.1904429201
ENSGALG00000004966	NYAP2	-4.02489698093165	7.01605703374839	1.97418085988621e-29	4.34221571221738e-28	5721.31762940302	7286.94708804883	5448.7940561427	303.48453611029	547.192716245836	388.071988387721
ENSGALG00000004971	URM1	1.57779319378887	7.11026248484457	1.31454647019654e-08	5.12638336789671e-08	1656.75220928659	2012.45026664101	1577.43998644018	5441.82051113465	3807.50605402937	9357.10047294864
ENSGALG00000004975	Uncharacterised	-1.07015659824875	4.73083865559511	0.00013301752313845	0.000310272847236241	1013.55272261264	865.352893082444	838.157160943762	436.04032145501	438.92391586199	605.338431824141
ENSGALG00000004980	KCNMA1	-2.48507981736221	5.21280088251086	1.64076261996907e-06	5.00032964812724e-06	1510.7659276567	1860.75255131395	1385.92423740896	280.911306151674	495.276898765206	98.1593852980706
ENSGALG00000004998	RAF1	-1.51115545708256	6.40162805327592	1.04919249414089e-07	3.70091490685921e-07	2714.84884244559	3388.95797797436	3363.33913602799	956.757155418527	1395.96306001682	1357.13952601557
ENSGALG00000005000	COMTD1	2.99839007381266	3.60133452935177	7.62569332297294e-11	3.75285976039295e-10	47.7813252173068	69.598356609635	85.0388889408982	963.518984521755	313.059137735885	592.740985281881
ENSGALG00000005001	CNBP	2.27225183999745	9.60918933214664	1.64454636389581e-15	1.23429524839139e-14	6284.1105150869	6206.80219306555	7781.14272399676	40179.1474565428	22211.0444011372	53323.3839631669
ENSGALG00000005002	VDAC2	1.05488000035307	8.97355009425243	2.84044714457268e-05	7.34239809566916e-05	8542.22860826279	8545.57346193785	7642.18975611211	22393.4202934962	14835.6307017399	21589.2043415317
ENSGALG00000005005	MIEF2	-1.261824626086	3.31869137484136	0.00043526572420664	0.000936562897519953	358.733021152561	384.581398090519	316.276076238721	197.687806758711	122.192636290701	187.000658274235
ENSGALG00000005014	Uncharacterised	-1.02250786813321	6.32815490233793	0.00158944285118881	0.00311339248786253	3602.54790140021	2675.23561927985	1871.90599545713	1801.47886657785	1472.39077947106	1152.52327602545
ENSGALG00000005016	ZNF608	-1.78725002147818	6.71563512145877	9.46594652511767e-08	3.35249239339238e-07	4879.52216304546	3950.36748148865	3505.36926621313	754.188976449981	1068.57519013849	2439.85968691179
ENSGALG00000005024	Uncharacterised	-4.39687524023016	3.77840063719753	4.70392838429897e-28	9.2948388709023e-27	606.122396802897	758.723593537624	610.963181453504	30.8885015899406	38.0114459499402	36.1273434569881
ENSGALG00000005031	DRP2	-4.76997561852719	5.35616683819598	7.00571796284481e-42	3.11801467587956e-40	2445.27021730067	1822.55528486469	1709.10706389915	53.5069154574616	79.9503589201695	118.704372918597
ENSGALG00000005035	KAT6B	-1.61861889616864	6.16812635753311	7.72683427276632e-09	3.09610280845014e-08	3337.34973719534	2553.82831409042	2316.68223019728	995.745379278475	1020.40105181948	964.277807607963
ENSGALG00000005038	CENPI	2.8182169960436	4.20845334093709	2.08537560171148e-18	2.00422729025358e-17	118.870613955251	116.290924967998	110.44011550766	819.291610539289	763.864296075559	1238.93556643086
ENSGALG00000005042	IQSEC1	-1.2857117600649	6.88752966592661	1.28583311355618e-06	3.97344002448641e-06	4107.57947906741	4783.55795097923	3815.8124797076	2139.04692115856	1843.33908442549	1852.67694771461
ENSGALG00000005046	SHMT1	4.70983563624371	4.64576321552235	1.12931363202235e-40	4.51147189804592e-39	46.1689752128834	34.2778677149364	58.1457155783051	1313.73781951255	1166.92981697577	1691.59322846723
ENSGALG00000005054	DKC1	2.54745613333712	8.53736006400498	1.43931162147959e-21	1.78908997522809e-20	3027.16356606496	2885.54905863532	2304.11525373611	19741.0068825643	13152.6838146957	22724.3039289737
ENSGALG00000005061	PPM1E	-1.48471344394642	4.6388258986596	6.04080201133629e-06	1.69996089701577e-05	844.87118972962	988.439033793557	938.479509872022	238.759769046568	412.186617019664	468.490066764813
ENSGALG00000005062	FOXN4	-1.60895755661527	1.26158809910241	0.00040089072880534	0.000869077106267608	112.409098407822	82.0781781562371	71.8999176459641	25.9579087403148	34.2416460342107	38.4174425341818
ENSGALG00000005063	ST6GALNAC4	1.55961283350313	1.01318649159531	0.00548703210620978	0.00983306402170791	18.2622112182457	34.5756982807636	20.7356589295983	79.5132350888547	29.2615943907993	158.862401490726
ENSGALG00000005065	PLA2G4A	2.00744038937415	4.20980601004933	8.46963215167762e-11	4.15739197733902e-10	203.995115181572	186.896942930266	164.359900964211	821.172834168135	697.372950316489	1049.06171455941
ENSGALG00000005071	MPP1	1.63694981338061	6.63254256155779	3.64629362256817e-09	1.50938802484774e-08	895.404788358459	1172.25915871262	1581.96404678053	4489.07816011914	3394.09996163424	5175.20012895524
ENSGALG00000005077	F8	5.90027084275398	2.56699944998037	9.76052280497108e-21	1.13755548297303e-19	3.84174425341818	4.36540187991543	5.98486715722562	148.816108616065	337.452813624092	520.473019720002
ENSGALG00000005078	NUP210	2.77517943602134	5.22676728387773	4.88040073465408e-17	4.18708484977322e-16	171.973819662913	288.649417682359	259.883793255108	1315.32084073652	1931.59762022897	2357.71693301893
ENSGALG00000005080	C8H1orf27	-1.05978555327198	5.27508869695601	0.000163943119156469	0.000377365079724445	1381.17742167931	988.4320508781	1584.60215303813	761.005008948814	586.740575974898	821.67445937699
ENSGALG00000005084	TRIM37	-1.39977579476333	5.46067124273092	1.63632934923978e-07	5.64291111777619e-07	1772.57587637097	1400.31578037093	1655.57866295793	602.761620834866	564.330748965416	956.289357993196
ENSGALG00000005086	PLAU	-1.15272123482063	1.88631156310405	0.00830774175369186	0.014435422360699	159.79434815965	109.489711222418	110.226397467865	85.4981022460803	36.7860043770049	75.7970935217191
ENSGALG00000005088	CAMK2G	1.05016131162434	6.46798651878314	2.63791487546657e-05	6.86416813680853e-05	1616.40727015621	1213.12578546161	1530.70000093617	3357.2927610363	2658.08078546949	4436.64845696959
ENSGALG00000005093	Uncharacterised	1.17026130517187	6.14461685558001	1.02940468118137e-05	2.82028388483959e-05	876.565585660477	1200.92412048092	1213.17950124918	2397.17883968123	2236.41233903012	3998.30331206949
ENSGALG00000005102	CDH4	-5.32452831072276	5.90193702726092	1.8369761250124e-46	1.01515893108498e-44	2573.37721084486	3399.34675532577	2852.49695209767	45.9153402012631	95.0286148748506	108.382030370964
ENSGALG00000005107	Uncharacterised	-2.17053736196882	6.51323998962254	3.08504115755948e-15	2.25935399628445e-14	3569.73160996809	4432.010385028	3309.66267431976	1174.29310569725	698.519495350476	997.402345949246
ENSGALG00000005121	TAF4	-1.56779278442398	4.68617244854989	2.12940171186606e-07	7.27330798467153e-07	1115.13627251413	920.097748693654	873.080375983085	279.578794344683	347.794950473501	499.430164163656
ENSGALG00000005134	ZSWIM8	-1.42144115627814	6.20926740652368	3.90316728212942e-06	1.12882048981427e-05	2126.06384388008	2948.81843289976	3072.61703746984	1081.45100733722	1312.89461538456	938.769162661962
ENSGALG00000005135	SERPINE2	1.42490826722439	4.31881796007269	1.68249380378731e-05	4.4746170683038e-05	215.384686762289	350.418017351012	250.560607846853	990.234845939617	553.304978693377	996.571091059404
ENSGALG00000005140	RRAD	-2.99974749781325	4.26208720606619	1.78076884561117e-16	1.4597241779568e-15	954.9316612315	943.899048796727	676.360853204476	117.329747506223	133.542419533422	104.687530905645
ENSGALG00000005145	SS18L1	-4.615156067811	3.83367834336077	6.3202908705314e-25	9.96742185682022e-24	836.251810898685	717.885276435635	512.737260086172	30.9232323421448	38.0600014675953	23.3750822842794
ENSGALG00000005147	AMY1A	-4.22249918064497	6.07729550590771	6.49450585706685e-36	2.02674426311242e-34	3445.13364801458	3646.73530264344	2606.62347594423	246.645206215222	177.836052671847	152.996336386179
ENSGALG00000005150	PTRH2	1.0055680963842	4.73493780419194	0.00112684202452087	0.00226409722333288	303.942190257267	519.068542886002	512.808440826548	899.105843577461	827.936807097136	1383.32763494983
ENSGALG00000005156	Uncharacterised	-2.11896120607432	4.28726667705732	2.50786716113838e-08	9.42795979540204e-08	719.618604608887	757.853203626933	917.168364537085	192.937216424178	256.221067977771	148.233689926424
ENSGALG00000005162	RNPC3	-1.51653314795319	5.40508441857094	1.67274234397701e-06	5.08960351185296e-06	1898.19658212514	1702.64673518257	1147.93238813107	597.481024896441	689.086342360673	542.6358387422
ENSGALG00000005173	TUBD1	1.20398087607239	4.17462216160861	9.60923861191263e-05	0.000229717613031358	273.077199948111	299.043708698773	251.634248598891	768.310730865115	639.525804800681	735.720087540097
ENSGALG00000005180	Uncharacterised	-3.60657862238231	4.68495922079479	4.32322965675327e-31	1.04252718068216e-29	1216.63799496172	1106.08826797221	1268.82257922659	116.421596516316	90.2809899553272	130.962056397463
ENSGALG00000005188	MINDY4	-2.65601188816209	2.52888399389812	3.40436612721177e-06	9.919180128561e-06	270.831552393324	268.041580487331	207.914077973087	33.132034652298	71.1121080052439	19.2009604478009
ENSGALG00000005203	OLFM3	-5.13190324374805	2.90421478143169	1.51221895236536e-24	2.30535172014043e-23	475.828804910782	326.602750580027	292.615943907993	14.5364288945763	9.13110560912285	11.5252327602545
ENSGALG00000005209	AQP1	-6.68883428164865	-0.0488711525758906	5.02225631400517e-15	3.61226602454721e-14	56.6657277379181	46.9280702090908	33.3442598759713	0	0	1.14138820114036
ENSGALG00000005214	TERB1	2.12159580895937	2.67187873376171	2.52016228295274e-05	6.56936170573942e-05	94.7352206946496	34.5756982807636	48.0194206790697	237.684724244103	166.373065250545	530.579654652034
ENSGALG00000005217	MOGAT1	-1.48488962667737	2.54958529409322	0.000686285703610861	0.00143116466776586	168.269444461269	192.165800983328	285.450011006965	55.0984082415157	89.0893264451724	120.036012131283
ENSGALG00000005223	ADCYAP1R1	-4.21511928605367	2.0181333368608	8.84764411559768e-07	2.79395961678981e-06	236.736127711671	228.277640228071	109.489711222418	3.27405140993657	25.6494306738241	1.67209110804568
ENSGALG00000005230	MED13	-1.78712885283122	7.72183164850281	5.27303706088184e-09	2.14068841562522e-08	6686.1083576712	9836.64949723297	8251.01908630567	1830.70107639015	3030.47676953019	3203.04959719394
ENSGALG00000005241	DYNC1LI2	-1.8530487335063	6.76232360432622	6.47569309641209e-10	2.89865398372304e-09	4366.12025012095	4541.58365233748	3958.91745314743	1392.56319969302	1468.0024155652	1043.3848514205
ENSGALG00000005248	CDC14A	-1.73294220190746	4.96683550744335	2.19000911769538e-07	7.46646090772414e-07	1090.20340244578	1234.55813968937	1306.88949030571	429.314920319481	464.915300210993	297.53339581636
ENSGALG00000005249	BICD2	-1.43929186114572	7.57306134928514	4.65642563648573e-07	1.53322177797195e-06	7643.56039428515	6866.82552794299	6548.36233706741	2968.45635715315	3125.59790811749	2467.65818814668
ENSGALG00000005256	EPHA4	1.27008074162348	5.60159151989768	9.69993740672579e-07	3.0422983688872e-06	665.175235474505	693.081764284933	792.235374754407	2051.07459744922	1726.86404191147	2101.94100517928
ENSGALG00000005257	Uncharacterised	1.85493785291746	0.294425269383964	0.000382845537812499	0.000833226184444893	7.01105290192545	15.8616629786182	14.2542922312276	47.7813252173068	32.5966986652721	79.5168831655152
ENSGALG00000005258	SSTR5	2.31725009836013	1.01171795394136	4.77980948783206e-05	0.000119477220575041	22.2295065839809	10.0325466482741	16.6130615938015	107.290490907193	106.608403032354	50.2021216190274
ENSGALG00000005259	VIPR1	-3.3690319864452	3.59408507184693	1.39547469086636e-07	4.85524155953844e-07	417.412183647846	647.38243883492	594.353069776256	74.0033158887258	81.7256854756684	11.0173688458829
ENSGALG00000005263	SOX8	-2.58233551674416	2.97195797980268	4.84086868174283e-08	1.7599901679264e-07	306.483169712741	292.188528553493	412.186617019664	83.9086686742949	22.9057882512723	94.9784993365876
ENSGALG00000005265	SYT9	-8.31037297870079	4.82353524348241	1.95362982212791e-70	4.888866477525e-68	1174.36214380561	1689.7337672672	1403.21215937108	2.50447310188708	2.37571537187126	10.4885835842869
ENSGALG00000005283	SLC25A36	-1.44074961635082	7.43806388064163	1.57571348957868e-08	6.07520000357036e-08	6717.90678199346	6737.61455133152	5729.00111790986	2872.43443698435	1853.59885669502	3503.03087135569
ENSGALG00000005287	ZBTB47	-2.41657412998827	3.71895658934922	3.95146834478987e-11	2.00108150656541e-10	619.991829648957	503.92734152799	547.782972917994	131.206847164605	114.37093831951	103.3436186764
ENSGALG00000005290	TRMT13	-1.08268378968466	4.33670635053518	0.000514736474138175	0.00109687497694322	721.532329915077	713.443146179484	637.004235089227	277.996514309466	311.218713715136	551.233337263076
ENSGALG00000005291	Uncharacterised	1.96284403928038	4.85909468343926	7.15033032215553e-09	2.87378275947724e-08	297.77524726654	295.979509560529	300.473695796805	833.989542928397	1576.28714923658	1470.73249815223
ENSGALG00000005298	Uncharacterised	-4.3274435815093	3.09454397763805	5.96144988584497e-20	6.48619440820031e-19	331.25293778763	514.650938265696	379.598435689964	20.8706091823923	11.8785768593563	39.6235379850837
ENSGALG00000005299	ANXA7	-1.56266122996494	1.85010587494888	0.000972194975028564	0.00197431051198956	177.140522756845	97.7900959958163	125.901731678732	52.0821072714462	58.4377057106985	38.0114459499402
ENSGALG00000005303	Uncharacterised	-1.80441222060179	1.89484690708035	1.14976822647818e-05	3.12936096609482e-05	133.210005136584	131.067425665424	166.300076030989	43.1197325131793	40.5256253676356	57.4288600639832
ENSGALG00000005305	ACKR2	-2.62064939256619	2.18671376820531	5.16380887586998e-09	2.0995584647659e-08	206.591264406404	194.008084797618	185.529579896406	40.1841080556578	17.5569566344796	55.0307665294673
ENSGALG00000005315	RPUSD1	-1.6625721770489	5.47745275479049	9.65974588248171e-09	3.81528319354839e-08	1585.50906585843	2107.0026193051	1428.16842620821	753.031824285411	454.849903949147	637.902757719425
ENSGALG00000005316	SRFBP1	1.10629420575163	5.17311798597614	0.0055235354416761	0.00989313309425391	668.672818565987	701.294733473641	359.566855970177	626.11827547177	1412.36278857747	2295.83440678279
ENSGALG00000005319	CDH8	-8.56156025695607	5.8895669824184	1.75486863375947e-44	8.91755658603518e-43	3904.68903610116	2441.42847304725	2599.59681948964	4.27490511230402	19.2290477425253	1.03831634961259
ENSGALG00000005321	LAMA5	3.24074532994423	6.99737430500479	1.33235314132681e-22	1.78856272403011e-21	732.296165355813	766.91797714734	351.139132689592	5732.54456621112	5480.94614187599	9041.54510041968
ENSGALG00000005323	DIRAS2	-6.19266030114478	3.97657795983419	1.26103006936262e-17	1.13007039256463e-16	1010.12855800922	734.733588466226	599.151408018392	2.56494306738241	25.917412174708	4.15326539845036
ENSGALG00000005326	EIF3F	1.39303792403641	8.18530917889806	1.04048389323199e-06	3.2493378563541e-06	4054.62534523717	4344.1234935402	3752.4236995262	15753.6440341448	6964.6754089657	14470.2764490273
ENSGALG00000005329	MFSD14A	1.00668636473418	6.76314324646772	0.000616014321220623	0.00129541746350866	2074.40875333674	1399.89605889506	1985.71327682773	3948.22436277002	2445.20057180908	6718.52307165194
ENSGALG00000005330	SNCAIP	1.15902361060979	6.29167564674977	0.00540043373900981	0.00969096910844095	1432.87656246538	1571.69155297027	662.700883714636	1374.01024170338	2520.48405421445	5920.87461358974
ENSGALG00000005331	GJC2	-5.33071424599919	2.27085129876174	3.98684840653718e-21	4.80268577801113e-20	283.840284880536	272.01941007926	150.336364708112	4.40495927909082	5.522005775383	10.0157898598935
ENSGALG00000005332	CACNA1D	-3.91883216273087	7.71886775973457	4.87488364836008e-39	1.77138580351232e-37	11101.5830248796	8338.58791531893	10468.6185489711	656.034235823025	772.212539748516	788.73750346126
ENSGALG00000005336	GUK1	1.6083983006488	5.02866586509478	8.36442710222355e-07	2.65020058902988e-06	482.376907730655	345.412333074165	389.597228174643	1378.88411228552	1575.11571757369	1111.22452530121
ENSGALG00000005337	SNX2	-1.66129643948757	6.63927289302042	3.46281465647693e-08	1.281453984064e-07	4600.5728176287	4385.39333640794	2480.87306598395	1168.45642207104	1402.21058038509	1503.51868549954
ENSGALG00000005338	RPS21	1.3712159689619	8.08289007899618	4.47303881520508e-06	1.28355503691183e-05	4891.39271583426	3685.81066844081	2869.2913503953	14441.9737456054	7066.97453945729	12731.2133084283
ENSGALG00000005345	CABLES2	-1.54214095856262	2.10127803763563	0.00125424097533045	0.00250263247416996	161.353258643563	169.159322846723	146.201754840797	30.0976399448222	79.9503589201695	71.9074566718424
ENSGALG00000005346	PPIC	-1.94158955534062	3.55457976861361	5.62081065897762e-06	1.59020502922398e-05	424.090778586212	601.05598908343	379.919805386391	70.4793484654532	130.319336299039	226.356850833593
ENSGALG00000005347	ADAMTS18	-5.34570637869418	3.39639923230869	7.60878565816571e-30	1.72210450826368e-28	407.394291240298	491.773081977352	649.126784049754	10.571902269818	12.1484127058426	21.0331587057764
ENSGALG00000005365	NARFL	-1.26359008679884	4.0537565453236	0.000212534158680678	0.000480620724054874	495.050849806346	629.564573545885	643.299793169595	194.699200135814	298.188311870682	339.53527625039
ENSGALG00000005367	MRPS22	2.17372204980978	6.03706470753955	3.48969228369107e-17	3.03102742361458e-16	595.92177265518	564.330748965416	640.641187710969	3213.0077862101	2288.71913897388	3910.30873393424
ENSGALG00000005368	CEP120	-1.33896608348875	5.09670701125756	2.06352020311626e-05	5.433485895162e-05	1450.28637171258	1155.39692433724	1101.14407486233	358.942638217817	608.765372370352	686.937518457645
ENSGALG00000005369	BTBD10	-1.31805913380248	6.38455003325704	3.66454133258722e-07	1.22271224387684e-06	3334.20418162719	2383.96396184395	3302.15945367903	1342.11584122573	1222.18287372089	1548.96642246006
ENSGALG00000005377	WWOX	1.22041344093732	4.94624474135684	2.6815778964085e-05	6.9573097887453e-05	510.951985704618	516.208772299999	371.061763747989	1227.31487330553	841.036243186199	1754.31366515273
ENSGALG00000005378	ARNTL	-2.66825910309128	6.67088668248507	1.04430981865984e-23	1.51043414666145e-22	4126.72085465673	4332.89412693334	4860.03096045564	763.546670366863	763.9453289852	831.896534854362
ENSGALG00000005383	BRCC3	-1.11963843488101	4.59295225505605	0.0009146335829398	0.00186656181112949	671.344579880339	847.266141283874	975.886911975005	387.055733531881	503.112566660253	370.206782725528
ENSGALG00000005400	CACNA2D3	-4.21995577261631	4.605715391604	1.43515995943882e-34	4.21117843850378e-33	1076.08860944415	1235.37199337306	1180.54835232029	54.6214950607262	55.22005775383	109.172109472839
ENSGALG00000005401	WNT9A	-5.29033793038587	0.447652433573817	9.70045105853252e-14	6.18246431471969e-13	40.5256253676356	64.0552669944428	89.1405297530522	0.834824367295693	0	4.6615927041275
ENSGALG00000005404	LRTM1	-4.27659072052518	3.3944722922423	1.22005959583518e-10	5.8629168186819e-10	366.786858635685	361.171679337866	776.660629510218	17.1208230171053	51.8635474211454	10.9135046997886
ENSGALG00000005412	SNAP47	-1.84016820814844	4.87272844366845	4.20468178997387e-10	1.91506506114091e-09	1193.89205839281	979.644784621635	1286.70220410507	301.808300928664	294.288035016039	530.579654652034
ENSGALG00000005414	MSRB1	1.48004528218358	3.8712142164587	4.53018265941824e-06	1.29910946187814e-05	204.390110549814	206.523015999324	170.26842761819	621.944153635291	460.888782143025	797.132352405802
ENSGALG00000005415	TEAD1	1.93815791971593	5.07960643453642	1.27238896038789e-10	6.09671054249443e-10	459.458547861099	329.167693647409	268.370622841331	1426.6466643677	1139.10542473808	2165.7833228645
ENSGALG00000005416	TTC39B	-2.26084418621578	3.67856240144508	0.000274533698420043	0.00061175074632813	523.434878294399	571.359546935039	502.286613869738	42.2876090792719	237.446248341469	59.0931601733717
ENSGALG00000005417	JMJD4	-1.04495511367918	6.70969948151378	0.000429515165613977	0.000925383307592296	2988.02681007762	3586.34467156189	4089.5939246859	1900.70296937864	2181.60958948773	1588.55473973217
ENSGALG00000005418	FRRS1	2.03434849005099	4.15927881893515	7.16085457796561e-07	2.28854010283272e-06	115.205762686806	199.560091237186	213.267866213833	572.644706281807	1052.494300788	736.160554702173
ENSGALG00000005419	ERC2	-4.28676458079313	3.70167169464092	7.64477425585145e-16	5.89835025918312e-15	804.325296374417	486.484201780197	575.199341167713	30.1111741387651	53.6452454535967	17.2878491403818
ENSGALG00000005420	AATF	1.16137032253737	5.75063962241303	1.70491288131999e-05	4.52969942807432e-05	731.223240329077	928.801371419421	854.346875048916	1664.63978838761	2025.29735452025	2743.34730637903
ENSGALG00000005421	Uncharacterised	-2.50192087750887	4.35571734399093	2.73763019608822e-14	1.84217094321248e-13	1059.20825065825	824.054142358199	745.392370995559	205.195445390593	119.554514225266	211.816535320969
ENSGALG00000005423	GRHPR	4.77989002231753	5.83558165890588	5.00838669698877e-41	2.05653971399882e-39	100.442161700351	116.2127636659	86.2166871283297	2269.11963361097	2197.96376152604	5491.65517310099
ENSGALG00000005425	OGT	-1.89474766046982	9.4417318863812	4.1769615823105e-12	2.31118237238983e-11	33612.5031248788	25558.8026854433	23818.9378341107	8704.20595880235	7884.70969347758	8500.81959675107
ENSGALG00000005426	FREM1	-6.79825885946036	2.55323498180959	1.75021412349559e-23	2.49871796769881e-22	311.844991650519	358.219140616344	203.167099802983	0	6.54810281987314	1.70996204492161
ENSGALG00000005430	ALS2CL	-3.1915690433873	4.31268877030424	7.92363558573627e-09	3.16921528267853e-08	1128.69798048829	848.33740113298	727.966848281844	86.7136110733012	179.471319108909	38.7636416559992
ENSGALG00000005438	PARVA	3.07959807008345	5.21782680018864	6.12981988661284e-18	5.68530078015007e-17	164.745477037997	269.47388183869	160.252637758296	1293.14294494103	2172.59170757627	2154.82122748294
ENSGALG00000005441	NFIB	-2.62889551341344	5.65486190604332	2.9377234050402e-13	1.79553113000222e-12	1964.61183847451	2777.56890501765	1817.86585957067	325.58150324532	514.342378010129	307.665118472415
ENSGALG00000005442	PALMD	-5.23578953966092	4.28858400975735	7.38041271972522e-18	6.77414629077617e-17	1032.81707513265	874.503649507889	966.672521489322	23.9691522239475	48.0218031677272	6.54810281987314
ENSGALG00000005451	HELLS	2.37152840598166	6.40938105753735	1.93044383723577e-17	1.70917734400921e-16	655.770444227436	551.790065655073	873.224050024189	3805.38826260195	3051.30537327739	5719.76781315919
ENSGALG00000005452	TADA2A	-1.2093243451734	4.54011612975945	0.000127648329652957	0.000298694388882705	939.310929881691	710.960427645259	801.795238585612	379.598435689964	427.430076055395	369.423740325982
ENSGALG00000005460	SLCO4A1	-2.21389529273469	4.56387016559198	2.98356351941875e-10	1.38118683972254e-09	952.255886032012	1024.81823706763	961.04886536018	196.889392987682	294.664626894291	200.065559255828
ENSGALG00000005464	Uncharacterised	-1.45305893458788	7.59396851147769	4.55097770475838e-07	1.50073638235232e-06	6891.12875456886	8669.68813351204	5864.31483305865	2115.19525167778	3020.46226102303	3760.87412275747
ENSGALG00000005467	HSD17B2	-9.32590524880346	0.614875242225617	1.71408754576415e-21	2.12268376465638e-20	78.0816777941356	70.4793484654532	75.0992785452088	0	0	0
ENSGALG00000005468	SYNRG	-1.04248165949292	5.97191609578356	7.21851356176311e-05	0.000175926397224668	2391.15752178843	2265.53405420596	1736.4349478176	1245.7645029264	839.323190259076	1519.38034847816
ENSGALG00000005470	PLPPR5	-3.23057132350657	4.8425069396073	6.06772532185216e-22	7.79053639339063e-21	1284.02426003835	938.342588840359	1693.88506014421	160.824948292399	142.720680642543	168.97337672672
ENSGALG00000005475	Uncharacterised	-1.04575616047491	4.86986717295996	0.000804587254571929	0.00165908593864855	1151.66069495062	901.849463489917	923.282497602113	459.979790083912	345.286813811432	917.87165305753
ENSGALG00000005476	PTH2R	-9.89730952946074	1.16925077896139	1.69672355093714e-25	2.79548378336389e-24	118.186320346743	111.031640850327	103.3436186764	0	0	0
ENSGALG00000005481	ARHGEF3	-2.96778472927721	3.40049156300138	2.36076226616729e-13	1.45226298405272e-12	442.257911620719	511.337734800466	456.720017611144	94.3351535044133	49.8900228092966	59.4353069776256
ENSGALG00000005483	CDH13	-4.98124877930266	2.91306771802574	1.0153862363854e-25	1.70253699787352e-24	353.962143298773	329.401948284998	414.288223495424	11.4138820114036	13.4461048869636	14.1875561097251
ENSGALG00000005490	RPS2	1.72919073507867	10.593434716912	1.7534564895414e-10	8.32656406043236e-10	17569.6030326739	21439.8302444584	15208.562406989	80363.958851459	48094.8213282226	78668.004603375
ENSGALG00000005502	KCNG4	-4.62934741014016	2.70873614687113	2.39987289587839e-09	1.01659259719052e-08	420.776840084185	283.446853034986	239.594593413864	10.6907191734207	26.8041580487331	0.880991855818165
ENSGALG00000005503	WFDC1	-2.78098386032841	2.78227218905057	1.4470380387663e-06	4.44157961308896e-06	330.390005793963	317.582986763847	253.929363670859	29.2615943907993	83.0653079690073	23.9691522239475
ENSGALG00000005505	PIK3CB	2.31582893321157	5.41379848337832	6.95800242427709e-16	5.39357020182274e-15	285.091533921788	384.177049356659	407.475587807107	1993.86526752403	1937.14708421247	2104.9632772985
ENSGALG00000005509	DPYD	3.04198374593653	2.34678115640568	9.30865520186034e-11	4.5286131178121e-10	22.9057882512723	38.654040427681	20.031579719787	189.505131376122	215.002241154349	382.250601738455
ENSGALG00000005512	KIAA1671	1.1118849311497	6.15294289681066	0.000539237665453473	0.00114485499550335	1293.59197539538	792.01167838053	1317.55057800638	2745.32800059681	3126.41725552237	2177.34313832001
ENSGALG00000005519	TLL2	-4.51840245000102	2.64475075992704	9.34469929802547e-18	8.46576139273988e-17	272.763841992691	325.222440053699	302.663281951124	6.6883644321827	9.34484714651332	30.8174814307896
ENSGALG00000005524	NTSR1	-5.87971199323712	4.50128609708666	8.92297597457897e-25	1.38903087266245e-23	756.350876769898	1396.9206386603	1209.68330672109	31.7157068094539	24.2968254116852	5.00789492994675
ENSGALG00000005530	VEZF1	-1.05394967250081	7.02287428011478	0.000159209243672383	0.00036697813674432	4616.81615654529	5140.26071360042	3529.3616607182	1968.88727972378	2583.33107783613	2611.49620420914
ENSGALG00000005531	MRGBP	-1.24485403263817	5.98515869975064	5.21512663943704e-06	1.48370475522847e-05	2324.69340007092	1728.10616016521	2683.00944739894	1191.60928199053	893.205538919726	1147.00934394778
ENSGALG00000005535	TCOF1	1.86091756881285	8.02516301877138	6.13230644083346e-12	3.32921736900427e-11	2650.80353485854	3295.87841933615	2565.79804840487	9504.16585813162	9424.79750543349	17175.6096507601
ENSGALG00000005540	MICAL2	1.51935141569797	4.63685214983554	3.07242523043483e-07	1.03241894682689e-06	382.250601738455	279.274418294358	309.232323421448	891.405297530522	935.838115738472	1371.97562725566
ENSGALG00000005547	PIK3AP1	1.81648376794199	0.258285491494578	0.000734358298834633	0.00152541802935689	11.4138820114036	20.1691573304454	5.45675234989428	46.1689752128834	40.1301865930962	65.4139300255932
ENSGALG00000005549	CUEDC1	-1.19538465186687	4.8794491822915	0.00387812196684849	0.00713094851605595	834.299287459802	1206.00606134365	1054.66267224679	381.514735854132	740.035338337899	307.665118472415
ENSGALG00000005550	ST6GAL1	-2.00384208822901	6.859862812843	1.07629132411584e-06	3.35484179359539e-06	4758.55788985814	4935.46127549499	4376.76753970464	2426.36933770329	692.091079318641	839.833313499467
ENSGALG00000005551	DKK3	-1.71964064290714	4.45036521172763	1.09751161649928e-07	3.85903938749469e-07	995.42474081406	799.463148757866	738.271175175622	355.617171934665	177.279480520115	363.148599773626
ENSGALG00000005553	NLGN3	-2.50357238725754	5.49668711803192	9.24348265549153e-07	2.91133484824944e-06	2088.25381187484	2202.60255270024	1516.18698386306	300.397114180835	89.1405297530522	914.967506556079
ENSGALG00000005558	TBL3	1.04615835260286	6.67496057919596	3.58912085385632e-05	9.16313953507148e-05	1485.15254941904	1753.27794444099	1804.03637649734	3272.00375250866	3650.04581752816	4992.87124515691
ENSGALG00000005559	MRPS23	1.20721407088257	5.4174385847783	3.21027806790273e-06	9.3866662289669e-06	650.591274650003	601.232975659945	699.555651256447	1672.34287993333	1285.83806208712	2278.06607105002
ENSGALG00000005571	HCCS	-1.12487362898407	5.61223124789396	7.75263086179517e-05	0.000188286290276487	1941.65157377555	1698.38564329685	1432.01017046163	984.398123920929	834.461477921744	772.506091917102
ENSGALG00000005575	AKAP1	1.12197018387879	7.54575495862146	1.3370990958796e-05	3.60007009919837e-05	3463.7930121883	2997.40410875398	2443.87140803959	8004.6995719952	5776.10601220059	8420.87339291165
ENSGALG00000005580	TMEM56	1.21203149844571	5.51554843895793	1.44530989055805e-05	3.87333705364143e-05	781.610357345646	756.343416244686	547.09594246308	1968.0428583465	1660.61795877034	1804.89028209329
ENSGALG00000005584	GALNT18	1.01490664765519	5.73813076068745	0.000374521646287567	0.000816449801892176	697.913171059199	1033.436186764	939.310929881691	1751.41180936651	2153.58225239937	2131.36008218534
ENSGALG00000005597	CNN3	-2.59215117184214	6.92039217387621	1.4083439254742e-15	1.06371671318703e-14	4195.82727002815	5535.41681646005	5988.9812266278	644.005046603078	734.426768125939	1731.73006677559
ENSGALG00000005598	ZNF598	1.15258581581317	6.55040175154135	8.63554398921476e-06	2.38909511741667e-05	1788.02547006902	1414.22952821696	1197.97296706932	3798.76887962215	3201.34878955956	4124.80386894065
ENSGALG00000005599	Uncharacterised	-1.06407568902707	0.633819846595886	0.0203019391865646	0.0326460498825662	57.1073992286925	54.7866336547371	40.3383146608909	20.7356589295983	26.5044116962849	35.949958822982
ENSGALG00000005601	DNAH12	-1.09422996869038	3.55500375014746	0.0019634416841551	0.0037894538790671	313.517082758564	458.935826528765	432.586128232195	180.561979910654	201.899836946088	260.769211850545
ENSGALG00000005610	SLC44A3	-5.21182453578336	2.39290600858451	9.74344422336065e-17	8.13261804496113e-16	283.853699456987	295.124080570062	188.973575629492	11.4138820114036	0	13.0962056397463
ENSGALG00000005619	F3	-5.58194408712718	4.11721588949673	1.08802056319833e-24	1.68186675171322e-23	913.440035222288	800.59656823657	854.06967618772	16.3155744644462	3.52396742327266	46.3848485132172
ENSGALG00000005621	CAMK2A	-2.38671000160372	1.76627325801661	1.17692318788498e-05	3.19736424435038e-05	166.642677366492	129.658868552863	128.779355457505	10.2597722695296	41.8022777011419	38.4177049356659
ENSGALG00000005626	TPST2	1.83803174886754	4.59920567304493	1.97674149823577e-09	8.43549629700806e-09	209.676061684723	326.902741902674	262.41369432921	988.4320508781	949.09829106257	1335.54630973253
ENSGALG00000005628	COL9A3	-2.31705038318333	1.82541451600063	9.81760946327583e-07	3.07754559941922e-06	142.96691156723	117.987381099591	178.913748560887	37.3793885860533	14.8380466148246	52.8239834844999
ENSGALG00000005630	CRYBB1	-2.6260298070912	1.08797787551452	1.70162350606785e-07	5.85893887875855e-07	100.224243138741	76.6462914561803	92.7696970264344	25.0394746497338	8.34824367295693	16.6300076030989
ENSGALG00000005631	TRPM2	-2.53184409668172	3.58613123198622	5.80059076791433e-10	2.60702254675865e-09	586.437013345675	442.697911807293	513.416985886851	98.5921879326575	117.705215779219	74.884307744544
ENSGALG00000005634	CRYBA4	1.74563396688014	0.417129694936746	0.000912841417176006	0.00186347786917121	18.2622112182457	14.4065409503182	10.9135046997886	52.153842370109	66.0475987678042	42.5709703341162
ENSGALG00000005646	TSC2	-1.15354878455074	6.75211760585021	2.24320655204408e-05	5.88093467083627e-05	4207.08741547507	3168.04671352212	3876.44805431887	1618.55164135879	2019.44014448828	2022.92163914838
ENSGALG00000005648	Uncharacterised	-3.29242784574965	5.51488050068776	1.2184208437325e-28	2.48232191250755e-27	2187.45237641183	1923.20522125105	2164.62626395014	206.325271113806	173.643468397504	374.175171069724
ENSGALG00000005649	Uncharacterised	1.39069409954189	2.15163573265109	0.00108331092445982	0.00218258435228781	43.604032145501	63.5394621057357	74.7587771721066	149.521854349387	140.223665249763	269.563566084778
ENSGALG00000005652	DIDO1	-1.07064491170725	7.23452146187902	0.000621269101994627	0.00130481268404667	5685.7814950589	5425.1031862649	4333.04382183135	1653.69810585717	3228.12553094555	3368.23658156519
ENSGALG00000005656	DENND6A	-1.08527700924926	5.32346787476897	0.000106094129770708	0.000251677060123215	1580.31748411036	1417.60414581632	1117.94757774469	687.55079608668	509.568689386639	1083.5150380136
ENSGALG00000005660	NF1	-1.01521288056431	7.42900176533106	0.000505129680482093	0.00107726884583277	4938.5210876129	6457.2893782407	6050.49885424503	2460.63719431434	3770.61587377695	3343.8307788442
ENSGALG00000005661	Uncharacterised	-4.6767481275255	0.569779559507847	5.36476396630733e-13	3.20364090432842e-12	68.755079608668	59.8486715722562	79.4243276321696	1.03831634961259	5.70694100570178	1.92087212670909
ENSGALG00000005668	WSB1	-2.56116150245064	8.08983579222443	3.02536876844124e-15	2.21810204399316e-14	14731.6070075668	10957.2741067235	9588.79268275833	2727.32124690821	2172.30220012341	1696.79031430579
ENSGALG00000005676	TTC28	-3.436609638599	6.55927469803723	4.10405098515944e-30	9.40104114268906e-29	3150.21964755805	5073.21368420712	4838.34458463397	470.613671043727	307.760832534038	634.395918665916
ENSGALG00000005684	FBXL15	1.07873116219083	4.9358349722645	0.000732524911804089	0.00152232496165115	389.937041721945	654.810281987314	440.315226567314	1197.2172333607	715.399964883075	1810.24168700861
ENSGALG00000005685	Uncharacterised	-4.54632914661263	3.70650321252321	2.7798400944438e-23	3.91806792482552e-22	613.170331649443	714.54754733456	559.882653168047	20.0357848150966	41.5750190077471	26.8041580487331
ENSGALG00000005689	PAX2	-6.11594060240972	1.2552048727088	1.30693365429216e-17	1.16883756283728e-16	67.341903867281	156.551078326791	124.41395357759	0.854981022460803	3.34418221609135	1.03831634961259
ENSGALG00000005694	GARS	1.25171016105828	7.6023478097351	3.37189994967707e-06	9.8332253809514e-06	2792.94807223501	3255.49845194693	2650.44116962849	5975.21757460122	6489.47718507869	11730.0465431194
ENSGALG00000005696	ABHD6	-6.42890832251539	4.42612559276298	1.20995225015432e-54	1.06983977958645e-52	990.561617143468	958.378373655455	1260.31700477771	16.3155744644462	11.4528941256361	14.3572150159958
ENSGALG00000005698	HIF1AN	-1.63715103835033	5.8597373682414	9.37851525243697e-10	4.14485997311135e-09	2237.57173341513	2353.54247075141	2055.33317557872	792.32044120465	800.262237023312	799.259549645833
ENSGALG00000005699	NLK	-1.47085023976015	7.36953840405639	8.48765493085867e-09	3.3815490341838e-08	6031.57967489954	6364.38060955863	5996.96277958578	2817.86691348541	2164.81194887075	2512.31688983863
ENSGALG00000005701	IP6K2	-1.09298421480179	6.58026388590925	4.21525352237019e-05	0.000106246498417324	3742.2407615575	3050.57228814015	3064.94300104772	1541.8997791747	1833.06945103141	1787.37151390281
ENSGALG00000005710	CTDSPL	-3.08071185759288	5.74790069569327	8.16510699968118e-30	1.84173153293829e-28	2232.32035814868	2550.3304517038	2485.79430947599	303.061198401449	292.666306095299	383.604751633921
ENSGALG00000005713	NCKIPSD	-1.90868371928732	6.50690799189137	3.61327028628835e-10	1.65822850543399e-09	4108.37229688495	4325.81964048801	2437.68715250342	1036.99975982181	1143.25561068727	1038.68939800962
ENSGALG00000005718	BHLHE23	-8.48605554704565	6.69600227298182	1.7475070492805e-97	2.10701690860066e-94	5554.42253943502	5503.01018722251	4591.72955252427	23.1924242566086	16.0252637758296	9.18306804025262
ENSGALG00000005725	CSF1R	-5.92147485276861	4.48930097665191	1.11961242991688e-16	9.31582161730714e-16	517.512197940137	1843.01152056235	977.028300176145	15.3669770136727	36.0145655093023	5.12988613476482
ENSGALG00000005739	SCD	4.72649017694284	7.75679236616928	6.29432743830516e-49	3.9193269865841e-47	356.527086366155	430.563460321762	403.905059999298	11859.0234098483	7077.45335085964	18612.9822654894
ENSGALG00000005747	Uncharacterised	3.4097210213808	5.35046617391616	7.49752821715604e-29	1.55617710084727e-27	167.868975571643	167.263690660222	194.514077579896	2600.2204745131	1370.50825501348	2568.09125970995
ENSGALG00000005752	ABCA4	-1.62384984775413	8.15782787491741	8.44335426548074e-07	2.67456908581493e-06	8833.70533828874	12968.9827640645	10836.0830494188	3244.12749131106	5015.13515002024	3244.46852207274
ENSGALG00000005754	Uncharacterised	5.47934665067421	0.105141816509407	7.53948174873725e-14	4.86126137255723e-13	1.16539817603187	1.76198371163633	0	40.063159439574	45.0805158339674	85.5257533873655
ENSGALG00000005757	IRF8	2.28030789418638	5.53040885983762	1.30405956490611e-13	8.19315111764555e-13	386.930600186581	426.433612129418	378.698613082663	1798.02509023507	1381.14725524573	3764.93508369526
ENSGALG00000005767	TRAF7	1.34511898728368	6.88456510230016	2.77623059181072e-07	9.37163307182121e-07	1299.21479095149	1794.21065213056	1954.05660035229	4983.70273274673	4062.0064492613	5612.95041245517
ENSGALG00000005769	WEE1	3.37150517847884	6.25662319885245	2.28475217100968e-34	6.64532193949593e-33	290.943852799948	354.065875217894	373.233941772897	3435.47979861921	3675.66838288879	4931.53053755391
ENSGALG00000005772	BOK	-1.4817188754911	4.564658849134	0.000149455835229183	0.000345939396622103	781.852211258281	1096.87406129588	752.981873669963	440.905589871458	377.046630905214	203.995115181572
ENSGALG00000005774	NKAIN4	-5.92013913996512	3.55275476808405	3.70586966735361e-16	2.95023705871014e-15	577.222074076081	614.430314598096	548.042835397375	5.01627332413703	22.842959691477	1.14138820114036
ENSGALG00000005776	Uncharacterised	1.52243233458603	2.74102015027537	0.000217142643978279	0.000490491349965145	99.300773499211	71.0722686882363	87.3080375983085	240.249667311486	181.421885222956	461.01245922799
ENSGALG00000005778	Uncharacterised	-1.90759388571412	4.25585427610509	1.8569467048666e-08	7.09246745817071e-08	944.262987590493	742.170028618109	591.055652045351	268.455837021453	200.448486277482	213.200029107996
ENSGALG00000005781	ARFGAP1	-1.55022019938361	6.84779124034055	2.45059038287485e-06	7.2940260879868e-06	3772.40712661338	4947.71717474317	4272.73595423057	993.440997081875	2094.19310030452	1822.68274731385
ENSGALG00000005782	GCLM	1.13830874579193	7.69033693567907	1.28281197817653e-05	3.46374903635085e-05	3772.39389581518	2657.07143714758	3335.29148833133	8054.69820532636	5932.26195400319	11070.8336329201
ENSGALG00000005784	CCDC117	-1.03078990336907	3.45611834255514	0.00315894159213253	0.00589600933527353	370.728320454854	377.607262612684	360.801991478459	158.012609710316	182.743677531816	286.488438486229
ENSGALG00000005797	COL20A1	-1.69799594042125	1.74239656322424	0.000275069675683219	0.000612842114662614	142.178577475889	94.2661285725436	143.572150159958	48.0757913274888	48.4198133031502	32.0721575202621
ENSGALG00000005801	CHRNA4	-5.3772531463121	5.39655859136661	8.70891840908475e-14	5.58271555629246e-13	1984.22254410966	2624.05147442168	1613.53258643563	27.2837617494714	110.292551897444	11.7046377563197
ENSGALG00000005802	FLT4	1.3809093167951	1.44322412070069	0.0312950051290694	0.0483252594046859	51.362469051316	16.3274130770273	43.6540187991543	53.8638044150306	182.257930776979	67.4905627248184
ENSGALG00000005806	KIF24	2.11027363900676	2.67470699797933	8.46446460966315e-05	0.000204228113731058	34.2277990591234	87.9014687592368	57.1045106255618	125.981835381998	361.139177710048	384.606330619911
ENSGALG00000005807	IPO7	2.57479452177992	9.44096278412968	8.9812630518505e-21	1.05228349696725e-19	6030.03030671824	4819.59808058076	4276.80523365583	36631.155318883	23770.6265965221	44479.5168165475
ENSGALG00000005808	KREMEN1	3.58217079018682	2.58765960105046	1.91798314922321e-08	7.31613762098e-08	16.3155744644462	21.143804539636	30.9232323421448	171.270006604179	112.701289584919	762.604634370676
ENSGALG00000005814	Uncharacterised	-5.72840608113967	2.40346010608535	3.53616944440684e-24	5.24610909856464e-23	281.407766562881	303.395430654122	194.080692098602	7.52440998620554	5.19158174806296	3.42416460342107
ENSGALG00000005820	RNF130	1.85119323653749	6.41657091024732	6.7303829163239e-10	3.00859685268634e-09	987.092255098997	803.464572506166	1012.73585920524	4075.42489399067	2012.76154954992	6014.12346389211
ENSGALG00000005821	FAM219A	-2.01298955575186	4.50654585334866	1.447398838588e-07	5.02798606500591e-07	814.917466631802	1140.84639319413	795.253714875544	190.339955743418	336.163725119784	213.267866213833
ENSGALG00000005822	KCNQ2	-3.48567606078218	3.81368615168703	5.33382081416983e-11	2.66349644044934e-10	635.503861975563	844.913677623109	466.925683583627	40.8628427378342	104.164214542892	37.5670965283062
ENSGALG00000005823	HDLBP	1.27999459577434	9.49445668219401	2.26807877224803e-06	6.78734854610235e-06	11741.9930807744	11153.5835879774	8963.50923165385	29369.7812847585	29017.2491850176	27958.2765443895
ENSGALG00000005826	DLEC1	-3.75487256822096	0.979083377561689	9.74837600927013e-06	2.67964167898341e-05	82.8132344469075	94.9784993365876	92.1452667110203	0.834824367295693	17.8178652890345	1.16539817603187
ENSGALG00000005839	ARID3C	-7.33887943616905	0.450648348220176	6.74347917322209e-19	6.68451153022755e-18	71.0892887379443	58.1454624839989	68.4728716147492	1.00157898598935	0	0
ENSGALG00000005842	GDPD2	-4.23009059672301	0.997297469725135	1.90775450602876e-11	9.89540399431346e-11	68.4832920684214	72.9931408149454	137.510159217336	1.70996204492161	7.52440998620554	7.26821444728814
ENSGALG00000005845	SLC7A5	1.72273428414934	8.60837751353269	3.88961577919737e-10	1.77766967882477e-09	4497.98642652174	5530.02583452503	3713.04582092867	19866.9439554951	11530.2740689064	21251.4419377065
ENSGALG00000005846	MPDZ	-1.59679382940431	7.47642623506067	1.18331459135395e-06	3.67032306480996e-06	7149.27080199199	6150.98593823466	6954.90675115313	1725.95469870321	3290.50458148084	2278.37958292303
ENSGALG00000005849	PPDPF	2.19993353160786	5.43301993826687	2.54587208748183e-10	1.18643364357946e-09	277.996514309466	530.972385613228	357.777240041785	1789.29445916669	2361.20966955377	1725.72059285965
ENSGALG00000005850	FNBP1L	-2.35058322069682	8.09866058258246	1.2603315771049e-16	1.04604366127298e-15	13118.0887610055	11601.0696763906	9982.77244250713	3083.06507769027	1576.58500541772	3287.3311184178
ENSGALG00000005852	SRMS	6.11740768808187	2.04254101560014	2.87556699270028e-17	2.50912138316999e-16	0.854981022460803	3.34418221609135	4.15326539845036	240.832910440615	286.209946879654	116.774500287738
ENSGALG00000005854	CLUH	1.94897085732396	7.72432943248057	8.91028718431146e-11	4.35917148378911e-10	2194.59640476513	2649.79894110866	1741.59634275266	6470.15654258274	8853.72351314656	14146.3653649336
ENSGALG00000005855	CA5B	-1.95193524736279	1.44330588324254	2.48454200540762e-05	6.48033050495993e-05	128.288630081048	96.7280486106456	95.1471204283618	44.176046203064	17.026842761819	34.2277990591234
ENSGALG00000005857	ALOX5	1.65713688296695	4.36305041541775	1.32735228069137e-07	4.62915416744929e-07	213.439593613247	267.961661675918	265.198164204862	1021.70232184066	589.412115586101	1130.72650472811
ENSGALG00000005867	2023-03-08	-2.3867593372076	6.4752474145078	3.15218032157204e-20	3.48104642839383e-19	4405.20510540048	3308.12441859721	3589.30375399895	782.233188057683	662.015723265484	1048.87833668116
ENSGALG00000005869	COPG1	-1.46462164081488	7.05980928731004	8.6668560490863e-09	3.44569879433548e-08	5526.31815074315	4180.30635585719	5113.37734800466	1924.03323208554	1840.787729887	2342.45535666507
ENSGALG00000005882	LRCH2	-2.34605222703538	6.97105228613033	4.11065433070575e-17	3.55176601877201e-16	6216.67410192618	5297.35125689768	4356.11354854893	1183.10625519189	1156.07499062362	1153.21833926598
ENSGALG00000005888	PGP	1.11911641680981	7.09157465494586	3.4023756174551e-05	8.70480474813022e-05	2588.71630749955	2112.33008145154	1806.55993082788	5819.31480339866	4928.4688864388	5102.70482889881
ENSGALG00000005889	CCDC18	-1.05579140000975	4.19352203145308	0.00184498577317603	0.00357559994074874	567.680569761071	680.642454041117	615.33023694483	237.867801070904	386.54040427681	377.595277717985
ENSGALG00000005891	DGCR2	-1.60810920034734	6.62317236843688	3.82501306922554e-07	1.2724140541043e-06	4291.19004795686	3635.37930750334	3306.56016616032	1171.220842363	1716.6478545151	1118.90801380804
ENSGALG00000005893	ZFAND4	-1.22794568955015	5.50824539135271	2.13306045986878e-06	6.41078198033983e-06	1648.84636318479	1629.90235122843	1544.38118987411	868.71497410317	578.822152205964	923.830337195236
ENSGALG00000005900	E4F1	-1.56163718211967	5.92659919839059	1.11404757870668e-08	4.37148314685999e-08	2457.75588612428	2495.91852484165	1920.28737644696	676.360853204476	819.231599844334	1179.05401177799
ENSGALG00000005901	PCMTD2	-1.59065908619662	6.56509874731465	1.26263630927669e-07	4.41041489858749e-07	4237.7138749279	3469.51298914594	3050.73022662934	1180.56568950952	1564.84322376343	1175.57374154596
ENSGALG00000005903	NRIP3	-4.96113441524174	3.6810643077399	1.59429358916029e-29	3.54189545611941e-28	619.006260261622	612.82139109874	641.679504060581	15.979434815965	28.8130819006363	21.8270093995771
ENSGALG00000005905	ZDHHC4	-4.95877361005238	2.11666214482235	8.89711415303113e-17	7.48110007012577e-16	159.459525903088	205.418614844248	264.416852301189	6.67859493836554	1.18785768593563	16.3155744644462
ENSGALG00000005922	RPL5	1.52910689269271	10.8391466005927	1.64335772476812e-08	6.32252808062361e-08	27224.5928737933	23660.3003860264	20503.2864607822	95800.7223707087	54068.6483769988	87167.9771902167
ENSGALG00000005924	Uncharacterised	-4.99789051280674	5.17349794520312	9.0521612226432e-55	8.1672662786338e-53	1745.87124786496	1772.41657452842	1772.40600878869	69.6246802695617	52.8239834844999	65.4810281987314
ENSGALG00000005929	Uncharacterised	-1.70995413009298	4.82254897068026	1.62808230800362e-08	6.26981871401046e-08	1320.53406867442	1055.04658171663	899.585016128574	305.265006786102	373.233941772897	458.128002220118
ENSGALG00000005930	PLS3	2.62439739964965	6.02340227445397	4.31146052025568e-10	1.96167756021101e-09	516.043225757458	449.7069512493	406.264454798972	3079.79102628033	1031.96209411019	6404.10894381494
ENSGALG00000005931	RUVBL1	1.01743499451776	6.85398608898009	8.66741103966759e-05	0.000208934701234299	2229.40671074898	1532.92582912361	2024.36731725541	4217.64911000116	3376.86456571108	6033.12918686708
ENSGALG00000005932	MYT1	-1.42204835619605	8.38914523632124	2.98555308972901e-07	1.00373613761916e-06	13799.4924326821	13282.9405121908	9888.49463061748	5550.85896637721	5027.52773140151	4816.38247575791
ENSGALG00000005938	Uncharacterised	1.95101431229981	0.962530041300851	3.24880228803583e-05	8.34247139326606e-05	14.5364288945763	18.2622112182457	24.9713376472182	94.9474908881605	70.1084438417859	90.2929198344665
ENSGALG00000005944	ZNF639	-1.59057288802614	5.82311440371963	1.02300366118345e-06	3.19776044267643e-06	1902.00363540196	1999.79728935385	2523.60931272133	644.452598510899	1005.13378285053	675.435007744035
ENSGALG00000005948	RPL27A	1.37021334983626	9.72927754135672	8.81881230630492e-06	2.43624052527645e-05	12654.9996690783	13001.5529991898	10195.0288125085	49270.1083176655	18771.9633291494	39810.8171914595
ENSGALG00000005953	RPAP2	-1.80235412344407	4.28020842334945	7.13796004652234e-07	2.28177305608642e-06	875.214030199937	640.481079179806	763.141198157931	188.296849365998	304.710894062928	223.317244955899
ENSGALG00000005958	Uncharacterised	2.89023814943025	3.35724797562604	1.39369078624957e-05	3.74407958234314e-05	38.4019208956019	62.9564573545885	80.4124741461993	390.279392127447	87.2476912510514	1261.98952234658
ENSGALG00000005961	DGUOK	4.47495761256405	3.92756112176607	1.41769553818459e-24	2.16373946178852e-23	30.8174814307896	34.5756982807636	32.7405140993657	592.501848565337	534.233109020593	1512.82692138555
ENSGALG00000005968	MMP11	1.63109252827401	0.885774102374119	0.00049201158025718	0.0010513210228695	20.9771671685737	18.5008289721815	25.4012265667618	91.1436877250309	45.0805158339674	99.7800456185931
ENSGALG00000005975	ZNF488	-1.25196994505068	2.05128585781987	0.0236962072623012	0.0375711652026181	178.912987122409	178.281059506104	78.4734905257951	110.470764792014	55.93911244953	34.3586823769084
ENSGALG00000005977	BTBD8	-2.1607595398418	7.86426011276259	2.74896373623103e-13	1.68326435981681e-12	11077.1435854183	9705.30037423681	8049.37654946507	2420.85396393682	2594.17633984695	2103.80855169378
ENSGALG00000005982	KLHL9	-2.33144914649185	7.56744933746122	4.32750257259527e-16	3.42456244751379e-15	9410.60224240771	7478.79028838248	7066.78826915804	1459.87709601489	1926.40318498069	1941.70605022323
ENSGALG00000005986	TUB	-1.55856595199528	6.50071496169436	2.73071278513661e-10	1.27034176321525e-09	3635.32142063203	3313.50441857318	3280.59951275644	1436.36811773415	1045.89298808257	1491.02227804368
ENSGALG00000005995	SLC13A5	-4.75987392170541	1.59172540449865	4.6192041077504e-19	4.63072593205544e-18	121.226605333312	141.211023547312	170.066841969913	4.80218031677272	5.45675234989428	7.69482920214723
ENSGALG00000006002	WHAMM	-1.28875283141286	4.26924479646286	4.54932136436043e-05	0.000114146139340735	869.806324573149	601.906639812406	593.592343356215	324.993017428741	284.205662083949	349.598727061054
ENSGALG00000006007	SAMD10	3.06199063428468	6.72500066690811	2.3057697335352e-24	3.46728162991807e-23	583.952038340729	408.826275917168	717.4765975823	5856.46286005117	3665.9844538243	7152.71098024143
ENSGALG00000006008	HOMER2	-3.18069224734352	4.5638088374025	1.51770261260984e-19	1.56892359711959e-18	1080.10432966491	983.550564241542	1154.56209996994	179.36651057628	71.0892887379443	163.864485182179
ENSGALG00000006009	Uncharacterised	-2.09565274186167	8.53721674785191	3.65412351853018e-10	1.67465930291174e-09	11639.7116397814	15133.2605733674	18782.1044481422	5785.69679158047	3049.38450115068	3116.89694225961
ENSGALG00000006016	PASK	2.67129164429106	4.03240927703835	6.53298417694782e-14	4.24948352814413e-13	99.1563196129457	82.6476123622736	152.045783799761	828.598103158663	674.839761556714	929.905772574497
ENSGALG00000006017	DOCK11	-2.30704850816187	3.84295166012333	1.33128363936665e-11	7.0038932601824e-11	700.157890185463	578.415749088794	522.393404723551	149.652154170088	99.6783695628087	171.208230171053
ENSGALG00000006019	EPHX4	-1.86748261308103	0.749231603415142	0.000265718179205107	0.000593402965279902	67.2305244348181	74.2118319585623	51.2988613476482	17.5569566344796	8.30653079690073	37.6658106376318
ENSGALG00000006020	BTBD1	-1.22198551395401	5.64816177736843	4.47721735625398e-06	1.28447617988312e-05	1772.57587637097	1442.57496715853	2091.02750047949	796.842312933469	766.653773038942	1035.20140056375
ENSGALG00000006034	PITPNM3	-1.90927672416768	4.30235273946886	2.67885416313362e-08	1.00525888736913e-07	990.946226740802	698.519495350476	662.98412434011	248.157607557409	239.691522239475	207.454189684582
ENSGALG00000006035	PDE3B	2.00426386839641	5.11312117696573	1.8452766703354e-10	8.74692797664702e-10	367.641839658145	334.418221609135	340.56776267293	1626.47818662501	849.025480005417	2534.11579129091
ENSGALG00000006037	MCM2	1.13006527715066	6.04949535359558	0.000142224758588359	0.000330412852190822	792.248977917576	945.021183778724	1401.67206940405	2724.70093556252	1640.40683553342	3737.29350877921
ENSGALG00000006040	UCKL1	3.17822770241285	6.58011106676483	4.20422890115747e-29	9.02276503495978e-28	572.9589967389	396.711194421813	469.857601360835	5570.56721567155	4175.19803977142	5002.91145401382
ENSGALG00000006045	SH3GL3	-4.98719380437346	1.78328050431166	4.75663132252641e-18	4.45845945093059e-17	121.226605333312	181.705361182203	195.177382395001	7.68348850683635	1.09135046997886	9.40479124706884
ENSGALG00000006047	TPRA1	-1.64777262614264	6.00523425393283	4.64603089142158e-09	1.89542626000998e-08	2902.99225014376	2193.88130363442	2269.02763361798	876.338999073027	909.686396308864	829.816758738326
ENSGALG00000006048	Uncharacterised	1.01594553711051	3.64824619735885	0.00195522364602274	0.00377537490324601	228.611039100856	193.304744295945	202.027496885558	477.518789746124	404.39316708306	561.191812156171
ENSGALG00000006050	CYP2R1	-1.82845519867403	0.329236925560647	0.000272875815737577	0.000608158619413121	48.5936508233704	49.0773703134782	43.410867099376	21.3814383468414	11.6539817603187	11.4528941256361
ENSGALG00000006051	CDC7	5.75643754361562	5.47514724564742	7.36122214216506e-42	3.26528057764332e-40	57.1045106255618	32.5966986652721	32.0276334972214	2424.82272508022	1253.07137531084	4297.66910771512
ENSGALG00000006053	SLC2A11	1.99340089676444	3.37625012849245	5.74151728579485e-05	0.00014199094492168	56.0150521195301	92.4101551155206	164.359900964211	402.422710545554	602.425459428329	341.137427961861
ENSGALG00000006054	CALCA	2.01019336945509	2.51917545126486	9.13443777726428e-07	2.87835705012725e-06	55.0868442294143	57.6028813434028	57.0171689249104	320.484498408765	169.150436317088	302.605916490988
ENSGALG00000006057	CLK4	-1.83762360495172	6.06075078319819	1.43224835859071e-11	7.51420489714738e-11	3006.74011594003	2012.76154954992	2869.86416922049	738.862443604208	712.722411356895	1092.25274237076
ENSGALG00000006062	ZBTB46	-1.7548284929825	5.93545432315705	1.24236527837245e-10	5.96578229075082e-10	2440.34378061074	2405.98875823941	2296.05000140425	829.307400399182	496.720498540937	1172.41553601847
ENSGALG00000006064	TEKT1	-2.27655394931599	3.61317286253507	3.08903295279553e-09	1.29160920721712e-08	368.254595731993	557.722583313683	601.9489705796	93.5003291371176	124.725057023241	137.516984771761
ENSGALG00000006068	TNRC6A	-1.71255099285018	7.00928663991928	5.6348918251023e-08	2.03694658698097e-07	5365.95628596184	5798.34504699767	3779.87110029921	1034.18835032625	1751.63968179644	2448.27769144606
ENSGALG00000006069	SMTNL2	-3.46898384881999	4.50402567350945	7.60786972317688e-23	1.03809851994336e-21	1042.08742764115	972.921732178153	1127.36503548816	87.2080642910019	123.73474199538	103.831634961259
ENSGALG00000006074	SOX6	-3.45267802858104	0.647119116989503	9.88711187209968e-10	4.3507884790862e-09	73.0488448729828	72.9931408149454	63.2983272587737	11.1147532919904	6.6883644321827	3.11494904883777
ENSGALG00000006076	RASGEF1C	-2.49125868868238	3.45500406223683	9.13905684553647e-06	2.51893829888508e-05	426.635530207941	485.742466887269	490.085317017143	194.035994193861	30.7339540273454	60.0242758488371
ENSGALG00000006080	GPC4	1.28156810478811	5.46283240931316	1.85339963776067e-05	4.89966900450862e-05	433.273846626465	764.980349742547	743.524036308336	1613.09608800306	1739.43181924564	1979.12007631496
ENSGALG00000006083	Uncharacterised	-2.32576033245538	3.23151543315741	4.45158331398611e-10	2.02265671440212e-09	343.11281495853	421.689478507149	413.716352491315	96.0281122841799	65.1596681495194	110.173688458829
ENSGALG00000006087	GPC3	-5.24312975261068	-0.559142201855132	2.11620871850964e-11	1.09466755981253e-10	28.7144300319916	37.058422481606	25.8795553861665	2.37571537187126	0	0
ENSGALG00000006092	Uncharacterised	-1.5843001556813	5.40460208898827	6.40899612369655e-08	2.30734298557512e-07	1918.39016278605	1670.01558625368	1215.76876102907	612.942641067513	593.936338691685	584.377057106985
ENSGALG00000006096	RPS13	1.47057973794841	8.66229745493916	1.0786102343537e-08	4.24121184056717e-08	4812.27820895546	5196.77332981102	6247.95901304231	18974.3748676324	13108.210494916	19631.2192567225
ENSGALG00000006104	Uncharacterised	-2.74340932005621	0.232419531757741	8.17042359528262e-05	0.000197781215813531	55.93911244953	44.9305846467264	46.3848485132172	3.00473695796805	0.834824367295693	23.7571537187126
ENSGALG00000006109	MAPK8	-1.1402084895776	7.08864425040707	5.68722283845186e-06	1.60693729242409e-05	4887.35505762647	4985.58366258108	4298.91181957494	2797.13125455581	1837.35421726827	2736.37709831675
ENSGALG00000006110	PLK1	4.51935246669798	6.13516551294565	5.05737228621551e-42	2.2892808406852e-40	103.831634961259	205.449876205264	134.461048869636	4124.2134260501	2753.03889232379	4947.71758870716
ENSGALG00000006112	SCN5A	-2.49517913646386	3.71278088027019	1.15053616465299e-09	5.03283679148834e-09	489.8314718349	680.311111527186	509.80370386858	96.0048022390047	58.205026610846	206.275477157642
ENSGALG00000006121	PIK3C2A	-2.7868386939097	6.60850707856888	1.22087009301649e-25	2.03166876332217e-24	4388.91911660534	3609.78056418658	4895.16152374074	728.373860019921	604.360413091261	796.273232810229
ENSGALG00000006122	EARS2	1.35462383215895	3.8039087550187	0.000214352851243919	0.000484485662244051	144.424615542155	247.074398674612	199.28308810145	476.616593997627	616.255844532743	594.937917677674
ENSGALG00000006127	FAM122A	-1.13351346548797	6.42308467682141	0.000230854242443544	0.000519392674729215	3821.22799656504	2838.47484629382	2261.53921100403	1708.13935237544	1560.46815770668	1214.00677731743
ENSGALG00000006130	STMN3	-5.58579901683443	5.57186823659074	1.67062759803029e-41	7.19400449112848e-40	2023.67856539494	2832.92551523036	2190.75466051172	27.2837617494714	71.8184058867075	64.3755076597585
ENSGALG00000006138	HELZ2	-1.21732824285828	4.57477224800636	0.000113879191775117	0.000268894377873132	637.066712165403	978.094001335061	900.555290699741	333.271313984027	417.987230001902	470.239562353442
ENSGALG00000006147	NUCB2	1.10032970241819	7.41017171760672	2.88933492939221e-05	7.46420903165736e-05	3196.56552656807	2369.15241323889	2621.83885741562	6285.96718055463	6520.75079311486	6912.25834796266
ENSGALG00000006157	INTS6L	-1.80094638125534	6.03130531781408	9.62624251261443e-12	5.13774062152133e-11	2877.43965507484	2168.66463105456	2641.06813734883	713.05417273231	740.736360864234	1080.88731994671
ENSGALG00000006158	ACVR2B	-1.17588528408844	3.44737046290662	0.0148810701182875	0.0245849069480377	342.778677149364	479.702153521017	316.164531715879	143.104973439827	281.568421254545	106.01764678514
ENSGALG00000006165	Uncharacterised	-4.47801349469557	0.0963967746531296	3.87320051793514e-11	1.96219474672933e-10	35.9092029433537	61.0313254436672	49.8391847814044	0	3.84174425341818	3.27405140993657
ENSGALG00000006167	LRRC8B	1.70796971924041	6.71102541153108	2.43551582114564e-11	1.25396919005647e-10	1345.1606068833	1193.88215129931	1175.43270915234	5326.35386373537	3306.23462540243	5348.50155667208
ENSGALG00000006172	ABCC8	-1.65416415484022	3.95647430618988	1.8061032050164e-05	4.78226129130217e-05	532.586966446567	617.575290928533	626.195454928432	278.438958105039	202.862321252853	138.979349254469
ENSGALG00000006173	XYLB	1.56256174013123	3.36846866441769	4.54501948056958e-05	0.00011405977932033	148.423663917125	88.9180263359235	154.668427494225	378.985467608596	428.020575427634	505.18936932449
ENSGALG00000006175	DPEP1	3.03502685177719	0.728019315474213	1.42910107268178e-08	5.53567976839323e-08	4.36540187991543	8.54981022460803	12.5406833103426	72.6821444728814	57.0694100570178	118.133635792609
ENSGALG00000006179	RPL13	1.43890953745893	9.76503183856437	5.2160993874234e-07	1.70271046456797e-06	8500.07514775019	12479.5242059937	14499.0543190859	43083.2409299581	25222.2007116814	42851.6488457355
ENSGALG00000006186	RAD21L1	-2.88274327418567	2.89874121075877	9.63370561387419e-09	3.8072657198097e-08	344.72102807138	373.233941772897	269.882533802627	73.1204814885834	15.3896584042945	71.0638720919412
ENSGALG00000006192	USH1C	-2.03828354136374	1.35126549605459	0.000161089712603373	0.000371054681878871	87.2185733674577	127.83547852772	88.3601178286181	40.3799673892177	27.3593927187457	12.5406833103426
ENSGALG00000006194	SLC52A3	2.58288983907172	5.37940812600655	5.34965643977429e-18	5.00370192952937e-17	224.353692861615	328.920800714503	345.666586607269	2235.23370162913	1367.29936022979	2685.90360914629
ENSGALG00000006198	LSS	2.67090168085635	7.28364692982608	1.40127239340412e-20	1.60354406848307e-19	1115.39836709356	1237.65286294585	847.514165297074	8750.1703516719	4906.73545236183	10179.8483348037
ENSGALG00000006202	SCNN1B	-5.41111806176469	3.62873818138134	5.07428134167181e-17	4.33914851286868e-16	1151.89040474489	300.473695796805	371.496843446583	7.12714611561379	19.8117689925419	21.143804539636
ENSGALG00000006207	HM13	1.73680910865937	7.55620694848201	8.76652360715634e-10	3.88215033728596e-09	1627.78069368247	2478.46112652525	2465.39851446317	9027.13855946936	7567.42415883339	8013.73712352511
ENSGALG00000006217	S100B	2.56416817227536	0.648498780904437	1.8719068352844e-06	5.66053359698519e-06	5.85231887815987	11.4214798457385	14.8380466148246	49.9426752944363	64.3896777287525	108.582589852522
ENSGALG00000006221	KIF1A	-2.55332795076003	8.26625874374654	1.14555570785451e-10	5.51288292934485e-10	13011.6706353959	12525.0612141668	14282.1157374506	3098.88538265105	828.980596724623	4353.49841895409
ENSGALG00000006231	SERGEF	1.55321774031284	3.05795878016556	7.11599211757215e-05	0.000173683112726094	131.689993891602	104.838030842362	80.6212843205918	283.446853034986	330.590449449094	451.38592065554
ENSGALG00000006237	PKN2	-1.94245452494309	6.32251117605444	1.06092699532856e-12	6.16881838625284e-12	3480.09262527695	2741.08452481387	3386.46050834439	717.329077844614	916.30592720903	1223.13665984363
ENSGALG00000006241	Uncharacterised	7.87781319352882	5.18184743143546	6.57961418076137e-40	2.52212204853867e-38	2.07663269922518	15.979434815965	4.80218031677272	1048.78780164968	1768.10075444894	3654.35511663382
ENSGALG00000006242	PABPN1L	3.72929791902773	2.03473949043185	7.07518779341174e-12	3.82233057857515e-11	15.278906579704	11.9697343144512	15.0488199724111	112.13816575816	268.226227267984	248.752940408827
ENSGALG00000006246	Uncharacterised	1.09343135823505	4.86557268880292	0.000138147830701717	0.000321356480773619	462.076639828961	508.113604749897	434.328984918355	1377.18824038052	806.271083721427	1259.7499702492
ENSGALG00000006258	SPOCK1	-1.36609434848396	4.4611890814998	0.000177538738681259	0.000406262300056856	1035.69159600993	815.651895427606	545.937746776913	467.242357325666	289.91260308965	282.368202626236
ENSGALG00000006267	TPX2	4.74462175459988	7.77030962945194	7.33474554645136e-59	8.92483763142976e-57	447.453692691331	365.931877613224	374.548408202231	10381.0868634267	10053.3472756443	16455.1510734534
ENSGALG00000006270	SCNN1G	-2.6013127870579	3.61551003128286	1.1355426075815e-10	5.47065078254754e-10	491.743264437527	655.901632457293	439.460245544853	73.5720087540097	64.3756136759806	174.632394774475
ENSGALG00000006272	Uncharacterised	-4.1617255303267	4.00158343834338	2.28894200233103e-28	4.59277424764242e-27	688.065490960796	852.457723031937	748.750659948074	36.4965704074727	50.2021216190274	58.1387095273346
ENSGALG00000006273	MYLK2	6.19051539579725	2.32906609981604	1.31593371966611e-11	6.93138559330089e-11	0	8.01263188791481	1.66964873459139	313.594429087007	50.1121215693706	553.262885453807
ENSGALG00000006286	USP31	-1.37981145467617	6.43476171629704	6.57011713793864e-06	1.84071532742882e-05	2825.34088160885	3365.1103195184	3264.14591533929	794.7527976655	1253.18985866209	2200.27175634818
ENSGALG00000006300	LDHA	1.73112586100623	10.7812600896635	1.40468484538791e-08	5.44905969709851e-08	26195.6831843761	17984.8538853686	17515.4724873968	104555.740425854	47377.9183786429	84578.5484727204
ENSGALG00000006301	KDM8	-1.24525173236523	2.9534327388468	0.000837718349947219	0.00172231568366919	304.091567599522	272.703173191459	241.391768494177	127.006132833809	123.19421527669	139.415669338381
ENSGALG00000006306	UROC1	-2.51456363733055	0.302890104493678	1.78005517121406e-06	5.3963135396142e-06	54.7187854374914	43.4743688091876	52.9541338302421	7.98971740798249	12.4856688236091	8.73080375983085
ENSGALG00000006307	NSMCE1	-1.84310049441679	3.9438163960842	1.0908703157234e-06	3.39549706581541e-06	523.364516818297	599.108533726465	691.681249891056	183.443288100718	222.635495875687	146.201754840797
ENSGALG00000006312	TSG101	-1.05014559353654	6.66032353148886	3.76039094635025e-05	9.54930092985586e-05	3870.04034077829	3625.55372563516	2827.98385717631	1996.75728837849	1626.56427324671	2034.4669830996
ENSGALG00000006325	Uncharacterised	-4.57174123874468	0.624505385823412	3.76980983128034e-14	2.50119998960836e-13	64.1010551033184	84.317261096865	67.707888098331	1.16539817603187	4.40495927909082	4.4176046203064
ENSGALG00000006326	MIF	2.82156236929571	6.59794472636846	6.93515055585858e-19	6.86424640465316e-18	575.393001794909	587.926864775749	651.997830857936	6935.90102817816	3532.32187155261	3995.29806613538
ENSGALG00000006327	FBXL21	-1.15004000450467	5.97502141670543	1.44225167942631e-05	3.86670386582397e-05	2523.08705110901	1687.9803957476	2346.85245453777	1071.68951500861	961.717671124638	1349.40633122288
ENSGALG00000006328	CHCHD4	1.08518369486952	4.97332300348809	9.50621926612971e-05	0.00022745049414571	563.13684250909	448.010055769461	508.315696845885	1129.6881883785	1165.3573533643	1349.41266901313
ENSGALG00000006332	RBM17	-1.01778414902851	6.314762211363	0.000211550129459102	0.000478721953082421	2187.23984231472	2875.80345765017	2996.23871057795	1123.26461616816	1513.02958245494	1891.98270453388
ENSGALG00000006334	LAP3	2.83708600937765	6.08148936631936	5.07063686209252e-23	7.02002679560889e-22	458.513066771154	485.971039405292	312.752108815448	3863.19524045795	2684.23168245146	3705.78536642558
ENSGALG00000006341	SLC25A48	-3.19801441312688	-0.217074077752685	1.42235397355928e-06	4.36985887220679e-06	34.2778677149364	39.4560212852785	35.383034235351	2.88130819006363	8.73080375983085	0.854981022460803
ENSGALG00000006342	UEVLD	-1.27031706394927	3.97610218832807	0.000616837926620923	0.0012967382185407	478.354362460432	592.740985281881	606.007051536575	194.699200135814	325.798340747597	242.382114609423
ENSGALG00000006344	GSTT1	4.04518882619854	1.40160986767509	1.38756168061369e-11	7.28552279096573e-11	6.84832920684214	3.84174425341818	10.9135046997886	117.13240007713	66.883644321827	257.502454703923
ENSGALG00000006346	CXCL14	-1.95538508366908	4.02312283907944	0.00017115473237959	0.00039253418909744	625.283451104474	734.096049908221	590.85687524816	308.347149536358	174.495382502103	58.0915811873823
ENSGALG00000006350	DDTL	2.15374121467157	7.36248954266955	3.98451655959391e-15	2.88779470655159e-14	1607.08408474795	1154.98032297761	1805.69588855024	8320.11663661354	5729.39963275034	9429.21431095705
ENSGALG00000006357	XPC	-1.97471420662379	4.78760726796161	7.60012496472064e-10	3.38256568480167e-09	1158.28589240558	1253.96169000571	914.829694033059	231.584618464326	353.027558868281	365.244224364914
ENSGALG00000006361	NEU4	-9.30038011690022	0.59016319287591	1.80782317525641e-19	1.85581724252521e-18	50.877501131017	70.7660684707021	97.9644784621635	0	0	0
ENSGALG00000006363	CABIN1	-2.4565588275265	7.24506514393618	1.53646968405245e-20	1.74920149524358e-19	6713.75351659501	6887.13640568091	5823.1238521186	1380.55834452325	1232.88263438848	1374.45889081355
ENSGALG00000006368	PTPN5	-5.74069146031867	2.36171145297926	3.29383440666863e-23	4.61798369298584e-22	328.719801928423	226.662910951672	201.899836946088	2.56494306738241	3.34418221609135	10.3831634961259
ENSGALG00000006375	TM4SF19	-2.56758501507252	0.27141856824194	6.30412304236456e-05	0.000154951045053523	58.2699088015937	51.9785194932717	38.654040427681	1.00157898598935	7.51341930566124	21.3814383468414
ENSGALG00000006378	LIPA	2.05320245609025	5.01646118064342	1.19986600037761e-12	6.93412756558093e-12	392.637541192283	274.6847141194	281.568421254545	1346.59511037577	1229.82300996759	1975.91601331276
ENSGALG00000006379	SHH	-6.49327703215092	0.167120728143201	4.88067041977637e-17	4.18708484977322e-16	57.1073992286925	57.0694100570178	46.1009310410181	0	0	1.67209110804568
ENSGALG00000006382	PTPRJ	-5.85490875233751	2.78060617279951	2.22821262523753e-27	4.20979829751073e-26	308.885015899406	369.423740325982	336.800072873212	2.64297556745449	8.8352092406128	8.01263188791481
ENSGALG00000006385	UBXN7	-1.61133814244515	5.3585325257115	8.00550980213372e-09	3.20099718135965e-08	1694.96147869343	1487.71546213619	1490.78474199112	436.89530247747	559.314475641279	752.779353469129
ENSGALG00000006390	CRKL	-1.02969072148581	5.0630821868641	0.000469785944007139	0.00100642399860551	922.15824608719	1198.21706745293	1269.22367966808	558.01335280899	666.815137157081	626.701089463769
ENSGALG00000006393	Uncharacterised	5.69812487243312	2.61447879265197	1.95299205244833e-16	1.59204263009356e-15	6.84832920684214	5.76261638012727	4.36540187991543	424.070587140558	400.465820376939	129.789543701574
ENSGALG00000006401	OSBPL5	-6.54050469457384	5.06382393498476	8.34855271654894e-59	9.97539231347645e-57	2193.6144446575	1529.56104918238	1281.65783431701	23.8812760410896	18.2622112182457	18.2482852037363
ENSGALG00000006402	NRROS	-1.78957981081476	0.62097047202372	0.00064174618873714	0.00134335222557145	69.8464300786468	73.5283679316291	30.0976399448222	21.8046433418644	17.1208230171053	17.2878491403818
ENSGALG00000006405	CEP19	-1.71981330389282	3.0148075084739	1.35421665404446e-05	3.64319989504901e-05	296.467379852848	248.777661454116	386.05374792908	115.374419427156	98.6710878516344	103.8137085772
ENSGALG00000006409	PODXL	-4.33708923609485	5.4071669441282	6.55135166912283e-16	5.08727032714145e-15	1587.54732418433	2342.43484991747	2182.4406104708	74.2993686893167	190.057229749701	47.7813252173068
ENSGALG00000006413	CEMIP	1.90671110490504	5.02178731297228	3.03099066818283e-10	1.40167465941802e-09	299.043708698773	344.796546744281	388.520767312473	1900.62281293037	989.041890409017	1556.43620806927
ENSGALG00000006420	ABHD17C	-1.59181965636136	6.13409577163555	1.07227705497818e-08	4.220062486699e-08	2624.86373182063	2808.95636300642	2544.19513182619	1249.59628812579	842.156307123891	878.683877278003
ENSGALG00000006421	SLC16A12	4.07115492707639	1.15763973618189	8.52711082776663e-10	3.77991547154642e-09	8.30653079690073	6.84832920684214	2.88130819006363	124.41395357759	147.911716885719	56.0150521195301
ENSGALG00000006424	JADE2	-1.79273499424806	4.80764771442067	4.96455926838024e-09	2.02040348501157e-08	805.111868523993	1265.70763017775	1212.15426961106	412.0270711791	259.741411854968	419.795682028254
ENSGALG00000006431	PANK1	-1.41576849704205	4.88140386588159	2.7918591183554e-06	8.22853944149947e-06	1406.42350014779	903.183586424703	930.327399743982	499.189322094623	395.623699465794	480.858835562319
ENSGALG00000006439	ARHGEF6	-1.59769306597884	6.76850030430727	1.66713575997777e-08	6.40348148988855e-08	4349.8304345459	3748.58195527279	4301.01220218667	1059.32148682894	1611.89582815603	1985.26086045927
ENSGALG00000006445	ARNT2	1.65413325150899	6.93095643084835	3.34941230317222e-11	1.7085867452682e-10	1487.19782279141	1643.21142820494	1321.48778372725	5102.33333645389	4573.20965002738	6348.83931328374
ENSGALG00000006456	C14H16orf45	-1.85126537974737	5.41000306851856	6.86287242893841e-11	3.39762138951139e-10	1907.69944361263	1688.66195707019	1437.77870869524	522.381746351232	525.828967644409	510.912512784964
ENSGALG00000006457	RBMXL1	-1.04762176074734	8.0959324499343	9.42444401976473e-05	0.000225706755207908	8873.34997180055	9746.340193551	9291.64825302321	3936.19689179919	5371.49245580093	5902.74176160144
ENSGALG00000006459	CCDC174	-1.04621863405772	5.20417472803646	0.000180807793863423	0.000413243799760568	1446.8106614696	1280.77259545903	1027.23650388398	696.877128853335	649.023182921099	698.747995426495
ENSGALG00000006460	TTLL9	-3.00138408659058	2.44331417675511	4.11860908077706e-08	1.50981515307756e-07	257.552996903044	220.247963954541	247.385858737158	50.0789492994675	7.51341930566124	51.0778804952322
ENSGALG00000006462	PPP2CA	-1.08782738375099	7.85645504839227	1.22063641924982e-05	3.30798954403564e-05	7770.06753212378	7039.5035648723	9040.62045607683	4192.31886278853	3512.31468368757	5180.64068098963
ENSGALG00000006467	XKR7	-2.28819517202456	1.57401988552508	1.146379046757e-05	3.12077694933048e-05	93.6371020505579	130.827860051186	142.673525142545	22.0900294571545	10.9135046997886	58.9936905497954
ENSGALG00000006473	PLXNA4	-5.0130350517251	6.1249841436027	1.96645508799379e-12	1.11505317794193e-11	2911.43904431371	4534.73532313064	2797.75025255179	55.6588739689217	232.554838109338	27.5895032827537
ENSGALG00000006474	SKP1	-1.63449455745178	10.307528888735	3.65265473403057e-10	1.6745648025388e-09	49702.3556007355	39483.0184512498	55900.5827001309	18736.1064760644	13894.1225581083	21085.2268527224
ENSGALG00000006480	TCF7	-1.3936965474624	2.85049280674592	0.000759522159046753	0.00157338987156325	338.318645693446	261.624192873006	184.766067439047	124.597961953511	68.4832920684214	157.511514390145
ENSGALG00000006486	RPP30	1.30803344133254	3.84475304068795	7.49833234394203e-05	0.000182410825160864	221.984632170397	227.358429819583	172.808644030208	498.900228092966	487.136437581323	798.178621371257
ENSGALG00000006489	CHCHD3	1.95534365983913	6.50738689492129	3.41780843468517e-14	2.27790920950902e-13	1100.08127373869	897.730073583843	823.504870712495	3912.37600534024	3779.13633397572	4737.83110052797
ENSGALG00000006490	SCN3B	-5.93470632610979	6.93601513634576	5.12052533609702e-37	1.71066819981498e-35	6941.11153644584	5562.58257763589	5730.73759369248	142.224216010488	128.562952563537	48.7021651233609
ENSGALG00000006491	ANKRD1	9.05033882592211	0.377323646841742	1.79846819990718e-16	1.47332203430321e-15	0	0	0	58.4377057106985	90.2771841311081	51.2775197454025
ENSGALG00000006502	PCGF5	1.08238115473086	3.39584137172968	0.00999156120755032	0.0170969005671191	219.146534618948	139.263229186409	148.423663917125	347.122295119086	210.683479613755	746.549455371453
ENSGALG00000006506	C13H5orf15	-1.19450942589181	6.80226286893805	3.39461556438712e-05	8.68830301629995e-05	3854.22992224179	4502.91203913276	3397.69458325923	1401.21234854228	2172.15780338954	2172.0617467701
ENSGALG00000006507	CLMP	-1.15555139876552	4.3127523706202	0.00228079134646597	0.00435128533201643	814.870372551844	665.4423585142	590.26454339817	176.704184812256	385.6079096059	499.224971642824
ENSGALG00000006508	FGF13	-4.62187535034729	3.6440681356623	2.29681794232734e-21	2.81021184216674e-20	603.616601857327	560.986566749324	645.832769459032	18.2622112182457	41.2987507242454	19.6443084596194
ENSGALG00000006519	KIAA1024	-6.13056149335587	5.40237555881875	3.54653753912103e-69	8.39959417524326e-67	2374.77862267399	1939.95193996356	1993.13260079045	33.2261231876029	21.6863758216668	49.9426752944363
ENSGALG00000006525	NCAPG2	4.83109369084639	4.34457982017388	6.33899762418983e-26	1.07237404961262e-24	37.1059159792811	17.9546014716769	48.4906421333246	728.898077428039	1255.52702125439	1342.68961656965
ENSGALG00000006526	PLXNB3	-3.2891455652643	6.8051368454813	1.84368791289805e-18	1.77580485030987e-17	4165.77359280551	6001.05702934681	5183.69108698978	427.28105007181	802.899639740688	461.727912541091
ENSGALG00000006539	C9H21orf2	1.60627636837343	6.67426143484399	1.02312575451811e-08	4.03380406723355e-08	1108.0554051092	1250.72414881817	1459.8727875553	5237.83045503309	2580.69170223366	5834.35961250697
ENSGALG00000006542	ESYT2	-1.41212077608206	4.50865812796789	0.000105915021248496	0.000251387066359843	1025.55039490805	635.195128044897	838.240476703139	331.522644362475	179.487238968574	624.813142802143
ENSGALG00000006546	CD81	1.6865020241984	6.92761392550001	3.37437361820445e-10	1.55396935063353e-09	1487.34479419419	1121.16912527812	1755.65365981286	5704.62407167602	4024.37079737738	6477.31277452426
ENSGALG00000006547	PROCR	-3.67500044953411	2.24236453966065	7.98433707162585e-14	5.13063287698516e-13	146.307971953997	246.080974858184	264.802062664563	18.2482852037363	12.0048551697674	29.9243357861281
ENSGALG00000006558	DYNC2I1	-1.15244841671482	4.36606072355164	0.00254886414616127	0.0048252333957375	973.48461922114	610.456450037013	563.494703411393	296.958475989201	455.413892255002	298.695615703263
ENSGALG00000006560	SEMA3A	-2.81703646276565	5.99925396698534	2.69825644701639e-15	1.98706136906043e-14	2471.18215556995	3244.73059361505	2757.34694842868	283.840284880536	598.680273711559	431.197325131793
ENSGALG00000006563	SEMA3D	-5.31679165972512	1.80366698856144	1.46484045370264e-17	1.30565718665713e-16	143.601672498361	154.616161710724	209.330008071774	0.834824367295693	8.31500380154943	4.6615927041275
ENSGALG00000006565	Uncharacterised	-1.77658124196199	1.42802285761295	6.90591800226692e-05	0.000169053507685615	105.647966969	115.683149817759	87.2080642910019	35.1139132689592	18.6896942930266	52.5038572524564
ENSGALG00000006567	UBASH3B	2.90857793209864	5.84285749430908	1.39059467851039e-21	1.73340763356047e-20	259.892597466359	421.881241239261	337.532118278411	2901.84950071983	1855.43370543146	4284.00369509317
ENSGALG00000006575	VIPR2	-2.92993313931685	0.885828630389937	9.48869667906968e-05	0.000227163509123648	122.588528213503	62.0978971313397	55.0984082415157	5.93928842967816	23.3079635206375	2.64297556745449
ENSGALG00000006583	LSP1P1	-5.29200803478375	3.09057970743815	5.91880232770487e-29	1.24604881384682e-27	431.820851634951	452.713701667187	366.487897242809	13.066434545292	6.99238905619125	16.7388452605451
ENSGALG00000006584	Uncharacterised	-4.77835431953547	3.61442218212892	1.59315913438561e-27	3.05789719238152e-26	741.902330741232	545.527683985381	495.473113370401	31.6342978310497	13.3767288643654	30.1111741387651
ENSGALG00000006591	TNNI2	2.2515924329412	1.84300035036146	3.82599754522739e-06	1.10771022576623e-05	26.8041580487331	32.5966986652721	32.0276334972214	136.214742094552	85.1520854641607	310.0308560292
ENSGALG00000006599	ZMYND11	-1.32331975572763	7.69951559756673	2.35605551592312e-05	6.16217004687209e-05	7276.99272905804	7801.4897594611	7400.66712747531	2269.88745467699	4227.58550424492	3387.81249772466
ENSGALG00000006604	KIF3B	-1.89309661101467	5.87425200212579	5.52366229553789e-10	2.48677301512964e-09	2311.76960449439	2538.48119317082	2140.01749921939	539.249382344731	847.266141283874	689.398473488775
ENSGALG00000006609	EPHB1	-1.39810541719062	4.9524107945881	3.20613637542876e-06	9.37662331804005e-06	1353.27458277378	1091.81076568245	947.239612707875	586.648737531114	407.475587807107	456.207130093409
ENSGALG00000006623	ATP11C	1.92175411245524	7.01429460369213	3.54761954237016e-14	2.35968294836788e-13	1281.61655266874	1281.65783431701	1520.09513583283	6148.6582395431	4343.09187848925	7429.91399961606
ENSGALG00000006626	PDE6C	6.94249226652404	5.3709570944753	4.09807114604653e-16	3.24687679868669e-15	18.3661360805052	15.4421499171632	16.3155744644462	1970.77878146523	3979.15736174099	270.426326217125
ENSGALG00000006631	TICRR	1.91306310051977	6.27248544217139	1.46496281233768e-11	7.67976354942079e-11	946.303318937882	704.793484654532	801.795238585612	3191.03064936207	2238.99895308705	5553.23468174908
ENSGALG00000006637	Uncharacterised	5.42139683522982	3.95690601087189	1.05957915435619e-31	2.6465533567281e-30	22.088023101532	20.031579719787	10.852716774844	1185.48197056376	609.50324606467	799.059613227075
ENSGALG00000006639	CEP55	4.63029236530894	2.83627120976575	1.27449760790242e-19	1.32994978549251e-18	13.0962056397463	20.5195445390593	7.52440998620554	313.571537583003	416.60669341623	419.710559685936
ENSGALG00000006642	ADORA2A	4.13083993566403	3.30251635356671	5.15698634228751e-24	7.57443077051597e-23	27.5895032827537	28.03454143954	23.9691522239475	528.239834844999	455.093145981183	614.731355149318
ENSGALG00000006646	ABCC1	1.42163849265413	6.92429464723815	2.50708385119183e-07	8.5020335255324e-07	1979.70975254165	1487.6669790818	1528.29127275375	4653.73387896363	5289.19292408441	4968.33575573306
ENSGALG00000006649	TMEM41A	-1.18113913922297	5.15472532708284	7.48281900644628e-05	0.000182100235747701	1129.6881883785	1499.78409629843	1107.38278104779	816.330151544185	428.345492252862	641.246939935517
ENSGALG00000006652	DIP2C	-1.32688607931032	6.64218846827611	6.23122257384e-06	1.75131818175122e-05	3004.74772115808	3911.33768899063	3887.56821308405	1171.73199729254	1866.20930366385	1761.26090626925
ENSGALG00000006655	MAP3K13	-1.24487887588413	6.06411365892365	7.00277589705659e-07	2.24126005604878e-06	2615.15350701553	2160.19203046614	2342.43484991747	1032.62793455502	991.771348347283	1419.48993469308
ENSGALG00000006658	FANCI	2.74308130971891	4.23956918408745	1.18199824265711e-16	9.82258314057724e-16	137.216321080541	99.3440997081875	133.040060824791	837.921288566918	886.277806953074	1086.73073659537
ENSGALG00000006666	BPIFB2	-2.35580382407838	3.38671178525662	7.62220183112009e-06	2.12068938296929e-05	311.389489001293	397.932324788437	607.172449712607	58.1454624839989	151.302958245494	62.0978971313397
ENSGALG00000006676	RLBP1	-2.53086366669963	4.23898628373727	1.01622115502908e-12	5.91405931511658e-12	997.494329560675	672.015083654191	761.637499714805	127.712911002349	108.431879108334	263.159481359145
ENSGALG00000006681	BRSK1	-2.2685751464288	6.94496927610933	1.31385678789909e-12	7.55012243410125e-12	5889.39840686887	5441.24408389282	4115.11295852665	1107.71435854183	1421.24058111889	970.065914797595
ENSGALG00000006682	BEND7	-4.20897767361083	4.46704786933453	2.90665670930743e-29	6.28890504658147e-28	837.32884039758	1140.34337849821	1192.20233408061	56.3834787723625	39.7584415827576	107.168951500861
ENSGALG00000006690	ECHDC3	-1.15977034711616	3.44474089078754	0.00138248804441272	0.0027392941685292	465.686386065265	306.3791042101	360.145655093023	176.981071649386	188.946295209161	204.54832087368
ENSGALG00000006695	BCR	-2.68897170793516	6.68997099471579	2.32700975140794e-12	1.31276607115795e-11	4175.72731369856	4309.81483098773	5036.87261197068	747.609271746933	1038.23138448626	447.453692691331
ENSGALG00000006702	MFGE8	1.54430820002559	7.87043043222297	1.52156755149928e-08	5.87497829273217e-08	2648.88266273183	3948.5060003835	2447.81066730528	9880.3863574419	7899.51078785259	12665.9848680545
ENSGALG00000006703	GTPBP4	1.61809307478343	7.42315125798628	6.20706273564825e-08	2.23525042256049e-07	2503.27528211647	1678.2894853336	2199.96710091259	6843.78921126523	4397.01994254641	12205.2377229886
ENSGALG00000006705	Uncharacterised	-1.60957740717667	0.723716381765185	0.00694966470468301	0.0122457025346367	81.7256854756684	52.0821072714462	47.5849889358545	14.2542922312276	36.1273434569881	12.3338859814543
ENSGALG00000006707	NOX1	4.57404061432017	2.35073470378437	3.38219978212624e-17	2.93958818547446e-16	16.3274130770273	8.73080375983085	5.12988613476482	244.961347328692	182.743677531816	433.727516433335
ENSGALG00000006708	Uncharacterised	-3.68091814150183	1.48492701684737	2.9824252720655e-10	1.38114198266078e-09	174.616075196617	93.1929314482276	117.88242311722	3.11494904883777	13.6966584136843	17.2878491403818
ENSGALG00000006710	RAB36	-1.53714065160025	2.74896888225885	0.00160261284076603	0.0031368733924262	216.3410609737	199.523023783671	333.788009747913	75.7508814420718	134.791753940179	66.264069304596
ENSGALG00000006715	OAF	-1.20729064753893	2.38834794968094	0.00992132814667425	0.0169789129302375	228.068675699641	208.606273509705	110.123981977271	119.275324748273	43.0678963975421	116.040587054101
ENSGALG00000006717	Uncharacterised	-1.770202455233	1.44310077404801	0.00100611566377035	0.00203571503410926	98.5921879326575	109.547428546996	103.076047130725	25.4012265667618	52.0821072714462	19.2009604478009
ENSGALG00000006719	GNAZ	-4.16448291450554	4.22525702393004	1.75560177259112e-21	2.17206588711529e-20	1185.02243939719	790.245819945598	702.087292895678	45.138592065554	27.969556224765	107.481006409816
ENSGALG00000006723	Uncharacterised	2.82243965925891	7.0017380770435	2.37243777919312e-24	3.56349289529314e-23	796.842312933469	704.786402041252	899.181958764504	6423.73279601793	4270.0987376743	9298.30600421986
ENSGALG00000006724	Uncharacterised	-1.3665787278386	3.02301463960763	0.000284390017481652	0.000631697337440822	322.916384729516	324.154249123861	233.385963395154	126.596654517547	94.9028934931492	175.569566344796
ENSGALG00000006738	CDK5RAP1	1.20659374199754	5.08331204388083	1.60920511158338e-05	4.28744222477508e-05	569.684945328963	494.179030982344	484.070375779223	1642.61646508712	1020.40105181948	1412.80144919453
ENSGALG00000006751	THY1	-5.91281691186854	2.68921273750812	4.18726922131878e-26	7.225024643353e-25	332.587617737252	247.46948399076	372.75556951092	2.28277640228071	7.68348850683635	7.639453289852
ENSGALG00000006755	USP2	3.56017603558259	5.36752459640513	7.160870693147e-30	1.62627787676727e-28	213.904692115856	151.331640975562	122.062650887334	2010.18045284998	1938.07716553633	2618.14870870449
ENSGALG00000006756	Uncharacterised	-2.30134203627285	1.05581392477557	0.00023506500079567	0.000528418153483554	92.7696970264344	129.203689192626	32.558150324532	28.5085844624552	17.4809726404781	10.571902269818
ENSGALG00000006758	C1QTNF5	3.86229947266582	1.00722744219136	1.19023199566739e-11	6.30685056273933e-11	6.6264069304596	6.0094739159361	5.84377057106985	89.0893264451724	123.532206659379	87.2181937259983
ENSGALG00000006763	EXOC6	-1.9026740135864	5.22488692073008	8.34692232957202e-12	4.47655603951127e-11	1776.06682027258	1215.76876102907	1468.85353625188	454.716859639165	375.670965283062	535.72381635697
ENSGALG00000006775	TGM2	-2.23064362138533	1.11482118437548	0.000233673161209543	0.000525556577432961	91.6231530050891	88.352092406128	83.1310558371161	26.7143797534622	2.37571537187126	39.6235379850837
ENSGALG00000006779	PDZD3	-1.55912936433154	0.717083910946007	0.0013161085191335	0.00261741599779092	46.7242357325666	82.1799504821057	49.9426752944363	18.5529579896406	17.0996204492161	35.1139132689592
ENSGALG00000006783	PLOD2	-1.56753024156959	4.70943441832349	1.16135383216685e-07	4.07056973467995e-07	1068.96533851361	1107.72072702854	779.742692484253	372.040271540163	274.115516297724	515.907466915441
ENSGALG00000006785	IRF1	3.1534517547334	1.90988826580948	8.97357918430314e-11	4.38757667502716e-10	18.2622112182457	13.4461048869636	24.0097103395348	134.232020526346	151.324245278134	301.111741387651
ENSGALG00000006787	CCDC71	-1.61895210564338	4.7435078659714	6.85412286798453e-08	2.46091585268216e-07	1048.93575684799	940.266906024099	1062.97535775941	295.823433771438	394.613501498779	428.82465239
ENSGALG00000006792	VSTM2L	-3.77368212631266	4.24835360699718	6.76714410771019e-11	3.3527318752544e-10	632.334656914068	1132.25709553123	910.493388060108	48.0194206790697	17.9546014716769	183.093976331002
ENSGALG00000006796	SRPX2	3.10138728020118	0.0509487516382597	5.00667194431165e-08	1.81877540392784e-07	5.19158174806296	5.70694100570178	3.84174425341818	61.115626318816	38.4741460107361	46.8185510252789
ENSGALG00000006797	ADARB2	-7.18298046261172	3.40430274206662	4.42720226606313e-41	1.83493698921235e-39	479.702153521017	627.763510627196	477.336723487209	4.36540187991543	4.27490511230402	3.34418221609135
ENSGALG00000006802	LAMB2	-2.40282744771889	2.85607908676186	0.000604693900953169	0.00127444068144635	305.334322120351	284.560369429267	324.69393959252	16.0252637758296	18.3661360805052	191.245087435637
ENSGALG00000006805	PLSCR1	-1.19213831096741	1.07660326357509	0.0259797041056595	0.0408741180964841	73.1223240329077	75.0992785452088	67.1057920612865	11.6875411421397	35.635730578069	62.9315015057212
ENSGALG00000006808	TSPAN6	-2.84670307704376	2.82961476790551	1.84713162654178e-11	9.5959681797194e-11	256.368630043086	348.990765004206	332.524223348464	35.8974477937148	40.3871613218115	75.7508814420718
ENSGALG00000006818	Uncharacterised	-2.09509107424933	7.5689755986542	3.91265488761164e-08	1.43908879019393e-07	7419.36858941386	9434.72481296722	6441.42702321969	980.681434868789	2725.58041773305	2309.02833090694
ENSGALG00000006819	AGBL1	-2.50222012816319	3.10929314182498	4.37071443948291e-09	1.7908182147316e-08	306.669482064059	399.276137489195	397.121638160848	102.793318611647	57.0694100570178	58.5865998646272
ENSGALG00000006822	PCDH19	-4.56419720861653	4.57681620285226	9.24314001918163e-28	1.79753322689745e-26	924.666382749259	1210.67686364828	1322.86892512167	26.8922097739272	64.3896777287525	74.3833489540899
ENSGALG00000006826	KLHL25	-1.92113422039009	5.00841233430633	4.33341562552089e-11	2.18449606390283e-10	1370.56183345006	1475.32584636231	1004.29371385672	406.247328589986	270.372376839395	505.689325239626
ENSGALG00000006838	Uncharacterised	1.47378245852202	1.9018584091978	0.00164399371559471	0.00321170844747867	65.3321727264598	45.4505288652431	35.2396742327266	154.616161710724	79.1247398931587	253.786607657891
ENSGALG00000006843	NCBP2	1.0583481948881	7.70101412163634	9.20520730335104e-05	0.000220855037019437	2791.6526842368	3539.81590408818	3881.94132436217	6577.48519553842	8125.07929789855	9338.72246536471
ENSGALG00000006851	Uncharacterised	-8.9847319751999	6.06048511939366	1.26028850521299e-61	1.85724516051554e-59	3694.31221802104	2759.26649242249	3621.33138749617	2.0031579719787	16.6964873459139	2.37571537187126
ENSGALG00000006854	NEURL2	7.25957567314894	0.707852282828994	8.31154431313741e-19	8.18381679473953e-18	0	1.16539817603187	0	70.6816739249024	72.1136869912333	126.893303828945
ENSGALG00000006855	MELTF	-2.25958738871337	5.406235758208	8.75829452448739e-09	3.48100869877963e-08	2241.9343448055	1965.09797051111	1100.29851609572	494.148797349223	454.505288652431	252.844662619813
ENSGALG00000006856	CD151	-1.77364898483821	1.80737974264973	0.00252263045214408	0.00478102996381636	109.242990121452	142.467749004881	151.238426884392	10.852716774844	62.9564573545885	57.1045106255618
ENSGALG00000006864	Uncharacterised	-2.65847300866948	3.45050493484546	4.86938971684202e-12	2.67423253890169e-11	506.38661807019	476.224429510667	439.759961416013	101.755002262034	47.938304447895	114.291891539191
ENSGALG00000006868	CRACR2B	-3.0930744583717	1.0532766392275	1.09634071777035e-09	4.80210268817311e-09	103.3436186764	83.9086686742949	86.3372018701801	16.566017326149	10.0157898598935	9.18306804025262
ENSGALG00000006871	SLCO3A1	-2.41027911210451	4.64621505153078	3.37434103213142e-16	2.69277287058718e-15	1057.01614566091	1006.97369120016	1119.86277124767	248.391588525359	169.469346561026	272.01941007926
ENSGALG00000006876	CTSA	2.43769645939282	6.97275633108586	7.44471581192957e-19	7.35214190719448e-18	748.26077085044	1094.38543249167	1117.41904891641	6437.80293266551	5152.26556877018	6658.59220292474
ENSGALG00000006882	ST8SIA2	1.86207653666165	5.64706495446217	2.72119432890469e-08	1.01903933551769e-07	508.77501131017	609.50129940895	515.75416602139	1942.60383656236	2801.77281060405	1686.30388246406
ENSGALG00000006886	DACH2	-3.09783590944019	2.95015682016583	1.06145182733187e-09	4.65389606145541e-09	301.812445002244	349.912609819443	389.213376588861	52.8239834844999	13.0962056397463	82.0781781562371
ENSGALG00000006889	TMC7	1.91346835959299	2.46864453577687	5.5197218731743e-06	1.56293918027136e-05	60.742063529213	61.0963181453504	50.9242864050373	308.842998343264	144.509373827952	307.466157680539
ENSGALG00000006895	CEP131	1.2503125107274	6.72322344723986	3.52632422749083e-06	1.02542508724426e-05	1521.86621998023	1626.10860257442	1582.39411680959	4638.60164943441	2525.94684662245	6134.48099175115
ENSGALG00000006899	Uncharacterised	1.48422283648919	6.85253923619696	3.93608516972747e-08	1.44650312014673e-07	1114.45469760998	1804.59148739516	1683.6542754481	4662.49409134645	4239.46408110427	5819.99849110318
ENSGALG00000006901	AATK	-4.82124764035523	5.98438022270594	3.82708825708349e-54	3.29601763335704e-52	3065.60347017061	3528.50667969573	2659.46090734665	142.249339896925	84.4627268843864	151.748898010018
ENSGALG00000006910	IMPDH2	1.66459169893906	8.0674771337811	4.43588030226303e-10	2.01677971594332e-09	3066.67235029106	3788.07748129661	2882.99600773783	9590.27855019598	9572.23842707848	16779.5479449644
ENSGALG00000006912	CPEB3	-1.11517000386444	4.01673706775014	0.000967216407306886	0.00196570505824567	522.393404723551	571.019113397598	576.265574034988	231.701804831492	329.429569730609	295.75597736427
ENSGALG00000006919	POF1B	-2.29476430053843	1.8184541751864	5.26288719082722e-07	1.71545030257905e-06	127.728128196241	114.034337849821	194.621495397323	29.0727312419994	23.1924242566086	52.0821072714462
ENSGALG00000006922	Uncharacterised	-2.65794321779664	6.1604092435175	2.25230892948458e-14	1.53034699445461e-13	3365.66993238005	3024.44504102376	2950.95988636468	687.083184388695	584.377057106985	338.539440491655
ENSGALG00000006929	ZNF711	-1.75605803524561	7.49286395853441	4.70632180694174e-11	2.36439189869198e-10	7099.76241051451	6255.29283519887	7676.27277268589	2210.86894560887	2374.19794861243	2386.78347784376
ENSGALG00000006933	MOSMO	-1.96932400876409	2.37932004986694	2.79746157765723e-06	8.23955871740347e-06	254.056802374949	157.697542191451	208.731818309477	49.0773703134782	53.4287595069243	79.5864649576874
ENSGALG00000006934	PATZ1	-1.1200984179738	4.78151095326619	8.38419008304569e-05	0.000202438581961469	1010.59053520042	943.044067774266	892.060606142368	391.445263803947	450.848339450441	663.66131977799
ENSGALG00000006937	P4HTM	-1.57958784922168	4.44635610841615	6.81250502193421e-07	2.18510892638243e-06	598.569071351012	855.257533873655	1011.56561679567	294.251279843267	272.78708530392	376.593698731996
ENSGALG00000006939	PFKP	1.58089125224342	8.60352706101813	1.74733441915895e-09	7.49269201464764e-09	5274.37792756069	3990.44542935101	5483.34864230409	15987.424533373	15504.3193707324	18466.7413025122
ENSGALG00000006947	BDH1A	-1.45456662410049	5.87063772724441	0.00250376373355619	0.00474866557960185	1973.42175703269	2427.47373885837	2083.28429085785	473.345416256658	1525.20926874135	435.858917835921
ENSGALG00000006955	CCNJ	-1.08100533338285	3.81496933309817	0.00171645262211513	0.00334145180201276	525.694949816462	494.780019078739	419.916656749734	234.00796412932	276.199367719554	246.677719629086
ENSGALG00000006963	ENDOV	-1.3751358270489	4.05916065722404	7.76996272865775e-05	0.00018867267607138	724.593188420736	646.79598769769	444.019895332355	279.41349223438	263.415273315199	235.420471577385
ENSGALG00000006964	SDR42E2	-3.99919567293748	0.984306879252843	6.44894916425826e-13	3.8243839461047e-12	69.3917809838956	88.2568897170702	116.421596516316	7.68348850683635	5.45675234989428	5.98486715722562
ENSGALG00000006966	ZNF518A	-1.81219054380512	5.04593596605352	2.71335397271604e-09	1.1428140279496e-08	1277.37996426154	1337.99567619408	1270.50179937675	286.763625029833	452.70592843109	510.200525909739
ENSGALG00000006968	HNF1A	4.05701346196512	0.252833771518267	1.17465079650925e-09	5.12480049805992e-09	1.16539817603187	3.52396742327266	4.4176046203064	87.1373717810735	27.5492041207579	68.8957457842667
ENSGALG00000006974	DDX27	1.43462029353243	7.16166931740357	1.45880790007326e-08	5.64415670322975e-08	1697.19793871214	2022.92163914838	2129.18246761023	5260.40237109026	5055.94848794067	7942.52135889555
ENSGALG00000006976	Uncharacterised	-2.64944616477956	3.81369558328472	1.7907841880406e-10	8.49773548693471e-10	701.953743701319	549.369428238799	577.324398618815	104.307684740218	136.275425305723	74.7587771721066
ENSGALG00000006978	APOOL	-1.12688731336453	5.74961739726109	0.000275424218984263	0.000613322937607166	2448.45736080482	1676.64322254617	1457.60334529828	896.832552881402	1061.67773836504	863.372018701801
ENSGALG00000006979	SPPL3	-1.07215155865782	6.69089503708385	2.83654076450836e-05	7.33496591142023e-05	3529.2372723332	3841.91268503844	3224.18386468121	2262.36952426617	1501.34667544117	1967.21518861574
ENSGALG00000006982	EEF2K	-1.90622231015184	5.08247201162395	3.48211073341501e-08	1.28787603617633e-07	1122.00394964541	1471.75567287425	1447.42453463159	312.752108815448	519.068542886002	341.538434222369
ENSGALG00000006989	Uncharacterised	-7.57824060565532	0.512698140233668	1.22327688736475e-18	1.19208827017772e-17	86.2394650263587	55.5024869165444	65.1596681495194	0	0.834824367295693	0
ENSGALG00000006997	BRINP1	-3.47295913842961	6.43314757543269	5.01862676051356e-14	3.29678289869695e-13	4099.14111839719	4311.92570688646	3587.50037024553	277.567123935582	139.134390848087	947.352206946496
ENSGALG00000007000	NR2F2	-1.5087817731075	6.05001014417363	1.54794628456062e-06	4.73378177821708e-06	3111.09805385078	2246.54166557411	2060.34653848577	990.673310070317	1089.6472945898	776.153824975803
ENSGALG00000007001	TLR4	-1.75691961138402	0.298182997143111	0.00404775262291882	0.00741920163595527	47.4892496682938	63.0994761173291	25.8795553861665	28.5085844624552	4.6615927041275	13.2148778372725
ENSGALG00000007007	Uncharacterised	-5.97270469246376	3.87882133655097	2.11713878998919e-30	4.96106215046407e-29	877.826829906432	783.147574293419	524.190154211808	9.9396103956894	20.031579719787	7.51341930566124
ENSGALG00000007008	POLR3E	1.79715864724168	6.21134717434076	8.13628401536493e-11	3.99968624521071e-10	784.017597596557	774.178183025148	944.867878147458	3502.92038929975	1995.78613965074	4783.38910991733
ENSGALG00000007012	ARRDC4	1.02887523350283	4.76770836785929	0.000783866258070727	0.0016186234128588	449.7069512493	355.361343441181	546.766585459407	1078.98605034553	663.820169894133	1509.71197233671
ENSGALG00000007014	PYROXD2	2.2557912606943	0.47101062871056	9.7232799122791e-05	0.00023206741313039	9.82215422980971	17.0996204492161	6.6883644321827	44.6476030333414	33.1002578330703	119.094071855964
ENSGALG00000007015	CD40	3.1381761855258	0.410158614664785	7.04591552739434e-09	2.83439422626118e-08	5.28595113490899	5.522005775383	8.01263188791481	50.0894620377416	48.7021651233609	99.0588449627093
ENSGALG00000007016	Uncharacterised	2.74353000829693	2.67598593442674	5.01459625629257e-11	2.51165370646557e-10	41.5326539845036	39.9485870399125	42.2591867876	327.405140993657	303.518262973585	298.468262786153
ENSGALG00000007025	CPNE8	-6.14792821021411	2.63535126474008	1.05511974219561e-29	2.36786009149584e-28	358.219140616344	262.519286262282	299.656051766618	4.36540187991543	4.27490511230402	5.85231887815987
ENSGALG00000007027	SGSH	1.61998253799861	3.56581544229465	8.1271788088074e-06	2.25550894624843e-05	161.254216744285	146.094264276746	129.476487766984	653.788376753881	358.563685317993	523.486147506308
ENSGALG00000007028	Uncharacterised	-7.05908422016896	4.57267316019767	2.45409523396697e-47	1.42757303018e-45	1441.57329804027	972.921732178153	1153.55744676765	5.12988613476482	16.7209110804568	7.26821444728814
ENSGALG00000007041	HDX	-1.85632918980916	4.78093992479549	1.3174765656645e-09	5.71970268098471e-09	1341.09132742133	1043.03136754853	871.300945404165	319.171933817137	335.528960306433	355.635180467965
ENSGALG00000007045	ADGRA1	-9.14973647814296	3.95394375517895	3.29660588934108e-56	3.21491793458315e-54	657.967851015973	865.955835576901	810.385622809653	0.960436063354544	3.27405140993657	0
ENSGALG00000007047	GAL	-6.0896693511095	2.07902235237868	2.2740170257147e-23	3.22569923123572e-22	214.433264389865	153.292582912361	255.116666822695	6.0094739159361	1.66964873459139	2.37571537187126
ENSGALG00000007048	SYNM	-3.6910794990144	1.53197402618204	1.11920837303786e-13	7.07871275708209e-13	119.379884523284	123.537199337306	156.163355588271	7.92892670236348	8.8352092406128	19.0300007337977
ENSGALG00000007054	TBC1D16	-1.92311978000033	5.41202978689778	1.22438062931812e-12	7.06348859793226e-12	1661.55438960336	1992.80595818139	1441.49800386891	487.414557995315	405.981692698523	658.580992057986
ENSGALG00000007058	LSG1	1.25784380330297	6.08278610932707	8.11758668022883e-07	2.57445127068089e-06	976.388327650237	877.84783172398	1167.06757696455	2806.67358660414	2081.2649492893	3471.58584500274
ENSGALG00000007070	Uncharacterised	-3.88030078361349	2.76431528021214	2.35537305615251e-16	1.90483614900919e-15	336.709519336405	208.414625747936	410.34777671205	24.7944496513633	21.7371844045938	26.9962250899274
ENSGALG00000007072	ACADS	-1.05515381780884	5.67009906316692	0.000114274364960828	0.000269731429520459	2012.23091997496	1838.9983217783	1348.79853125761	1093.35714352583	721.136869912332	1049.37422969069
ENSGALG00000007077	CPT1A	-1.44683887415425	4.86874628954268	0.00354804516382214	0.00656222605044945	856.110647319386	997.8220119777	1374.23139417299	335.192186110736	711.560506426215	175.271109604465
ENSGALG00000007078	ENTPD1	-6.57873859808179	2.75746960846415	3.81898726742946e-30	8.79489754800226e-29	295.823433771438	435.579733645899	275.153832647337	3.42416460342107	1.92087212670909	6.54810281987314
ENSGALG00000007079	PAPPA	-1.22338702041837	1.86778842916259	0.0077357784727865	0.0135088386944789	118.368063855835	167.784065567632	94.1227342087454	43.6540187991543	73.5283679316291	63.5394621057357
ENSGALG00000007080	Uncharacterised	-3.42302822237087	4.15610631866616	6.80893639263974e-10	3.04063715069296e-09	586.826434709627	1283.42815269514	593.356829587798	34.2778677149364	48.8008684317918	202.025711601843
ENSGALG00000007090	CPN1	-6.01547722721827	4.46433538685257	1.11365451173618e-51	8.48873551100975e-50	915.443193194267	1058.55729773094	1309.01916990107	19.8117689925419	15.857853404727	22.088023101532
ENSGALG00000007093	CYTH1	-2.56255660019159	7.0612318043303	2.42385749269286e-17	2.12757259600168e-16	4289.32759916527	7238.80473809174	5755.90159142143	1110.04973833089	1117.65396893752	1030.62477658304
ENSGALG00000007097	RPS6KA6	-1.46469671413709	4.62933237199759	2.86162316079463e-05	7.39550038613e-05	788.90902709443	1053.62976742491	900.852790072639	246.677719629086	463.848485132172	387.611067577879
ENSGALG00000007098	KIF21A	-1.39454209001779	7.78678920084607	2.27156049569784e-05	5.95173979740033e-05	9718.73016467408	8281.05505615995	6224.45048255669	3476.8594467336	4041.60087447854	2485.27802526304
ENSGALG00000007109	APOA4	10.4719526888428	1.76383005251655	2.14951295897309e-18	2.06287918776122e-17	0	0	0	93.1468456970096	78.4734905257951	454.949493713347
ENSGALG00000007110	Uncharacterised	-8.98058802670653	4.16162500643206	6.4324551038157e-60	8.28287883902016e-58	981.424927381435	809.526046671148	905.427403334373	0.834824367295693	4.75143074374253	0
ENSGALG00000007112	LINS1	-1.73153656897325	1.86314344435521	7.02143231899195e-05	0.000171564585200424	148.380466148246	140.223665249763	127.688004987526	30.7793168085889	51.834824349416	59.1840319279177
ENSGALG00000007114	APOA1	7.75683146651314	9.68383392021633	3.03634780609578e-47	1.74333683775967e-45	159.684700818362	231.544545963608	181.480723981317	18362.5770952755	63660.6556148067	54839.3377616584
ENSGALG00000007116	CABP1	-1.15495733498568	5.92184201187357	7.9915945963637e-06	2.22020358465797e-05	1888.65307861591	1959.69077862953	2477.42281017564	1172.20568257115	842.302427561935	1244.1395357759
ENSGALG00000007118	Uncharacterised	-8.57560729786259	5.26532558810737	1.54545207227427e-48	9.35951179660897e-47	2897.98464269536	1113.14539742792	1789.81477076532	5.12988613476482	10.0325466482741	1.03831634961259
ENSGALG00000007124	POP5	2.04393314020041	4.34167933545356	2.2320471730274e-07	7.6043261381614e-07	138.21790006653	173.643468397504	283.897986938616	1255.13383558633	483.664528844172	1143.05519550428
ENSGALG00000007132	ACOX2	1.59811490249056	2.69632368365713	0.000120717387316588	0.000283614636189998	73.6471765280092	106.051234018901	60.7884380514534	286.039899164839	267.421589259157	261.300026963552
ENSGALG00000007140	NRP1	-5.62764533008877	4.1195215585033	6.26795432563457e-27	1.14823036216701e-25	879.453948121865	957.624700756759	734.733588466226	7.639453289852	32.4892788535105	15.8848655264339
ENSGALG00000007141	LRRK1	-4.74147044226928	3.57527847990628	6.70482117965587e-18	6.18831199065941e-17	495.336655035159	740.02784178024	497.760398537263	45.2804473581406	7.01105290192545	22.5402579169837
ENSGALG00000007147	Uncharacterised	2.5664161136193	0.310774524222311	6.86822116086358e-06	1.92179783241632e-05	2.88130819006363	15.278906579704	6.83984817968643	55.1790065655073	48.8008684317918	67.341903867281
ENSGALG00000007155	RMI2	2.63535183817825	5.48319940359135	1.74633285495998e-12	9.96198393777815e-12	271.883965142535	372.040271540163	292.805210590751	3473.2442960701	1050.71705330987	2224.17225781691
ENSGALG00000007158	SOCS1	3.36533122295115	0.0705201791836696	8.53668624959886e-09	3.39802130037304e-08	4.0063159439574	5.00894620377416	3.5635730578069	37.29274163302	43.1686009350901	73.9948773901322
ENSGALG00000007160	Uncharacterised	5.04933783819303	0.848557942057316	2.77495016250344e-15	2.04240643758508e-14	3.49619452809562	2.64297556745449	1.1044011550766	67.1057920612865	81.8127879949779	143.730779998212
ENSGALG00000007168	CFAP20DC	-1.99800399719868	1.2685898148577	6.61151708866492e-05	0.000162145989546899	87.2080642910019	107.013830914923	90.3335224162954	44.5141398444739	15.3669770136727	20.7356589295983
ENSGALG00000007169	EPC1	-2.61771046539864	6.98042321743625	2.26113540628208e-23	3.2108606952376e-22	5735.65951525995	5855.32147185003	4845.39993962368	1143.73529253784	768.627939192262	1160.4312289837
ENSGALG00000007171	Uncharacterised	-4.15450320329828	0.900826498694046	6.04742581372038e-12	3.28852023646468e-11	52.8595113490899	90.5608947162812	116.183162374765	4.17412183647846	7.12714611561379	4.6615927041275
ENSGALG00000007172	FHIT	3.03325894721484	3.50394906223243	2.11955904260568e-12	1.1998169689321e-11	52.0821072714462	42.5760427320803	90.2771841311081	559.3911244953	355.03971789472	886.83412752651
ENSGALG00000007184	FEZF2	-11.8497352905307	5.08677115427643	1.28084201330593e-76	4.71883545068792e-74	1084.50097451216	2167.93946741537	1882.96849365998	0	1.18785768593563	0
ENSGALG00000007191	TK1	5.7642421294275	6.47716093609368	2.22724312275559e-53	1.83477798367127e-51	48.4545520699991	99.396103956894	95.1500036689883	3819.3214803778	3979.32324788437	7735.91309249958
ENSGALG00000007199	TRIAP1	1.10907281849068	5.79476365020208	4.15732159744761e-05	0.000104806227612522	821.636762584832	819.324642942381	1016.51170627073	2624.05147442168	1695.16965182077	2197.97984653742
ENSGALG00000007205	COX6A1	1.52088218608621	7.10918806500095	1.93429904546533e-06	5.84520579631049e-06	1429.2532130068	1640.42988173604	2325.82534906197	8267.33466077012	3343.36409282993	6314.965804728
ENSGALG00000007216	TVP23A	-2.18942044530871	4.88233948255776	1.89791618736505e-09	8.10433431842326e-09	1213.2956578122	1050.71705330987	1391.47184922304	359.947010455998	127.078924211471	476.587204472179
ENSGALG00000007218	MB21D2	-2.5311548873072	4.46626469903284	6.18024293689425e-09	2.49523781041183e-08	1089.1677690389	909.699807898295	846.914146225135	141.211023547312	268.226227267984	112.371019412482
ENSGALG00000007222	UTS2B	-1.90208425904931	4.37975952296643	0.000100316572416472	0.000238825830184827	1048.85835842869	636.957111756533	794.064430500075	429.677384989431	195.348901947192	99.7800456185931
ENSGALG00000007224	HGS	-1.07965484264999	6.11963572292991	6.18441738983105e-05	0.000152206212360975	1928.75709313069	2665.35806945552	2544.15430034185	1243.76470204413	1260.50979282558	1280.76157164628
ENSGALG00000007240	TRAIL-LIKE	-1.49247542947202	2.55827265145193	0.000776955796931768	0.00160635459621294	141.29169862986	268.923934549661	240.832910440615	105.647966969	45.836719739112	121.407305189434
ENSGALG00000007242	SLITRK4	-3.26463517239455	2.35667353640566	7.50292382572434e-11	3.6951830189596e-10	337.227295223467	190.660768008759	167.209110804568	28.03454143954	29.6760932296493	22.0900294571545
ENSGALG00000007248	Uncharacterised	1.41954858183669	1.53729412519325	0.00610909940487393	0.0108598023598503	24.2099066515751	39.1993036358759	52.4429179214343	56.3834787723625	115.962121283043	189.298428351987
ENSGALG00000007252	ANKDD1A	-2.12461251978231	2.42693582627231	0.000127802643413381	0.000299002727040337	299.292713025759	193.304744295945	162.79075162266	55.8293112389747	78.0816777941356	24.6677719629086
ENSGALG00000007253	IL1RAP	4.40355654872485	3.4435082700205	8.12940988917169e-18	7.43076246451303e-17	15.0488199724111	44.6476030333414	13.6966584136843	705.92050656559	457.275846921141	613.021393104396
ENSGALG00000007260	ZEB1	1.02796160649654	6.34103120940343	0.000945191020850791	0.00192448088878478	1532.49860148191	1126.78858359143	1374.97943807037	2746.3295795828	1666.3094371222	5549.67110869127
ENSGALG00000007268	Uncharacterised	-1.01411715155407	7.51770626774355	5.20599548855348e-05	0.000129641603763959	6832.34977202617	5794.31077021797	5926.03305198519	3048.86232609522	2809.11306151674	4809.48133140552
ENSGALG00000007269	GABRA3	-11.4678826684152	2.7176514531723	3.54233280368002e-37	1.20158465409739e-35	245.386851567391	350.626234264191	391.993036358759	0	0	0
ENSGALG00000007278	GRIN2A	-6.64508180932108	4.02362405798434	3.85771290453718e-25	6.21687074761562e-24	833.537417360769	865.955835576901	730.488448729828	2.88130819006363	19.6443084596194	2.56494306738241
ENSGALG00000007282	CNGA2	-2.9210284063457	0.0430105424405166	2.12002810228716e-05	5.57563607389144e-05	35.3027558868281	50.2210808501757	44.180058914309	3.27405140993657	12.824715336912	1.67209110804568
ENSGALG00000007286	SIRT7	-1.79788932609153	3.81846561175383	3.84893102610356e-07	1.28004945334031e-06	400.465820376939	588.725370230339	662.005156661407	179.6015438473	166.976621906765	189.805786986298
ENSGALG00000007288	SNTN	4.07288283111631	3.87277316210364	4.94204697940994e-21	5.88387514254166e-20	33.2261231876029	28.5347050285089	61.4679080546908	960.388413581394	660.900330362201	719.835222013663
ENSGALG00000007300	PYCR1	3.65612217997187	7.35821155517322	7.21923485845651e-21	8.49589280636279e-20	606.18154492471	550.117974547027	667.637412800896	11438.9925518287	3189.60816640044	13048.1862190672
ENSGALG00000007304	DNMBP	-1.10813164662304	4.52860668165185	0.000246877166443146	0.000553751371306519	901.455488202536	770.337901237184	708.966629811367	477.625520821792	365.244224364914	400.501838418845
ENSGALG00000007310	CEP164	-1.05550892130169	5.26086140909277	5.37342713430465e-05	0.000133510236197607	1459.07851639191	1197.26793205689	1256.80851447717	694.09423729062	603.578017554786	858.821106931462
ENSGALG00000007314	DSCAML1	-9.19106806850821	7.92182547595669	1.62794491938321e-68	3.53957925668516e-66	10913.7431507779	14854.0260496406	10881.740597807	12.0048551697674	39.3291270331969	15.8848655264339
ENSGALG00000007330	CTNND1	-1.39392789559608	6.77941477609405	1.40951103529961e-07	4.90022145771394e-07	3910.29937264102	4632.89470842871	3500.78945092731	1841.10824285433	1137.97974089533	2392.76237561336
ENSGALG00000007331	SVIL	-1.31516116787477	6.80406298365216	7.95483318114675e-07	2.52585473980248e-06	4577.6840354532	3250.85994796903	4232.06522625353	1678.64638051815	1804.05545772599	1975.40733171096
ENSGALG00000007332	PRICKLE2	-1.20342234412148	4.28002367359912	8.34893508996808e-05	0.000201660765066922	660.04534933974	648.771349921722	735.127975525715	400.627258600265	246.832068282118	369.967809322832
ENSGALG00000007333	UBAP1L	3.17396529310748	6.44542430989547	4.25392758642674e-25	6.8470681527643e-24	431.197325131793	308.347149536358	574.288600639832	4405.94595936715	4301.01514030741	4638.58426357864
ENSGALG00000007334	ABAT	1.31767219616251	6.22028799531784	7.99066944621268e-06	2.22020358465797e-05	1053.59836149994	1374.01024170338	801.972199068233	2214.6846726065	2589.5609759338	4588.38056858423
ENSGALG00000007337	LPP	-1.38253244800411	2.43639406118468	0.0052274713669188	0.00940732058879838	231.701804831492	196.889392987682	157.154467676955	33.3442598759713	81.0964187402153	149.517554344213
ENSGALG00000007346	JCAD	-1.82256628996628	3.46093137006929	3.58190765682876e-07	1.19634452914933e-06	415.52077691595	416.350685903373	461.01245922799	157.511571757369	89.3205538919726	178.981477076533
ENSGALG00000007349	RASL12	5.50267002531706	4.58212103460178	3.33621642593779e-27	6.24093631272396e-26	14.2542922312276	39.6235379850837	23.7867801070904	1366.14422882975	1602.52637758296	841.502962234058
ENSGALG00000007351	MTPAP	1.90359439027824	7.21257532026994	4.09678214810714e-11	2.07150673390564e-10	1958.10324795081	1505.37321594199	1271.43751139134	7502.50914436945	6230.2186490664	6055.05702503825
ENSGALG00000007358	CILP	1.499151999926	2.68529035970744	0.000445764131114114	0.0009580569876789	56.7680569761071	102.155760990464	92.0664559065181	340.062856345812	216.462626395014	244.385272581402
ENSGALG00000007362	ZDHHC5	-1.14653514101961	7.05184538159243	1.76309965708423e-05	4.67492817910999e-05	4214.2014597093	4806.4258900773	4809.48133140552	2972.17487576949	1815.22415974009	2301.65814118541
ENSGALG00000007371	IGDCC3	3.4769048785551	6.40863031320895	9.69957822405502e-38	3.35014338504275e-36	367.785108382875	353.107162276312	337.762403825227	3908.22273994179	3544.01036454081	6271.64749370517
ENSGALG00000007382	CDA	2.4633311392466	3.7214015481404	1.76385639414052e-11	9.18132941738056e-11	73.464544322021	118.785768593563	111.87822489906	540.928999472353	555.51378100353	837.320032287097
ENSGALG00000007386	LUC7L3	-1.64337985777101	7.68396196836756	1.43285158245502e-08	5.54858701842363e-08	9185.89224277759	6894.97049882227	7499.7604296947	1914.30250928974	2692.06668395354	4113.80937716509
ENSGALG00000007393	SUDS3	-1.19302509570914	5.93781792704356	6.12233541437163e-06	1.72180946990693e-05	2427.52440067439	1732.02998853851	2290.52799562887	994.567933087425	826.476123622736	1458.68923832896
ENSGALG00000007395	Uncharacterised	-3.33958991139902	0.229682847470239	1.46550950411807e-08	5.66843177402098e-08	61.8464646842896	54.0852652434249	37.5670965283062	4.75143074374253	8.15778723222312	3.52396742327266
ENSGALG00000007396	TAOK3	-1.23725374140655	5.38996673660482	1.6557604059506e-06	5.04140272362781e-06	1486.86901264523	1573.97432937255	1390.71141973738	768.310730865115	565.997436869052	830.193235144678
ENSGALG00000007410	IGDCC4	-2.85240370275577	5.9828714561889	3.72077050559458e-14	2.47113566428147e-13	2495.21289259511	3598.18249952029	2311.86868473401	237.436937342486	565.882410538862	482.807209082371
ENSGALG00000007416	CD3E	3.06489226532104	0.392729395198322	5.24906258010786e-05	0.000130624991468626	2.33079635206375	1.76198371163633	15.4616161710724	106.167372514871	40.906393997489	39.1993036358759
ENSGALG00000007419	MASP1	-4.17537464656025	0.428642160498659	6.5855554378544e-12	3.56361573938241e-11	46.8185510252789	55.0307665294673	83.321338683246	5.76261638012727	2.18270093995771	3.41992408984321
ENSGALG00000007431	MAGI1	-1.06814768567349	8.12272391818719	0.000136269712118808	0.00031763535884565	10960.4327699977	9164.54157975735	8447.40427784676	5320.33297541492	5281.20320667643	4491.9594683092
ENSGALG00000007438	IFT46	-2.01700366320525	3.31937693598504	5.19056932902756e-07	1.69521105665828e-06	302.663281951124	342.778677149364	558.614196091574	128.97686672886	92.2018620820363	116.774500287738
ENSGALG00000007439	PRELID3B	1.12556819769563	6.9179220688244	1.26654034893335e-05	3.42399605542255e-05	2283.10518319577	1675.76280402317	1791.64562227094	4550.94056035199	4420.5965030166	5224.77218464872
ENSGALG00000007462	CTSZ	1.25895608881068	5.36256892159522	0.000150048771582275	0.000347130098987566	482.783536988354	754.305988917318	594.937917677674	1225.52217119008	2039.55164675148	1545.31798141827
ENSGALG00000007465	COX15	1.59442477401187	5.10054848405512	6.08907898462494e-08	2.19574373499403e-07	340.062856345812	519.068542886002	429.677384989431	1255.57584841272	1113.02265172169	2197.94095999611
ENSGALG00000007476	VAMP7	-1.03471558379809	5.45680497945192	0.000538059953277156	0.00114253748964376	1236.51137439978	1634.30993429022	1589.95376418852	736.654460592935	922.191147132134	744.68847056336
ENSGALG00000007484	GOT1	1.41818509651565	7.40955212998995	4.57415571114268e-08	1.66805133893003e-07	2014.86978519504	2290.52586724538	2698.2417074958	7719.98507724383	6059.17780932261	7446.8847056336
ENSGALG00000007485	TFRC	3.07565203116425	9.0037338135221	1.05963664901527e-17	9.56702578345097e-17	3893.01407164502	2370.73745983679	1980.20339922538	23108.5834221918	30790.9852089381	22131.3964100081
ENSGALG00000007489	CNNM1	3.6387869947022	4.17056599041172	4.24559651512969e-19	4.26263032400946e-18	75.1341930566124	73.6471765280092	52.4429179214343	1015.78360975834	460.535281666942	1542.4316384236
ENSGALG00000007492	YME1L1	1.08295177936998	8.54385115135237	1.81290046773629e-05	4.79834342518188e-05	6800.48525198149	6253.52661258704	5067.46515466608	15487.0173976392	11682.4172925798	16775.7956608069
ENSGALG00000007507	MASTL	3.0985965462671	4.02012326921483	8.34828841967351e-18	7.62032686236268e-17	76.9482920214723	66.883644321827	111.099849408547	691.681249891056	731.852280276163	1094.62452138879
ENSGALG00000007508	HPSE2	2.31632728067856	1.11062645691344	1.16890115880449e-06	3.63071102323747e-06	17.9546014716769	13.3767288643654	20.7663269922518	98.1593852980706	62.4283441180454	147.332313447146
ENSGALG00000007511	ITGB2	-5.27161585858024	1.99020008016619	7.53307916085669e-15	5.32859887522359e-14	132.540176742927	331.770542873572	114.567457009748	3.34418221609135	8.30653079690073	4.56555280456142
ENSGALG00000007513	Uncharacterised	1.55545247147609	5.91987570725362	1.24247824946491e-08	4.8524702657989e-08	649.290997737987	852.597691719135	821.294768511268	2082.05197203546	2073.99951964361	3827.16761008867
ENSGALG00000007522	Uncharacterised	-2.02819556622485	4.41067854631087	1.49502364962603e-07	5.1798585854206e-07	652.062667556707	941.645265940794	985.407401001763	270.654916554756	102.597722695296	388.76118262062
ENSGALG00000007525	Uncharacterised	2.13857207762919	2.08448568118223	1.75417735067452e-05	4.65220040031916e-05	31.95886963193	36.4965704074727	48.0194206790697	164.156356312474	254.157848422943	134.981125449637
ENSGALG00000007527	ADARB1	-1.35564171118048	5.4656131860761	9.79414789813359e-07	3.07091686933678e-06	1802.25196960062	1365.74008209016	1635.93435449831	554.882683577061	631.214393287243	982.247266733511
ENSGALG00000007531	ZFYVE27	-1.66691303464595	4.53080773856276	3.9833739572448e-07	1.32144794384537e-06	907.488489561405	1046.65298044571	701.118326248817	369.967809322832	291.548528659134	270.8787595034
ENSGALG00000007536	Uncharacterised	4.32511070972132	3.63639136517412	1.56431413876525e-12	8.94674360605585e-12	33.7965471049244	29.0727312419994	25.4012265667618	585.92370680377	156.94698105159	1506.20354576638
ENSGALG00000007537	INCENP	3.00695934985598	6.30671854126956	1.73858165351001e-26	3.09099309256076e-25	397.932324788437	551.233337263076	375.302530578538	3817.91479309981	3816.01593661943	4393.68064507723
ENSGALG00000007538	Uncharacterised	-9.49155613506539	0.774790252358151	1.26929021036396e-21	1.58966912748415e-20	95.3091931586035	65.4139300255932	90.1696678900881	0	0	0
ENSGALG00000007543	APCDD1L	2.0987312219603	0.0136401408470111	5.41743051105938e-05	0.00013445243425932	11.1147532919904	5.85231887815987	9.34484714651332	35.383034235351	40.3383146608909	54.5675234989428
ENSGALG00000007547	ABI1	-2.23210256679995	6.03032941393687	1.90645723632996e-15	1.42452632819404e-14	2654.42846158013	2901.26183438623	2597.09431067039	469.171294420179	603.431704455301	932.318540825499
ENSGALG00000007555	CCND1	2.1404033242189	5.8852420860229	3.44940274415233e-14	2.29665806203275e-13	665.723786687103	482.209296667893	504.135469075771	2250.03152961048	2164.07202936212	4115.46853147422
ENSGALG00000007557	RUBCN	1.08826402144934	4.92821642148882	0.000631858350943668	0.00132495451518828	531.617971001647	545.58356014509	393.778785975363	1420.93831191247	1107.20042408674	940.551248275693
ENSGALG00000007565	PPP2R2B	1.25918326825192	7.66952638590759	5.5806696548417e-06	1.57985958659905e-05	2578.77083010695	3892.84712641458	2609.40208055037	8267.65448373185	7829.94359242855	8318.43720991092
ENSGALG00000007575	Uncharacterised	-1.54244416037518	7.08870349092394	6.4477618715378e-08	2.31941051538394e-07	5988.06306282532	5047.95808938633	4302.684789042	1876.8151437783	2137.34025484246	1814.84322298542
ENSGALG00000007582	DPYSL3	-1.89547562768421	9.19146450999208	1.499198872627e-09	6.46209770804417e-09	23130.8229978806	20742.0722533829	25876.1190634447	8702.71980926147	3416.10131097398	10194.1946606996
ENSGALG00000007585	NIT1	1.58199572029862	3.79758824062272	1.23099815353053e-05	3.33538886828916e-05	126.893303828945	219.753671898092	177.140522756845	599.074461956352	582.019408725368	573.904758971898
ENSGALG00000007593	JAKMIP2	-5.55964414722015	6.37059652924357	8.09791578477988e-62	1.22048473924472e-59	3906.14610724257	4573.54252196941	3784.1180896169	91.673439478224	57.2837285048738	159.684700818362
ENSGALG00000007595	LRCH3	-1.07223555121603	6.11426353307692	2.20081807598358e-05	5.77208822261622e-05	2114.35920612376	2461.84806493145	2524.75070092247	1146.76065964533	998.585680030654	1786.91033694308
ENSGALG00000007606	PGAM1	3.14140582574368	11.4601391556889	1.17393616007741e-25	1.95847991083102e-24	14153.9462656559	15496.0853232298	13772.8892908211	154911.716750446	81908.6235555389	218716.231267119
ENSGALG00000007607	IQCG	-1.36642568196801	-0.0636542236755169	0.00720930359827695	0.0126661801064972	32.558150324532	30.8842998343264	33.7965471049244	12.3338859814543	16.566017326149	13.0205268178616
ENSGALG00000007608	ARHGEF9	-4.69286170946689	3.73425929360971	8.94974769936648e-18	8.12460668971237e-17	694.633637890823	789.840635189127	448.523641586572	41.4713178591966	29.0693547636673	10.0325466482741
ENSGALG00000007609	ARHGAP19	1.89084944505293	5.34046447642502	1.30950307424218e-12	7.5316302140824e-12	441.68590871608	405.256253676356	452.804473581406	1752.76322548136	1367.44231363034	2494.50114046483
ENSGALG00000007611	RPL35A	1.65984711462505	8.99941361995923	4.05390808957195e-09	1.66926367562846e-08	6123.37408286427	5906.66183917135	6592.27050369034	25839.8874856165	12555.780656234	31099.1229925175
ENSGALG00000007615	RAB11A	-1.13253221355113	6.8447125772068	3.16229148697961e-05	8.12661732063757e-05	3327.4613050109	4252.94376801317	4361.2443165573	1779.68802539597	2168.51338384799	2143.43742330923
ENSGALG00000007619	UBALD1	1.66613651943448	6.06246182821368	1.20049392049637e-10	5.77307863217672e-10	817.421502014164	800.262237023312	803.439777415947	3399.44772863162	2099.01290189712	3346.15924472723
ENSGALG00000007620	GFRA3	-5.08916556098961	2.45965105601817	1.1918342325401e-23	1.71631893878169e-22	286.763625029833	218.046433418644	296.760932296493	6.72305244348181	8.73080375983085	11.1147532919904
ENSGALG00000007631	MEGF11	-6.13494995660919	4.5527794088847	2.88945642907969e-55	2.64295590475062e-53	1202.1470889058	977.606875525025	1315.73454073999	18.5008289721815	17.6704184812256	20.031579719787
ENSGALG00000007638	HMOX2	-1.1571408878314	5.89527941828345	0.000228534909293696	0.000514610951097162	1661.55064007306	2320.34682681594	2231.51798078427	814.788582480596	1280.51058543861	961.453495226296
ENSGALG00000007645	Uncharacterised	-1.79060107704425	2.59125919101458	1.00686006607016e-05	2.76308401744022e-05	225.714989929652	280.075260597651	195.203473727167	93.5938324935092	57.6261638012727	79.6685843084565
ENSGALG00000007646	Uncharacterised	-1.28937753107409	2.29610862707129	0.00757283722688517	0.0132487191848276	173.061429682727	152.632503393051	195.177382395001	77.7953211317181	103.678294647991	47.0239562353442
ENSGALG00000007647	MYO3A	4.90295255662653	4.72406004343407	2.54870084857839e-12	1.43234827774132e-11	44.176046203064	42.0663174115527	42.5760427320803	1221.11770114183	2412.37422438598	272.226483447813
ENSGALG00000007652	SUCLG2	-1.83350355684512	5.61828806590577	1.32785960199009e-09	5.76100814563119e-09	2500.9444857644	1310.03488960161	1990.13088144803	529.835283588367	497.555322908233	864.76039536114
ENSGALG00000007661	MYCBPAP	3.08859069136725	7.03018889772103	7.68390062936376e-29	1.58740769544006e-27	623.983708271365	659.511250163597	795.864649576874	6450.47890433642	4691.28163223173	9622.64726418241
ENSGALG00000007665	POLE	1.27907534042212	5.80474843824623	9.29748333421026e-06	2.55994439405503e-05	640.410894381494	976.017368635836	849.192821648425	1803.69892697983	2385.69212737378	2536.7286936412
ENSGALG00000007667	GPR158	-1.21183481720218	5.30422423469166	0.000506627380499855	0.00108011556784594	1335.27482560179	1546.58101254518	1289.86563308515	706.10375407632	809.667028270381	426.383232551647
ENSGALG00000007673	LRRC59	-1.16432175485005	5.69553678902013	1.34413770802279e-05	3.61755243942904e-05	1721.10142553134	2017.90701899091	1680.03770913548	795.915367429742	924.101551155206	1000.99745240009
ENSGALG00000007680	ENKUR	-1.7832141620652	1.1045227655144	0.00105429090885137	0.00212702469183081	101.495593708034	68.3984817968643	75.2440998620554	12.4597961953511	39.9485870399125	24.9713376472182
ENSGALG00000007683	Uncharacterised	-1.43687999548922	6.62926561707563	8.93698948282500e-09	3.54671728039222e-08	4097.58364209388	3227.06517287127	3614.55275656997	1414.99359217263	1231.49510107564	2029.90846349262
ENSGALG00000007687	MAP2K1	1.13258812591727	6.62655785480397	4.54990299249932e-06	1.30391882864128e-05	1693.04697073243	1585.49953482114	1404.17458579136	4273.9119539964	3059.17021208367	4422.57911620719
ENSGALG00000007690	TFAP2C	-7.32247643258909	3.68007047260636	1.21336843258002e-34	3.59216641100642e-33	729.298812159065	619.509755530923	574.188941335763	1.14138820114036	0	13.0962056397463
ENSGALG00000007694	PRTFDC1	-1.19934949659267	2.94512683031053	0.00170876661746044	0.00332844347883357	321.380736127291	278.438958105039	206.201618722036	138.979349254469	96.7280486106456	170.912420028724
ENSGALG00000007699	Uncharacterised	1.22310692926555	9.27645747408837	5.59036319927766e-06	1.58192846409259e-05	7153.61000335679	10152.6196416919	10839.3684352725	25302.0860990977	17766.5013817173	33573.929189349
ENSGALG00000007706	FGF8	-4.42093789451826	0.218168335257877	1.33540114461703e-12	7.66728371474273e-12	49.0796926490353	41.2987507242454	69.8464300786468	2.56494306738241	2.50813666206851	3.11494904883777
ENSGALG00000007711	RPL4	1.74972876775132	11.5702100928714	2.30668317854096e-11	1.19041007770384e-10	30720.1860123794	39020.7016111664	35771.3934846097	127851.682202601	96698.7427812761	190956.318133703
ENSGALG00000007712	MYO1B	-2.54953930083884	3.38947556741148	1.17417329723595e-09	5.12440290925978e-09	331.910084947067	447.514346683027	568.411324167897	62.4283441180454	62.2069767887948	148.76669790818
ENSGALG00000007714	NMUR1	6.17802415815916	2.95350675373537	1.24043679077955e-14	8.61807918078009e-14	0	14.2542922312276	1.16539817603187	517.142219365263	201.001010223941	645.016866977142
ENSGALG00000007720	AIFM3	-4.73194626557247	2.75428936444949	2.53953160663803e-20	2.82565500829196e-19	292.403509681595	259.17412174708	424.67138699155	10.2724938102632	17.2878491403818	13.0962056397463
ENSGALG00000007721	ARHGAP21	-1.41410425657145	6.73309564065985	1.05584502736487e-07	3.72240100955349e-07	4538.15438551775	3038.76069695632	4127.80545862632	1625.73045556446	1216.64975288489	2279.4839840781
ENSGALG00000007728	Uncharacterised	1.9498313841979	3.28008005464611	5.01857776058523e-07	1.64511608597731e-06	126.69409032658	100.845786652227	72.0291310186045	370.206782725528	353.64726935166	624.028126117167
ENSGALG00000007732	RTN4R	-3.15898138326525	2.58209374888899	5.01850532939105e-10	2.26936366122446e-09	270.372376839395	185.889281577633	351.199567314359	17.026842761819	42.5760427320803	41.5750190077471
ENSGALG00000007740	Uncharacterised	-3.0907909129427	1.30070094297954	9.18762756431302e-11	4.47504606630494e-10	103.866326303772	97.9644784621635	124.41395357759	17.9546014716769	10.8685922022969	14.5364288945763
ENSGALG00000007748	SLC16A2	-1.79823364795384	7.71671323253369	3.99093809671722e-10	1.82272079809781e-09	8726.00256088315	9020.18188248671	6989.78938406132	3346.3354998821	2290.61114095765	2330.82963348957
ENSGALG00000007762	CREBBP	-1.71325256256457	7.2484108210684	5.87992602516805e-07	1.90440681005626e-06	6299.20930851666	6794.27136626583	4546.79896787755	1698.56897650781	2597.09431067039	1510.19728043791
ENSGALG00000007766	KIAA1217	-2.49666689358837	0.488811921135425	0.0009377848090812	0.00191116163534787	47.6545965793018	82.0269916193947	43.3727516433335	2.88130819006363	24.0097103395348	4.27490511230402
ENSGALG00000007768	AURKA	4.82807183206786	5.21102377604999	2.93318527757134e-33	7.95559025284841e-32	47.5735602141809	65.1596681495194	77.12158192118	1191.29437213095	2373.33965649939	2506.77147664456
ENSGALG00000007771	FAM210B	-1.24791584056981	5.95414601750133	1.95399835281264e-06	5.90070130996221e-06	2496.21599589396	1967.93349381346	2134.68151927864	969.548479470551	1020.81162146189	1143.18630092346
ENSGALG00000007777	SLC39A10	1.2264085374155	5.55260129225293	3.83134246512592e-05	9.71793748612833e-05	838.240476703139	721.136869912332	565.176096659184	1830.48869402681	2004.48486277482	1660.66964821724
ENSGALG00000007778	PES1	1.44921675278949	7.6355212535685	1.03568882644118e-07	3.65814671240731e-07	3318.72547100518	2560.03588818878	2190.5791397839	9761.81446301903	6180.10652749703	9327.94176940273
ENSGALG00000007780	EIF4E3	-1.97548751308344	4.82535283578976	8.79944001821076e-09	3.49631434875762e-08	1285.43564082039	979.311076578426	1150.60240389874	486.74230961057	210.325331525358	290.943852799948
ENSGALG00000007786	DOK5	-3.28702016217775	3.98425152114823	0.00013258956827807	0.00030938343491767	453.136690280378	716.438281232688	995.290511394391	4.80218031677272	174.616075196617	43.604032145501
ENSGALG00000007788	ABCB7	1.30646722786112	6.03384661316942	6.14079117753615e-07	1.98356827539362e-06	1163.37960099746	813.086952360224	876.175740615934	2634.20857896714	2309.02833090694	3107.97110101531
ENSGALG00000007794	DRD2	-3.96759946296255	0.120981029170022	1.42307162608884e-08	5.51393484569569e-08	57.6261638012727	44.7453692691331	44.4590131679618	9.19650109425122	0	1.14138820114036
ENSGALG00000007803	Uncharacterised	-4.45119551673476	1.49906126147126	5.41990823950762e-14	3.55159303263782e-13	126.242878657449	182.743677531816	92.4524442923689	5.76261638012727	9.82215422980971	4.27490511230402
ENSGALG00000007804	GXYLT2	1.11892085948365	4.71996284615428	0.000157217142562578	0.000362764607134215	519.482823709936	371.061763747989	363.679815999935	1179.5273731599	757.881765557197	1196.70333493976
ENSGALG00000007809	TSHZ2	-6.23175570808935	1.84086974519143	2.41733403336612e-24	3.62682141227769e-23	166.507460749633	210.940620619631	150.236847898403	1.66964873459139	3.5635730578069	2.33079635206375
ENSGALG00000007819	PDZRN3	5.36183080407107	5.77417362578424	5.10069640820764e-50	3.43403738386081e-48	48.0218031677272	87.3080375983085	60.703652594717	2309.9938657651	2485.72934097254	4662.57080165836
ENSGALG00000007820	BTRC	-1.08141236232484	5.75241818514159	0.000390638102305557	0.000848932189231296	1486.82219815363	2141.70740774195	1906.59141598815	690.697614961441	1130.90678279844	1099.73372661631
ENSGALG00000007821	DNAJA3	1.04500411825065	6.46437550542414	8.00287644986859e-05	0.000193902357242614	1339.80830837959	1657.76136389788	1362.83974980252	2571.67612417425	3313.26747161378	4390.92040978695
ENSGALG00000007825	KIAA1841	-1.37634947046721	4.06460506020009	4.00194661124549e-05	0.000101177693299559	631.671160621624	554.409379848453	636.002656103238	178.652414601278	253.01368710429	377.589009034327
ENSGALG00000007837	KAZALD1	4.19802066702792	2.5327401804077	6.58061650594855e-14	4.27836846658802e-13	22.918359869556	16.2446394267553	5.01627332413703	335.376180924867	168.925453768773	466.771926790309
ENSGALG00000007839	NCAM1	-1.81478894416514	9.83536617127443	4.40803087598144e-11	2.22042208538328e-10	39871.7677965785	30810.9281735287	37011.7959100821	11031.3909516867	7579.3704306776	17602.8630478801
ENSGALG00000007843	ATRX	-1.13942652626656	7.9570168329703	4.62803584165882e-05	0.000115967578628228	9651.82769389598	7091.10344748041	9124.56234324287	3208.05749212389	3836.01796772371	6640.12446438018
ENSGALG00000007845	REL	1.52008713991793	4.6610008699595	6.62457571514079e-07	2.12894954470347e-06	297.63221723213	337.452813624092	351.54756595123	899.928591363208	1142.64394206786	1121.73510146857
ENSGALG00000007848	PTS	-2.67412935282419	2.9488451007059	2.09568600262081e-10	9.87041315794026e-10	348.874293469831	372.092553571756	282.368202626236	62.2069767887948	62.4136146396386	49.3266876873474
ENSGALG00000007861	MAGT1	-1.85083282871174	4.23068395551918	1.35864919571821e-08	5.28438835273039e-08	787.043793006344	828.647834027899	603.153847786654	225.909547285623	230.844876064417	232.420664018349
ENSGALG00000007862	CNTN3	2.88809839600992	4.99115354472874	5.98103611214913e-16	4.65530997391044e-15	188.532257145087	205.418614844248	177.279480520115	897.43619484287	1807.91939799403	2080.2357442169
ENSGALG00000007867	SLC9A5	-4.48648087372361	1.28217968457624	9.51328856021959e-15	6.68652602936897e-14	113.647949400543	124.797330523656	107.168951500861	4.17412183647846	1.18785768593563	12.8193799363506
ENSGALG00000007868	BCO2	-3.65293347843989	5.42949076957048	1.72404107598331e-19	1.77473646402952e-18	2287.81390311203	2336.62334294391	1414.87292044397	219.775829860243	196.309481253913	104.353045911962
ENSGALG00000007892	SPAG6	-3.55116705251237	0.548099050154443	1.42243815380854e-09	6.15523563913951e-09	47.6545965793018	69.5671954240436	78.7557858786846	2.88130819006363	8.73080375983085	6.83984817968643
ENSGALG00000007900	COMMD3	1.98971818753451	5.58988660897597	5.69141360149426e-14	3.72215081837369e-13	533.670379819661	487.339182802658	443.104143632104	2441.0817379392	1756.59644155501	2445.27021730067
ENSGALG00000007902	ATP7A	-1.09183485323398	5.25023174185999	0.000465891075706455	0.000998725284805998	1556.10122750293	1264.99425930455	1095.28956989195	598.680273711559	804.124741461993	617.575290928533
ENSGALG00000007904	DLAT	1.78424774214588	6.63169165188491	6.26601545298015e-10	2.80669243339668e-09	1303.19336299039	1152.81741287374	919.976452759854	4007.83183234682	4785.12491078688	4078.11130058228
ENSGALG00000007909	IQCH	-2.0056740236737	2.44126531054411	0.000141193165528796	0.000328188740695482	271.746267024735	188.095824941377	191.45443187123	42.5709703341162	92.4524442923689	36.4965704074727
ENSGALG00000007912	ATP9A	-2.91873053018261	5.19239949643159	8.7835840835982e-18	7.99016980114972e-17	1152.05762686806	1759.21723287067	1968.35751931784	194.699200135814	274.995887614073	248.391588525359
ENSGALG00000007920	PRR5L	-5.26077075185997	2.95334704471129	7.38170720718414e-20	7.95317487318305e-19	436.238456255257	428.675806003442	270.483095003805	14.2542922312276	13.9847781123825	3.52396742327266
ENSGALG00000007927	CNTN6	3.37306710099459	0.674889541350205	8.4814395515069e-06	2.34940126924887e-05	11.8785768593563	1.16539817603187	7.04793484654532	57.4288600639832	124.195794262679	39.2367452628976
ENSGALG00000007928	MLLT10	-1.21670280966533	6.38762262345954	2.644325024247e-06	7.8337464365843e-06	2962.31654544472	3248.39082044545	2647.92222666848	1525.70795703044	946.463991864109	1996.47678300654
ENSGALG00000007929	DIXDC1	-5.79531311102462	8.01219184438319	1.07153811184935e-49	7.00089161451132e-48	12442.4492007581	15597.5809169378	10361.5150112025	387.925137066597	181.705361182203	210.015429009826
ENSGALG00000007934	KCTD2	-1.16898269462205	7.13243576895366	3.43638913364526e-06	1.00080871935742e-05	5692.48405140972	4737.44984545531	4270.52068994866	2400.58740030431	2197.17228719519	2842.89074752945
ENSGALG00000007936	PGK2	2.5108319473091	10.0557624925383	1.64217940043221e-19	1.69627923582028e-18	9691.76031531071	7638.36193938202	6728.70064676652	44164.9424368104	41935.5207281533	73432.351308566
ENSGALG00000007941	C5H11orf74	1.4593907100942	3.03376446188256	0.000326485271120349	0.000718224274484855	88.2568897170702	132.401031332281	106.608403032354	348.140799923255	359.092029433537	287.599670583856
ENSGALG00000007944	HECW2	-3.48761101043604	5.72053838391189	8.91451056240817e-31	2.12267780231992e-29	2524.14704590821	2831.78412702922	1969.85436594017	291.390575484355	164.156356312474	300.976399448222
ENSGALG00000007945	CRYAB	-2.28673337573823	0.276724001183233	1.53061087117955e-05	4.08296298963281e-05	36.1273434569881	54.6214950607262	54.1156565987534	7.01105290192545	6.67859493836554	21.3814383468414
ENSGALG00000007948	LRRC4C	-6.33070521634972	5.3174040882155	9.57440146644771e-56	9.13563213305726e-54	2331.76463749165	2012.64265000705	1612.21509614724	29.8188311870682	33.0521065376486	18.3661360805052
ENSGALG00000007956	PLXDC2	-4.25660488417354	2.11180747520977	4.63923607129866e-14	3.05664123266936e-13	236.57582973447	201.74713498236	175.599783657179	10.0157898598935	18.3661360805052	5.93928842967816
ENSGALG00000007961	ARMC7	-1.39278474465237	3.74267213148129	3.94329376934027e-05	9.97824672211759e-05	526.179960725704	405.304018735618	529.304977939746	242.814610378868	164.700974142499	227.391280565157
ENSGALG00000007963	NFATC2	3.63174187986489	0.45885077213182	2.41441778014347e-06	7.1928173894975e-06	0.854981022460803	13.3767288643654	0	61.6349628615792	57.6261638012727	88.3993880682874
ENSGALG00000007964	CASTOR1	-3.29740063267406	1.84166290941835	1.08458139598621e-09	4.75373531228191e-09	130.205268178616	222.89810606795	131.852203138855	24.4733616966694	19.3818208279996	9.9396103956894
ENSGALG00000007970	PIAS1	-1.20381418232967	5.46540887443487	6.28953774453852e-06	1.76658490270678e-05	1529.43998297935	1742.89978314132	1385.90923942061	743.209670055601	720.749001934457	818.488597388358
ENSGALG00000007972	TRPC5	-4.5453648919812	1.44398943126117	1.53004338600237e-11	8.00511456747514e-11	178.912987122409	108.17053048685	100.178924075483	11.8785768593563	5.82699088015937	0
ENSGALG00000007976	Uncharacterised	-2.35167801094285	1.29614054465435	2.90086286599802e-06	8.51763209912149e-06	90.1696678900881	145.025845566536	68.755079608668	20.5195445390593	12.5406833103426	37.3793885860533
ENSGALG00000007979	CALML4	-3.09151618551443	3.76679979116762	5.69134908215227e-05	0.000140855314194039	686.581742470795	674.765543922455	476.616593997627	50.8024531335236	154.24316384236	8.34824367295693
ENSGALG00000007981	CLN6	-2.0752021915032	5.73751636876273	3.16192068936166e-05	8.12661732063757e-05	1834.28394552611	2327.90525583143	2358.10802355598	385.134861405172	973.48461922114	228.279932997034
ENSGALG00000007989	ADNP	-1.24525864980995	8.74956813194491	7.58295920237772e-06	2.11198630619773e-05	16240.013395262	16417.1851198919	13179.5324612333	5114.92669951172	6990.98398194158	10132.1030615229
ENSGALG00000007992	GGA3	-1.82271256054775	6.63427425803929	8.10632923984703e-09	3.23838086470154e-08	4810.82362803931	4140.65971944125	2772.48137025976	1280.00093873378	1348.12531514167	1015.14643063156
ENSGALG00000007993	DCX	-5.80599759181817	3.65221999537999	6.27414481673058e-25	9.90642651241639e-24	484.906421333246	657.25424930477	719.074566718424	6.72305244348181	21.8270093995771	6.83984817968643
ENSGALG00000007994	PARD6B	-1.01325938188457	4.68180082719191	0.00153331722448265	0.00301503133407166	706.555468366168	934.323377194804	950.498457703894	329.755625081799	514.342378010129	611.834042416734
ENSGALG00000007996	ANKRD44	-3.03639135581854	6.87824690766875	2.46226994885753e-18	2.35451235268187e-17	4776.86502966595	5603.12470455838	5486.69461275806	876.586896539074	770.872006243467	457.721596597133
ENSGALG00000008003	ZC3HC1	1.1024884943988	4.82996703845707	9.65917697789175e-05	0.000230786640709383	455.013275891559	497.784756036707	411.568413076777	1282.88630081048	863.560048439619	1198.1489239127
ENSGALG00000008005	RIPOR3	-1.09076888570736	5.83284957012904	5.17800550313057e-05	0.00012899302589786	2130.97177152905	1707.65532064438	2027.72917322072	981.518213785002	700.606174271138	1567.85768791501
ENSGALG00000008014	CEBPB	7.10860415758482	3.55642932102528	6.69793274291591e-22	8.56650742230412e-21	4.75143074374253	5.82699088015937	1.76198371163633	727.800361195479	156.246321814339	1296.48224241021
ENSGALG00000008018	SNAI1	2.00083362387787	1.60299194337774	5.35414466363702e-05	0.000133056062720288	28.2143737412065	24.2453210666623	36.3410722364407	151.804630751667	57.6261638012727	220.452794935729
ENSGALG00000008021	RNF114	-1.07334967444383	5.61752641792966	0.000100137624281631	0.000238485421233124	1769.79006824318	1255.57584841272	2005.10377385935	896.191197368511	810.512507352711	1008.31825458494
ENSGALG00000008026	SPATA2	-1.05378349604168	5.08485929801309	0.000399568202700072	0.000866351654799911	1441.67397084207	1037.09198024495	983.189571530858	579.380523083826	658.580992057986	621.40213299039
ENSGALG00000008032	Uncharacterised	-8.23423500148685	2.78312914787433	4.33267541650146e-31	1.0429087849194e-29	460.549898331078	289.838566614212	280.911306151674	0	3.42416460342107	0
ENSGALG00000008034	CASKIN2	-1.01558594292942	4.04181222053917	0.0188477241729826	0.0304776110346584	591.959019121058	644.015287991152	426.595251688099	281.522271566745	419.543343371475	171.793411884542
ENSGALG00000008040	Uncharacterised	2.95091110085522	2.24923934622311	0.000963642255669518	0.00195964232397191	11.044011550766	56.0884232154036	14.1920142440268	179.36651057628	420.708741547507	29.9537230978176
ENSGALG00000008043	CORO2B	-2.31075291211365	9.01880456410731	2.37630542685682e-15	1.76466623048164e-14	26786.1059351611	19272.127227289	19310.9802068195	4696.30484929775	5217.28546741257	4732.06848414784
ENSGALG00000008045	SLC9A8	-1.52080521121625	6.38069302834732	4.57440634160119e-09	1.86792953536504e-08	3612.20003427644	3263.13790523678	2476.88002206895	1142.0382267952	1057.00604390562	1540.87407153948
ENSGALG00000008050	HBP1	-1.27524938862363	5.37786122627003	3.38588206662368e-05	8.66929610996716e-05	1490.63822004433	1636.72251182352	1322.08426150594	439.117617197534	586.801696852202	1136.26322163108
ENSGALG00000008051	MTMR3	-1.91732294280672	7.17294820082152	4.70669772582045e-12	2.58917179334536e-11	5644.48274433466	6757.64211010908	4869.97190393674	1295.03456318138	1581.35580045998	2396.91522239475
ENSGALG00000008053	PRDM11	-2.18291427479697	6.13135904803586	2.64249594515561e-12	1.48380286708716e-11	3000.73425038039	3328.28799452528	2363.63315191553	748.666422405496	787.4375216864	563.494703411393
ENSGALG00000008054	Uncharacterised	-1.06331905569503	7.99265273506961	0.000102490876472184	0.000243608690797595	10872.8293717291	7641.04608411276	7567.68288953546	4446.15131845707	4687.2314640002	4863.95603597209
ENSGALG00000008055	SYT13	-5.1743578329362	0.887111796977263	1.4998527639626e-14	1.03337907576291e-13	56.851097673553	126.674594652736	81.0385622809653	2.88130819006363	3.27405140993657	1.70996204492161
ENSGALG00000008057	LLGL2	-2.45372442619064	6.42732591500462	2.6085020080144e-21	3.17983107833593e-20	4089.5939246859	3477.73898540681	3445.39343372325	742.978508518438	697.261992055047	836.882977787748
ENSGALG00000008060	PRKAR2B	-4.2693618474938	4.80261912863059	5.85618123862094e-20	6.3768909497397e-19	1775.6272146556	1077.27608830061	1159.59518342968	71.6438281232688	26.2519286262282	158.4719504535
ENSGALG00000008063	NOX5	-1.20653179529979	1.79277445535457	0.0255131571937115	0.0401925411403011	140.223665249763	142.96691156723	76.0933109990115	29.2615943907993	33.2261231876029	128.97686672886
ENSGALG00000008072	CHRDL1	-8.57995558645533	4.6582411660968	1.54566183381874e-69	3.79631720406259e-67	1386.82382947793	1237.79355742452	1182.81363708704	1.00157898598935	0.834824367295693	9.50286148748506
ENSGALG00000008076	TMEM164	1.15688227352188	5.18026795560344	2.96513969809054e-05	7.65109879684336e-05	541.757519006799	476.587204472179	676.843203276231	1546.30206200082	1036.78294647991	1797.17010921261
ENSGALG00000008080	C1QTNF4	-9.02088704766565	5.17892154297444	1.5508742074691e-81	8.22769784546504e-79	2212.11551361843	1643.59111600852	1612.04585324798	7.12714611561379	3.49619452809562	0.880991855818165
ENSGALG00000008084	NDUFS3	1.0148678296484	6.68439621866013	9.35736086683788e-05	0.000224181136518914	1838.9983217783	1530.28285355615	1781.39906313856	3907.15962434446	2592.96448482042	5767.04906521749
ENSGALG00000008085	NEFH	1.22016686026044	3.79081472550226	0.00159643613380809	0.00312662912621038	206.905407435514	154.668427494225	263.732352801598	376.658106376318	644.452598510899	602.425459428329
ENSGALG00000008091	PTPMT1	-1.83434697796072	4.90341965255159	9.13477449146069e-08	3.23942551016693e-07	795.350323803245	1419.8869222186	1315.79740679573	510.752019950105	258.204268783163	359.49958822982
ENSGALG00000008094	HSPD1	2.21496599110555	9.43701745929725	1.42230994744402e-15	1.07304305079352e-14	7099.09062483238	6147.69181600263	5353.72866746728	31465.162242749	32842.0859987542	32170.2986070561
ENSGALG00000008095	KIF23	3.73140344893521	5.13834387469261	8.81996240855905e-36	2.7459897048056e-34	103.831634961259	134.683807734562	133.500612806282	1874.94010742368	1519.30127691285	2291.6008635766
ENSGALG00000008097	CELF1	-1.16662395740476	7.09701143637371	0.000130217862069487	0.000304223974745042	3899.31646396252	4940.30919145671	5488.93585928397	1967.93349381346	2875.70848839429	2161.39202478091
ENSGALG00000008098	NAMPTP1	2.18224726020922	7.29348273606959	2.88842861262604e-14	1.93970778173464e-13	1587.60081272506	1436.21721849218	1262.80697017461	5506.19601879441	5608.98492060722	11869.2959036586
ENSGALG00000008100	RAPSN	-2.58573171150328	0.736457920127634	7.29610892818663e-07	2.32896011346665e-06	61.0963181453504	55.9332326088114	91.4650418170437	16.3155744644462	12.3338859814543	9.9396103956894
ENSGALG00000008103	CEP41	-1.62749690338008	6.52346828371414	2.55200723064452e-07	8.64553560665089e-07	3001.53925277249	3936.085716693	3576.63855896797	1233.87041486303	1510.95497651012	956.791902522169
ENSGALG00000008113	PLCL1	-3.90294707835869	3.43050642023692	9.52805241021543e-15	6.69335588541776e-14	617.798228019492	423.455022623072	481.178467740627	53.476173028964	39.3291270331969	17.5569566344796
ENSGALG00000008114	SFXN2	1.18851092614089	4.82274663563421	2.33515583094619e-05	6.11112308323587e-05	504.493584904038	380.3326810884	417.987230001902	1071.29122114339	884.536196156163	1483.75406359639
ENSGALG00000008120	TLE3	-1.22472000543657	7.32756409692779	2.57839734987632e-06	7.65211099830155e-06	5459.39392456017	6858.36826594758	4712.42543677136	2945.43788058929	2027.19586764245	3459.51217807335
ENSGALG00000008122	SLC39A13	-1.69664927063216	4.99758333944205	2.78974201272904e-08	1.0428508544201e-07	1004.09071038143	1271.93752827542	1411.89720481062	387.055733531881	461.641248801056	417.230738960872
ENSGALG00000008123	RINT1	-1.94294408742271	3.78449895020187	5.31028915935524e-08	1.92537903555299e-07	640.31878083974	458.128002220118	550.040636869344	128.24715336912	171.389338574682	182.743677531816
ENSGALG00000008124	BORCS7	-1.15916422083293	5.32731986093602	3.69244805674613e-05	9.40340602469738e-05	1474.13138824612	1619.90346468431	1099.47783606107	819.465657066837	574.906337957887	738.819565056688
ENSGALG00000008127	SPI1	-5.74669185998461	0.899315647706788	3.06819595907951e-15	2.24825872957301e-14	67.3684704596726	135.213163108562	66.7859493836554	0	3.49619452809562	1.76198371163633
ENSGALG00000008132	PUS7	1.30710951579618	6.2640654248338	4.17585523550781e-06	1.20243960027226e-05	1294.35815374978	1230.94057378091	821.467177418962	3350.94653202442	2991.57711787382	2906.39213234413
ENSGALG00000008135	SATB2	4.45290787142755	4.49087864308534	2.2300103720144e-36	7.19625974793845e-35	46.3264497514897	61.7661033296893	39.6446335118174	1323.07258378177	979.544248297585	1410.01835636243
ENSGALG00000008136	C7H2ORF69	-1.0956702102661	5.00361497039707	0.00019324616491188	0.00043970215907124	983.189571530858	1182.64232220874	1135.68126013465	496.545444754299	634.074623057716	590.791886520415
ENSGALG00000008139	EML6	-4.70013749560109	5.68896090246864	1.12128613389026e-46	6.27494430117574e-45	3010.03137616089	2697.89677751379	1809.55727185051	108.231313197507	98.1547406269564	121.884357625171
ENSGALG00000008141	Uncharacterised	-4.75414933322796	0.172117544312542	2.72542475419632e-10	1.26877179764499e-09	45.138592065554	79.2470759701674	32.5966986652721	0	0	6.67859493836554
ENSGALG00000008145	TYW5	-1.40778527391064	3.79429418552054	8.20568658505262e-05	0.000198453722059724	467.501645685588	544.03882015852	506.948206573865	162.98349332636	246.281457582082	228.360008805572
ENSGALG00000008151	WSB2	-1.03647326570512	6.45786307945101	0.0004953370944928	0.00105756251891813	2812.84700029558	3493.86373174356	2635.04664075213	1966.93845719142	1599.52164062499	1243.88830727058
ENSGALG00000008155	KCTD18	-1.27209103679775	1.82703838766284	0.0027858087741482	0.00524757588006357	127.688004987526	132.522058481424	112.866149793083	62.2989809767555	59.3521864592985	49.9426752944363
ENSGALG00000008162	FBXO18	-1.05642346294177	4.61541102886303	0.000779947334768459	0.0016115347407749	802.583580650348	906.713348317889	790.245819945598	323.077030143433	496.524512721094	532.586966446567
ENSGALG00000008164	ADAMTS7	-2.01899558939805	1.73774900890329	5.40086309771632e-05	0.000134116546086897	120.552324166973	129.58706087354	147.440921644988	28.5347050285089	51.8635474211454	25.1010608095137
ENSGALG00000008165	GPR75	-3.865025864025	3.14057093332457	1.00917934140665e-20	1.17307148160179e-19	417.987230001902	366.786858635685	457.316918050492	31.1494904883777	26.2519286262282	40.3383146608909
ENSGALG00000008167	KMT2E	-2.80169542105599	8.49523542453868	1.60029277349398e-26	2.85277998049068e-25	17125.3885699099	14323.9434488697	16323.3289794738	2305.02883655433	2206.32421706627	3384.91129973705
ENSGALG00000008168	ANKRD16	-1.5654629660478	3.60194430974548	5.26337794399736e-05	0.000130947630221791	491.773081977352	579.202893487841	296.894255410721	188.852597518099	165.260532688243	162.79075162266
ENSGALG00000008177	NOS1	-3.26349772099838	1.67252305162423	3.95838355061194e-09	1.63195651326597e-08	159.026470177709	173.89747523675	96.563420513971	10.2724938102632	24.9713376472182	13.0962056397463
ENSGALG00000008182	CHAC2	1.50519249395314	1.75021907885277	0.000799696067642067	0.00164951305523122	41.0899752410528	26.8922097739272	61.115626318816	123.972248256816	117.046377563197	182.743677531816
ENSGALG00000008187	EIF3J	1.18557859388158	6.71881239023058	2.88241732414791e-06	8.46534565327142e-06	1878.5863647853	1554.45058625547	1434.228263014	4282.22695779795	3739.76274688628	4517.72623663555
ENSGALG00000008188	TRIM36	-6.41387708962872	0.343694699789273	2.5320560935571e-14	1.71165443266298e-13	86.1432900959748	65.1026340893078	30.8885015899406	1.18785768593563	0	0.880991855818165
ENSGALG00000008193	RELN	-9.2166150533284	11.1509882374926	2.15289035041412e-28	4.33948096011285e-27	94864.4169238634	126426.437045179	122360.23932685	85.4788096385545	426.718033761733	64.1235766845602
ENSGALG00000008195	NPHP1	-1.14689398471139	4.63019037507924	0.000379889520865648	0.000826928395739552	882.578260650175	911.341373656926	782.32076796653	422.985642394338	490.773703134782	364.818248508218
ENSGALG00000008198	TPCN3	-1.07217092408047	3.85164540434184	0.000871112761410602	0.00178378393617243	476.545965793018	511.889960359007	486.231373685792	219.939858508191	243.371154805285	340.2824469394
ENSGALG00000008201	FBXO21	-1.47747481709012	5.50022860377827	1.02666445532665e-07	3.62723779195453e-07	1700.68111820992	1357.4244212228	1975.40733171096	695.742711091029	632.552152477442	711.23434386933
ENSGALG00000008206	TESC	-1.55598864059293	0.448601867960264	0.000778622528337519	0.00160929883019176	52.3848225589851	52.153842370109	42.6383232551647	18.6896942930266	12.5552702125439	26.8922097739272
ENSGALG00000008217	RNFT2	-1.71221142263789	4.32915786749009	6.72317255566731e-08	2.41586121933935e-07	856.708968512254	856.710118933403	612.166412081935	224.060208478121	246.080974858184	342.416460342107
ENSGALG00000008218	DDB2	-1.49036024207345	5.2676560891012	4.64310058843953e-08	1.69226279484676e-07	1647.87302090907	1257.17537825252	1390.44105424144	528.833704602377	442.456914666717	810.118941808101
ENSGALG00000008226	NIF3L1	1.21186483242409	5.12118096518815	2.10146235055893e-05	5.53119570459676e-05	534.535958671035	609.50324606467	441.3769197649	1637.8269129786	927.462141026139	1693.85864124296
ENSGALG00000008228	PPIL3	-1.79787178353576	3.45897502261482	6.15986230769027e-07	1.98875982928179e-06	410.134958096973	490.796926490353	385.134861405172	146.240962977167	130.812096436503	138.783561967791
ENSGALG00000008229	ALDH7A1	-1.00745939646267	6.48902790043826	0.00438225106789036	0.00799144725882439	3265.48261540545	3974.698411663	1841.62912238057	1009.10698370557	1357.07946894366	3004.13374540142
ENSGALG00000008231	PACSIN3	-1.12416783696113	2.7422631524033	0.00653723727113145	0.0115805232973175	157.781805418886	298.152279169844	231.914237030343	136.553737651816	76.2036797002854	155.244742828349
ENSGALG00000008233	BUB1	4.52586316132524	5.64772605721586	5.41230347161025e-38	1.89402060538171e-36	73.464544322021	129.476487766984	111.87822489906	1914.39530269287	2643.93636525338	3787.97172501172
ENSGALG00000008234	ORC2	1.25208084574564	4.91997905067131	5.91929517575006e-06	1.66682827847077e-05	397.957683714871	469.318990024891	483.948597283511	1146.76065964533	1112.08612890846	1400.4589147908
ENSGALG00000008237	GRAMD2B	-2.16168285777602	1.57774082486787	6.74429141143986e-06	1.88911376958663e-05	137.434729507634	113.75331897289	111.175267444818	15.0268386113225	27.3207267765195	52.4429179214343
ENSGALG00000008238	MED13L	-2.39135906689368	8.1082059296121	2.62330135306967e-18	2.49769173336418e-17	13941.6583798693	10117.3104722158	11028.5499345949	2080.27955389988	2348.36094520278	3223.84575962931
ENSGALG00000008239	NDUFB3	1.14377252208233	5.71216958437982	1.68190781874717e-05	4.47395575612589e-05	785.727559641478	693.917809838955	988.477164831187	2253.10030905106	1617.37433068905	2385.69212737378
ENSGALG00000008240	CFLAR	-1.85689477571553	4.96857697704982	9.09181752662144e-11	4.43979292546319e-10	1240.95636364081	1039.35633728314	1426.61708080869	341.461665577339	355.920709750538	470.474892062632
ENSGALG00000008253	TBX5	-7.66493889839344	3.0049848886401	1.97178487149056e-27	3.75204917511898e-26	601.05598908343	326.311489288925	274.869459015267	1.1044011550766	5.00789492994675	0
ENSGALG00000008255	C11orf49	-1.09314769171192	5.16243043936242	0.000362995628325261	0.000793279126458713	989.041890409017	1333.19819290257	1361.67612396045	610.83733629349	720.291310186045	574.54724709366
ENSGALG00000008256	BLM	1.35203627829664	4.49891920760718	3.68133363157204e-06	1.0674579789143e-05	310.456588534165	365.244224364914	284.289074752945	929.830600421986	761.788091012576	1121.13708794463
ENSGALG00000008257	MERTK	-2.57188676428796	1.54207344573899	3.0801916199344e-07	1.03476650089134e-06	101.604906267047	190.300007337977	78.4734905257951	21.3814383468414	18.64637081651	31.7157068094539
ENSGALG00000008263	CNTN4	-2.28140647821378	4.80881163102065	1.02699942705178e-11	5.46812260176142e-11	1059.26971694694	1242.86467048627	1209.87149320878	379.372245025045	211.721991175898	219.730122772426
ENSGALG00000008285	NAPEPLD	-1.67650037617462	4.02419131051312	7.45733331020087e-07	2.3775627810864e-06	722.668179330363	634.611839834038	512.872857831327	161.519869556871	206.050426413054	305.992672772359
ENSGALG00000008286	SUMF1	-1.42065986156017	3.32023740973197	0.000157140442501281	0.000362713833779061	399.54140235549	423.443982351796	271.883965142535	141.29169862986	110.061533058935	228.277640228071
ENSGALG00000008287	PSMD10	1.69597025686758	4.69475774699762	9.12438868284278e-09	3.61892246114066e-08	328.496491463636	321.472864445262	271.714805057422	1352.92620354521	846.910045246144	1214.9516201435
ENSGALG00000008291	AP3S2	-1.14546750286303	5.61581114616627	5.16153638116658e-06	1.469990487941e-05	1678.98204387746	1723.02229765805	1704.68943410697	905.424902785991	668.000397664248	1092.30879979245
ENSGALG00000008293	SH3PXD2A	-3.77437062273426	5.3268309658111	1.08985667112965e-19	1.14538581847802e-18	1480.63667617445	1862.73953120499	2309.02833090694	82.5975014484908	214.996042585835	153.896584042945
ENSGALG00000008302	CIB4	-2.23049945728218	3.81781103693299	5.22158075960751e-10	2.35717582078538e-09	528.380790142434	649.986034857482	574.118265173599	121.975380046027	154.971766736998	138.50692563865
ENSGALG00000008308	BHLHE40	4.2687038974814	5.61559148777457	4.78850980881231e-21	5.71647215070007e-20	135.186188419697	147.125639921633	82.830086630745	1894.98744149185	1198.80779143661	5651.82686968174
ENSGALG00000008319	PLBD2	-1.09078111661263	5.55066251497866	0.000625780744950485	0.00131324842093011	1354.1347890576	1570.3046348832	1897.0087244392	1185.20994502442	437.852952341628	1025.98867306616
ENSGALG00000008321	RNPEPL1	-1.02006966664655	4.0539366829747	0.00420462689289799	0.00768549703424836	643.299793169595	504.808333383808	530.112554436768	244.385272581402	190.339955743418	561.856685447554
ENSGALG00000008328	RSBN1L	-1.97227137623874	5.39227042414454	2.80422443145068e-10	1.30408235043234e-09	1269.95319656069	1872.0843783515	1916.39078971466	367.847012264791	540.218482639534	534.363139038002
ENSGALG00000008337	Uncharacterised	-1.92889637844701	4.27717189909614	7.18365520016858e-08	2.57504915999556e-07	983.30677345095	813.086952360224	523.364516818297	263.732352801598	135.825195935702	315.983464843645
ENSGALG00000008347	ATG13	1.13275622574741	7.36905589146251	8.90647953495728e-06	2.45841078193836e-05	2419.59629356407	2475.53088546162	2938.43526940363	7349.39862714275	4571.67566156763	7973.40653366553
ENSGALG00000008354	HARBI1	2.52599537023712	4.86647311004823	1.12844107454281e-06	3.50914747283971e-06	198.117689925419	202.628126838178	249.594661047312	1151.81583388775	331.42527381639	3286.80221698389
ENSGALG00000008362	SSTR4	-10.3237972764829	1.58694158691994	2.92160030668411e-26	5.11878267735156e-25	99.1777986054532	163.864928588476	183.781993881429	0	0	0
ENSGALG00000008365	CHRM4	-3.77698972863438	2.57824286677689	5.62980495896072e-13	3.35586980542454e-12	331.770542873572	277.0138512773	227.404390694212	34.2644395372155	6.84832920684214	30.7339540273454
ENSGALG00000008367	MDK	-3.12868827770225	3.92687759377127	1.30151891721891e-11	6.86090834621398e-11	733.773152402872	758.488576635305	568.562379936434	97.817329820672	28.03454143954	162.077124561931
ENSGALG00000008368	RAD18	1.68271664655517	4.7379503189445	1.96137487908204e-07	6.72015371254586e-07	452.910445041226	246.234534468711	257.502030639034	1254.28615033201	862.889480062109	1430.08929833492
ENSGALG00000008380	DGKZ	-1.36307578940769	5.90529385882266	7.77577167158397e-07	2.47077287207039e-06	1934.38335932826	2613.77898061142	1979.45872657372	849.070665643551	985.793118897306	1009.94302925959
ENSGALG00000008386	KIZ	-1.76023817610922	4.6054487858244	3.58962240142926e-08	1.32505321208339e-07	837.717645130884	996.783695628087	1003.28022880237	333.271313984027	324.13108958372	271.028984120075
ENSGALG00000008398	MPP4	-3.04369564143707	6.09853118245601	1.71227022535065e-11	8.91630938312749e-11	3688.09967382392	3433.29570903019	2128.32631639367	469.280702090908	537.783063127845	178.913748560887
ENSGALG00000008401	ASB13	-1.44544012778064	3.76505713588604	0.000179230686486012	0.0004099925137744	578.706205260138	528.833704602377	391.53262826168	219.753671898092	228.418042502247	154.173574768179
ENSGALG00000008409	GSTO2	1.00068869669113	3.74603669280266	0.00563621811093771	0.0100799839273688	178.841346731087	236.341847186392	257.405799399263	364.818248508218	545.226677844455	609.50324606467
ENSGALG00000008411	GHRL	-1.30021692162076	0.821035953275458	0.0235039706362894	0.037293116706437	80.4124741461993	51.9785194932717	50.8024531335236	27.0426326217125	6.67859493836554	58.205026610846
ENSGALG00000008418	LARGE2	-1.09029079698106	4.887393897288	0.000309927164535885	0.000685208198573003	904.373540512567	1271.50645607036	867.273765209154	665.723786687103	403.551042601499	560.986566749324
ENSGALG00000008425	MAP1A	-3.21811700195217	8.28167621578809	3.48414921110316e-22	4.5572259355879e-21	12312.7421769147	16611.2977735071	13614.4631565532	1049.37422969069	1951.65017799224	2151.32503295484
ENSGALG00000008429	CRNKL1	-1.28656511285955	6.7702496615754	8.83691596622586e-07	2.79123640057284e-06	4372.65819856871	3219.38168436443	4122.03072511014	1517.59131486793	1682.12365469395	2292.6024999446
ENSGALG00000008434	SORCS3	-6.63015691752815	2.90780011069134	8.35805372836129e-27	1.5143834234871e-25	384.177049356659	367.527000767195	364.965704074727	3.27405140993657	8.54981022460803	0
ENSGALG00000008437	NET1	2.04962598852914	3.71202007291727	2.33012091801428e-09	9.88624239783219e-09	108.17053048685	141.920142440268	133.040060824791	592.022273424192	453.710805746355	797.377633965305
ENSGALG00000008438	SLC35C1	-2.66733157320343	5.89330555615853	3.1756448088928e-21	3.84996134372443e-20	2182.07889599961	2546.99000559969	3036.09261503335	516.714602084745	400.52562248224	464.254695196216
ENSGALG00000008440	CHST1	-4.52473371899614	6.00323816537582	6.78146610867872e-18	6.25035337035482e-17	2611.96702361775	3095.04064099255	3591.53625330995	44.5141398444739	102.766658778936	351.414851333192
ENSGALG00000008442	TENM1	-2.4224726772475	7.2709312499386	0.00154283766752858	0.00303150459028616	8218.78732898864	6722.01667935185	4769.68990739954	523.486147506308	2894.56326950922	156.112156684295
ENSGALG00000008443	ARHGDIA	1.29809866099525	7.98254745991949	1.15757525716717e-05	3.14931705349912e-05	2978.63346452121	4467.30267228485	3620.7080343515	6828.02850011147	9780.820185994	14816.8724100692
ENSGALG00000008454	NOP58	2.16314053538417	7.54695358607428	3.2363691526035e-14	2.16132749602116e-13	1787.81848999099	1337.3886364077	2038.36378906555	9302.20824108642	5636.58589352462	12243.3912051792
ENSGALG00000008456	CACNA1B	-5.67661345603176	4.73753287742494	2.28435327831799e-51	1.69259092348221e-49	1188.4580134987	1458.91392585619	1306.05899773011	28.3840284880536	32.0721575202621	25.6387598727012
ENSGALG00000008459	BMPR2	-1.87757717990649	6.86060336005789	6.5355589140759e-13	3.87315093285919e-12	5002.70448559818	4166.37164283201	4654.60975445982	1165.33913361407	1361.08216194918	1760.98452894295
ENSGALG00000008465	SORCS1	-2.93076928570574	4.77373900564124	9.87633000828645e-07	3.09449007559422e-06	1374.35134262753	1292.42657721935	988.472862227981	229.715440255933	235.371061707497	32.558150324532
ENSGALG00000008466	Uncharacterised	-1.68773571972575	4.37401074128337	4.48480774024846e-07	1.48038837876843e-06	863.560048439619	716.246378780168	809.526046671148	203.320534155838	206.201618722036	470.39164363051
ENSGALG00000008469	Uncharacterised	-3.65756489950393	1.19092793376398	1.9824081303397e-09	8.45695690984094e-09	106.600014553998	110.44011550766	96.1515826549777	1.66964873459139	5.93928842967816	22.1425653446056
ENSGALG00000008475	ARRDC1	1.53685829624988	6.3774679815622	8.25446811045818e-10	3.661505369532e-09	1181.9325589871	1090.10080363752	951.41984047799	3811.65931942782	2739.33168273685	4200.94734111278
ENSGALG00000008477	EXOC4	-1.07258177716867	7.42843832367055	0.000198806732679967	0.000451657022188147	5813.51949148506	6227.24578169936	5630.05003290439	2024.90233184331	3338.18706400448	4203.73274479993
ENSGALG00000008486	CACNA2D1	-4.45057541153018	5.202168746933	6.0009310379546e-17	5.10194540746102e-16	1821.89115783196	1585.92005869	1913.01586323966	41.7412183647846	157.985072229439	53.6083160974662
ENSGALG00000008491	BIRC8	-1.01032495871875	5.54695596832603	0.0017723358114532	0.00344215695816427	1522.35392685379	1440.13910621989	1759.77427838329	605.247666289377	1116.58622477949	850.740668503268
ENSGALG00000008494	CREB1	-1.34061683403151	6.61695794750898	1.21629680848389e-05	3.29757656805433e-05	4204.97336082854	3261.75260068796	3181.98937861092	1287.51227351961	1917.5321779158	1398.39490824422
ENSGALG00000008496	VPS18	-1.04272239703069	5.37864834446135	0.00094502283141396	0.00192443387272276	1229.82300996759	1439.10646056305	1563.70183556229	623.323005117099	942.926806061732	683.984817968643
ENSGALG00000008498	MALRD1	1.82797263299217	2.03987790020427	0.0280582382031406	0.0437550162596419	30.0976399448222	58.1457155783051	46.7969162467546	82.5975014484908	366.693757912896	21.3745255615201
ENSGALG00000008504	HNRNPLL	-1.09798680182736	6.65839579654563	1.65733231828324e-05	4.41212335154367e-05	3418.38907918165	3070.48402291356	3925.86965201726	1892.60663787576	1693.26634688251	1901.77878904191
ENSGALG00000008507	THOC2	-1.08745202500979	7.78231527166608	8.54308803538367e-06	2.36499638099131e-05	7663.81297649054	8099.29067529197	6898.81224307569	3951.78005179344	3272.86735397995	5055.5674651761
ENSGALG00000008508	PYGB	-1.20365665036135	5.55810019693407	3.70555008320771e-05	9.43133961880327e-05	1702.64673518257	1408.70597745325	1855.39394052869	983.550564241542	461.657875114518	1090.45335568891
ENSGALG00000008514	DLL4	-4.93695644907177	3.00533917200764	8.81286503934362e-11	4.31628615276272e-10	293.023352920788	511.966662638258	365.935027274009	10.571902269818	0	38.0600014675953
ENSGALG00000008517	MCTS1	1.03663906288606	5.82122352343741	7.28798228610403e-05	0.000177586825391508	1014.9446615154	943.487404801968	843.17261096865	2262.86889170738	2017.30424271117	2184.85980242905
ENSGALG00000008519	NR2C2	-2.19021109002524	6.21190933314277	3.74312137406436e-10	1.71307863299571e-09	3437.66014309772	3372.66232143624	2391.0118966905	718.965151954867	940.482667844	514.251810254147
ENSGALG00000008520	EIF4G1	1.75799483824384	8.8591799106993	4.16079146823262e-12	2.30415771370227e-11	5122.07493434954	4792.72669264457	6122.21851331225	20007.5558861152	16835.7543646851	25579.0351527291
ENSGALG00000008536	KLHDC3	1.03796135483247	5.26531751337431	8.85384767474783e-05	0.000213125691430997	704.607936938871	662.043709738961	536.79206817113	1508.57926113825	1231.82587206569	1730.26800482688
ENSGALG00000008538	GINS1	2.97070820350831	2.18133190889895	1.5825209951704e-10	7.54185266221525e-10	21.8270093995771	28.2143737412065	25.917412174708	169.245564986852	255.67095705544	242.029887965345
ENSGALG00000008539	ALG12	1.78989326707383	7.12875026494855	7.37460080196814e-10	3.28329407306155e-09	1889.1276635334	1336.33533810624	1524.94709053766	6371.10912122286	6429.43973702363	5376.52108265874
ENSGALG00000008542	ADD3	-1.90721388212632	5.93903796778249	5.36889674335612e-07	1.74914462066156e-06	2148.83792141911	2647.73478195052	2528.91404198917	806.107548073621	896.773737922199	384.606330619911
ENSGALG00000008544	SLC8A1	-4.03469780092939	4.83603795240898	1.84755127918103e-16	1.51166394915348e-15	1162.0755192756	1703.3879216317	1202.69091766489	107.481006409816	119.275324748273	36.0568434956166
ENSGALG00000008546	FGD5	-10.1879368750854	1.45354004404316	4.74850919392168e-24	6.99771971544258e-23	80.2603731861924	150.555870693826	175.773782975615	0	0	0
ENSGALG00000008548	MDH1B	1.3454178809917	1.1834711585033	0.00290780116338213	0.00546185622857062	31.95886963193	37.4570064708272	24.0097103395348	112.002513942365	61.86737099769	99.6783695628087
ENSGALG00000008557	ARL5B	1.86151898925704	6.21130651861092	5.94017899504021e-10	2.66885481067813e-09	801.00367683769	817.421502014164	799.407256000851	2733.03291610066	1991.49075855695	5861.02841285573
ENSGALG00000008563	ENTPD6	-1.82152320301062	5.61890535204465	8.72608782768493e-10	3.86553449761474e-09	2137.93067702722	2369.3218703241	1288.45640084843	622.853937747014	555.499247042736	680.267367879652
ENSGALG00000008564	NSUN6	-1.56463486641171	3.17198196705529	3.88036746087602e-05	9.82912789029768e-05	432.362723307825	279.274418294358	301.501515335912	118.186320346743	117.710235788693	154.421499171632
ENSGALG00000008567	Uncharacterised	-2.63418679698355	7.15958550447776	6.38589401151487e-21	7.54195122660033e-20	4840.31168158043	7325.51834916504	6467.9598769769	1070.40510481907	1087.83513775045	1228.93741580893
ENSGALG00000008569	CHP1	-1.09835902843987	6.11515859028905	3.66797978811106e-05	9.34647760417234e-05	2499.05463684852	2543.93794552071	2105.81825832096	950.583794923967	1140.07135187462	1765.72754716413
ENSGALG00000008579	OIP5	1.48528218112254	3.86229820728784	1.74447528167931e-05	4.62739513218255e-05	166.130615938015	228.277640228071	181.522415974009	744.30102052558	391.581308287048	736.55613309412
ENSGALG00000008584	NUSAP1	4.83476916850071	6.11826671569698	7.48023976421528e-56	7.18916086904256e-54	128.288630081048	136.351586595729	90.742161149271	3778.15635151705	2930.62011300484	5063.20978764838
ENSGALG00000008590	EEF1B2	2.35110841207986	10.0401346997956	4.27227495266492e-13	2.57677047281468e-12	8079.57066225459	7393.15083422396	10638.5893181306	61073.3998666182	24776.3691263572	72705.7683099914
ENSGALG00000008602	SLC39A12	-2.59938613644148	1.15219205678508	0.000124718684711619	0.000292303218824918	70.9377805486257	96.6128555380708	113.702195347106	17.651377943414	27.3933168273686	2.88130819006363
ENSGALG00000008603	ITPKA	1.29068273901547	5.2306092825031	2.777454872543e-06	8.19099031725296e-06	566.920726888475	559.280218558775	519.595910274808	1661.03541530782	981.518213785002	2076.73715619273
ENSGALG00000008604	TMEM255A	1.31997982200788	6.79017574522347	4.3627929223152e-05	0.000109715059781317	1818.23140441659	1171.73199729254	1797.45422405518	4037.22038805991	2427.87628888232	7999.1891574154
ENSGALG00000008606	NDUFS1	1.73146416235367	8.04458928061984	1.42963043966084e-09	6.18232426515216e-09	2727.55078561304	3511.99567314359	3009.744852898	8221.35036912798	12160.0991309231	14418.3062338663
ENSGALG00000008615	Uncharacterised	-9.82900988253405	2.71625571219391	1.49453503652463e-31	3.70505012886471e-30	345.286813811432	178.590412133366	462.262221461844	0	0	0.854981022460803
ENSGALG00000008616	DDR1	-1.84643666880727	5.92570793713597	2.94549671351431e-11	1.50601861647418e-10	2767.8206680757	2027.1622602376	2398.75930882638	642.012130019174	774.717012850403	833.876095526814
ENSGALG00000008621	NRP2	3.86784593799684	6.10663653805545	2.40090718506242e-20	2.68266486903815e-19	272.703173191459	244.91573591745	150.198557090418	3205.05275516592	1582.82700039263	7220.98687280271
ENSGALG00000008627	TTBK1	-1.9743375709258	5.48898483482113	6.17060205240341e-11	3.06290026276296e-10	1987.92207913788	1888.97796757592	1536.91166019137	473.955216688317	578.03749531181	469.568659151082
ENSGALG00000008628	Uncharacterised	-2.14674842605693	2.82065888847764	0.000451246255576694	0.000968270358795292	312.141720590227	338.318645693446	215.455217660122	13.3767288643654	98.6400532131962	108.431879108334
ENSGALG00000008631	AXL	-1.96716648929196	5.87555559087806	1.02472739919028e-10	4.96201514985788e-10	2139.92921778232	2560.00187746756	2372.74061780877	585.211881474281	401.495897846244	1188.70613955251
ENSGALG00000008633	2023-09-06	-1.30400813202277	7.99079505939525	1.75843093967817e-06	5.33685802127038e-06	10223.891102848	8802.25242356875	8382.63750810984	5195.10303348033	3410.37644729374	3917.83075571869
ENSGALG00000008648	UBE2A	-1.35887846884596	6.88633555789713	1.02238656067607e-06	3.19658485484364e-06	4122.49910633217	3162.31470331608	5588.87041232715	2004.48486277482	1593.71426717506	2125.97222352245
ENSGALG00000008651	APMAP	-2.52210954860349	5.1995568072026	6.83595137869132e-19	6.77111449854989e-18	1780.56559377896	1339.80830837959	1610.83329368879	305.228225018507	282.583397259719	346.797660770605
ENSGALG00000008663	DDAH1	2.6025375651618	5.95174218349705	2.53943861428665e-16	2.04620743264179e-15	304.823182113085	536.738961367228	480.757913274888	2173.04782807069	2657.23764343801	4521.74492300367
ENSGALG00000008669	CD28	4.800313939301	1.44045722115721	4.35361835795974e-16	3.44317473354919e-15	1.66964873459139	7.12714611561379	4.6615927041275	143.601672498361	151.302958245494	132.208426150594
ENSGALG00000008675	SLC25A5	1.14275416022926	7.63788893977715	7.84135280972406e-05	0.000190301669378536	2924.45425864284	3406.37013134978	3065.47507670978	9626.39868682236	7189.34134794063	6218.92151022042
ENSGALG00000008676	RRBP1	-1.20080807604284	4.99476460574112	0.00173636434990708	0.00337773546095887	1215.86844539634	1282.92033808176	859.590276702317	651.536230577377	619.861241284082	302.648490556267
ENSGALG00000008677	VIM	-5.1098971756801	6.73964030146086	3.33697572633244e-46	1.8138651253421e-44	5748.04334224252	5722.1050443165	4250.78570432264	128.110533988886	209.330008071774	164.460400357252
ENSGALG00000008681	NSMF	-3.22641081266383	5.22721335874974	1.45783639874365e-12	8.34496510856153e-12	1608.5358514989	1277.28128196241	2227.23316112931	182.967513637004	290.727312419994	102.709307422124
ENSGALG00000008689	Uncharacterised	-1.6900352599735	4.69503888725086	9.32218107073942e-08	3.30411778570863e-07	1038.31634961259	1028.39076922746	920.097748693654	380.881314022621	356.527086366155	285.927579475811
ENSGALG00000008691	SNX5	-1.74598774737929	4.373934653102	4.18439511364937e-07	1.38467146687454e-06	783.201759822348	627.299856083509	999.575828017372	200.357848150966	296.964421483908	309.995914824479
ENSGALG00000008713	BIRC5	4.47553136385719	4.6848896423815	7.72800548023292e-32	1.94860335901767e-30	35.2396742327266	65.1596681495194	66.1042130752972	1084.43685311711	1121.33765552324	2147.82883842674
ENSGALG00000008716	FLRT3	-3.82215407885595	2.57085636342618	2.34161064614485e-15	1.73987574228679e-14	311.441125731601	298.470537824827	222.89810606795	29.6964421483908	19.8117689925419	15.857853404727
ENSGALG00000008728	PTER	2.02818327292699	4.53204276521242	1.58284207801241e-08	6.10091092144102e-08	240.109015838636	312.126234413953	135.087001548807	859.454829535477	1027.93318611647	1302.32393750115
ENSGALG00000008734	PCSK2	2.60601963071183	6.89750209847975	3.08647240325578e-19	3.11299494177805e-18	1001.73481407879	966.936516401267	577.112190161042	6010.33148787018	5066.98378610944	6550.4268863445
ENSGALG00000008736	PNPLA7	-1.52318875567457	4.30787996069721	2.54412640996602e-06	7.56394274274362e-06	700.229457395398	657.967851015973	858.687621129613	303.609261503335	289.091255069718	267.38086514482
ENSGALG00000008738	Uncharacterised	2.07247010395234	3.18459353529596	1.46835841324269e-07	5.09679079686937e-07	66.2700883714636	100.404243238055	94.9028934931492	509.987787953931	299.035108688426	454.272504053862
ENSGALG00000008741	PROKR1	-9.13883216243112	0.435186625557517	4.46528099864819e-20	4.91069833209543e-19	73.5283679316291	58.5231887815987	64.3756136759806	0	0	0
ENSGALG00000008744	MCF2L2	-3.31477440970533	5.93947792935497	4.16300026474653e-08	1.52382511881305e-07	3211.96718276995	3090.63596283653	2136.40525035905	171.182179036873	586.92528578976	95.169977871709
ENSGALG00000008747	ITGA8	-3.74696935967115	2.13343531713322	1.98054887202688e-10	9.35470786669962e-10	245.386851567391	159.451454153477	205.499379666864	19.8117689925419	22.9057882512723	5.522005775383
ENSGALG00000008753	FBXO48	-1.75835225210064	2.85228135475691	7.84962891684128e-06	2.18213431825751e-05	323.980692936861	237.867801070904	274.995887614073	81.1278978651374	94.3351535044133	103.3436186764
ENSGALG00000008757	CNRIP1	-1.41553552777647	5.71389710639057	2.58723152902118e-07	8.75815512236037e-07	1780.07048876339	1734.79452459739	2257.29974405777	715.650402115003	594.509923216463	1235.40873201607
ENSGALG00000008759	LAMP3	-2.91232147786281	2.35031277653309	1.20940986072662e-05	3.28024600875607e-05	236.823051985412	227.424951974574	209.847434059732	19.7280106426392	61.6349628615792	9.60436063354544
ENSGALG00000008764	FAM171A1	-4.41445372866979	4.64643043393519	2.0530556073055e-31	5.07070326251263e-30	1438.49565766805	1203.85631584093	972.615008823254	58.5332612190598	74.1168449632119	54.26358387422
ENSGALG00000008765	C1D	1.27604143291949	4.93315354401336	3.31445481094455e-05	8.49789564228834e-05	348.9565855296	487.021651233609	511.609799277993	922.398473041618	1013.84026036032	1885.97323061795
ENSGALG00000008778	SPRED2	-1.59095578891506	4.17158838884156	1.51879694316826e-05	4.05389491995184e-05	523.434878294399	856.445391559591	661.946163986105	160.340517758906	217.56702755009	418.660016143549
ENSGALG00000008785	MCCC1	-1.32872497480184	4.58922751461448	0.000183809116971384	0.000419452910941408	969.664214157255	898.416350432448	732.140970118323	292.212990740166	496.459622989578	340.062856345812
ENSGALG00000008786	NBEAL1	-5.32694075519566	6.79593575726757	1.40084120379048e-18	1.36012861536407e-17	4423.460108063	6953.30967236227	5030.93124662451	70.9600712201339	277.958698508938	68.7584923858806
ENSGALG00000008793	SEC23B	1.00568843777118	7.90835637377446	0.000609289795921678	0.00128331118998082	4402.14300413533	4339.84174629186	3350.15018595762	11093.4029289529	8566.84199201031	7253.20594895095
ENSGALG00000008798	ZMYND19	1.66527148912378	5.73922917496586	6.12518271472107e-10	2.7473215537824e-09	675.891023297375	696.908109267061	562.953795867807	2755.48088191612	1708.69375009783	2577.1028218418
ENSGALG00000008803	Uncharacterised	1.05886567113791	3.77146977488653	0.00148693731335889	0.00293165595169897	241.974298641756	185.364160227427	239.00575292537	440.315226567314	463.169236928652	695.671954240436
ENSGALG00000008806	RPL12	1.43185078414958	9.24965432750737	9.53717531384691e-07	2.998140701293e-06	7949.76882094258	7510.61001543254	9453.27777095686	27914.2754023228	13752.9493636757	38395.900292324
ENSGALG00000008807	DCUN1D1	-1.35512697853857	5.88822637679106	1.86267351625418e-06	5.63518221853996e-06	1943.46803393487	2177.87907781106	2317.65377357936	715.444482772409	1050.0661943671	1052.35455295678
ENSGALG00000008810	FAM161A	-2.0847057969216	2.73299824442002	2.63022542108759e-07	8.89688338686168e-07	287.453168978944	206.201618722036	313.594429087007	61.7661033296893	66.9553810421805	88.352092406128
ENSGALG00000008815	LRRN4	5.17507098864371	5.42822347031846	1.22115455811712e-52	9.69830712832779e-51	49.8391847814044	49.0796926490353	75.874449005009	2531.93309035095	2143.43742330923	2473.85879435358
ENSGALG00000008818	IDH1	-2.06359924598755	6.63085783590943	4.49294418648349e-16	3.54701897293634e-15	4287.49988962127	3532.77734183084	4279.55447592182	1131.78425416797	937.507764473063	1227.05698957151
ENSGALG00000008821	NDUFA5	1.16922685394278	5.86144575235743	6.37865402320171e-06	1.79009920249099e-05	964.418593335786	762.473545268828	978.094001335061	2379.79439937764	2030.36183793151	2489.37042202177
ENSGALG00000008835	THAP10	-2.07469347627351	2.26184991776331	1.4884407967871e-05	3.98168420487845e-05	189.298428351987	125.223655094354	264.892263963646	74.5854832660399	34.3586823769084	47.4892496682938
ENSGALG00000008836	ATP6AP1	3.57424194930233	5.85114215350168	6.75405832300473e-33	1.79517185446917e-31	218.979422444836	277.20301937463	179.546014716769	2533.2180286892	2648.74500786172	4110.13891230642
ENSGALG00000008838	FKBP15	-1.10672371461434	5.92420056302627	0.000120362177996992	0.000282942851253828	2137.93067702722	2404.24508536342	1731.33657048313	768.325864146988	1134.87977012656	1408.4730402072
ENSGALG00000008839	ATP11B	-1.47826353346806	7.43334161052925	2.88368462085253e-08	1.07736082046104e-07	7901.39963349611	5026.93952929845	6323.80101396861	2404.79114536043	2271.55710341158	3245.22719797615
ENSGALG00000008844	SLC31A1	1.72848626019044	6.09156473672479	1.88394387529507e-09	8.04726171273383e-09	809.526046671148	779.228451099715	801.431392603865	3164.45287533252	3110.44773182907	2465.89620443504
ENSGALG00000008850	TTLL7	-1.22129599434772	4.40798912864679	0.000658291572619298	0.00137603169860516	851.906788195481	827.243656243973	564.28747482413	251.649711760874	439.207815886126	373.233941772897
ENSGALG00000008858	MDH1	1.13433453394977	7.77028261456477	0.000113403659642356	0.000268010110092047	2775.79102125818	3898.54892524075	3665.17726362024	7075.24559407568	9783.8898328236	8236.98558077642
ENSGALG00000008859	WDR31	-2.61553781680028	1.41592689511683	3.49672961284588e-08	1.29256200822673e-07	94.0479124706884	117.88242311722	127.712911002349	23.9691522239475	21.1295933938	16.3702570496829
ENSGALG00000008860	LONRF3	1.07851147460254	5.4253565998062	0.000119048911787073	0.000280103905806626	692.091079318641	549.314433680566	844.566814700235	1748.09726404781	1143.52742885198	2257.39596097657
ENSGALG00000008862	DNAJC10	-1.07604628719761	5.33962793267765	6.80685441662983e-05	0.000166720794326429	1595.29287221155	1360.0196714292	1197.26793205689	710.129942714254	707.114764108482	806.440338807639
ENSGALG00000008870	ZDHHC6	1.50793150035437	6.41585593307659	7.31261519459319e-07	2.33366735625336e-06	1060.67214616272	815.623406847892	1481.25853436173	4423.85147621699	2154.90607933123	4592.1000028085
ENSGALG00000008875	PLCB1	-2.01456846835033	3.71778270959288	2.06337071134412e-07	7.05503628372184e-07	561.822612303347	685.28879074431	343.557848543247	116.2127636659	147.332313447146	183.820919829073
ENSGALG00000008881	RGS3	-1.19786053896843	5.38141075698069	0.00306173135910494	0.00572989177590077	1174.72136144013	1293.29604434107	1918.34480636805	730.151080786237	247.942837086821	1382.66634642908
ENSGALG00000008883	TCF7L2	-1.99975552347077	2.89553126937168	1.1863567533707e-06	3.67889867195594e-06	328.00714305775	317.500538558624	248.777661454116	103.3436186764	75.7508814420718	70.4793484654532
ENSGALG00000008885	PDE1A	-1.82943128568593	1.01772260055343	0.000620333727509514	0.00130334037704285	55.1790065655073	82.0269916193947	94.7352206946496	11.5252327602545	32.7405140993657	28.2143737412065
ENSGALG00000008886	ZNF618	-1.18545414291815	5.60771760120568	5.96410896237522e-05	0.0001471117299014	1838.77639203711	1679.8026748071	1603.19384039894	563.432493801669	934.698929397533	1042.46961501104
ENSGALG00000008888	IL1RAPL2	-2.86535945711284	2.6238851269315	4.74730781752194e-10	2.15259978064251e-09	291.349544007969	274.869459015267	247.385858737158	65.1026340893078	24.2099066515751	38.0114459499402
ENSGALG00000008889	TTC14	-1.69094105113146	6.0311160613449	3.36730952823244e-09	1.40089793829821e-08	2938.63274489275	1891.71201629204	2721.38195847853	710.892887379443	883.634831385619	1056.91190540831
ENSGALG00000008896	PPP1R1C	3.08098795659354	1.35200357894552	3.31089355065375e-06	9.66594346518176e-06	14.5346773818337	8.36045554022838	16.6130615938015	99.300773499211	198.810265114391	51.2934720890063
ENSGALG00000008901	PTGFR	-2.62931083566489	1.27565242237069	1.64129487052455e-07	5.6585635216447e-07	81.8127879949779	142.542922312276	83.9086686742949	26.4297556745449	12.1484127058426	18.0284217478083
ENSGALG00000008903	ITPRID2	-3.0653835989236	4.90086056310613	1.98997932886764e-21	2.44380517025662e-20	1289.03215496829	1162.0755192756	1581.03857998033	231.914237030343	132.148778372725	185.539394052869
ENSGALG00000008907	PLCB4	-6.11162516803464	7.10768696679486	2.54518936846223e-25	4.14194436735147e-24	8118.45289096809	7065.13816716888	5399.64400766854	83.1500380154943	184.132911813036	38.7636416559992
ENSGALG00000008909	USP13	1.20457305821583	4.72423441103889	0.000148254427983371	0.000343458249492306	529.604125329125	382.253553215109	295.75597736427	824.201705652214	920.486154979145	1476.4858491491
ENSGALG00000008910	Uncharacterised	-2.70146669472836	5.44088218223683	3.66564187015908e-17	3.17760837411241e-16	2050.53099526195	2280.92248225581	1363.69473082498	352.811223797638	329.146282827191	291.053991290791
ENSGALG00000008918	LAMP5	-9.58121653477642	7.46504316735372	1.08792398736032e-88	8.01618658019992e-86	9505.67900771921	8493.38678331801	8709.39754055041	7.98971740798249	23.0504655205091	6.54810281987314
ENSGALG00000008926	CADPS2	-6.31000815546811	4.83955351393093	2.26202302463334e-46	1.23971947833521e-44	1067.01631603108	1147.05450011933	2055.86637223293	19.4035994193861	22.0900294571545	18.5529579896406
ENSGALG00000008937	PPP1R21	-1.44508850148545	5.54272322143529	7.55469310695203e-08	2.70293754188036e-07	1890.77407264453	1772.57587637097	1492.51764245296	717.017258776109	674.580026721574	740.736360864234
ENSGALG00000008941	FEZF1	-7.74402494527695	2.9318206904871	3.23151854432326e-29	6.96904560217227e-28	278.403169489605	466.204040976053	397.203093996844	0	5.45675234989428	0
ENSGALG00000008946	NHLRC2	-1.21492912573775	4.74207550437171	7.8453416478966e-05	0.000190328820698834	1115.39836709356	1013.89641314773	696.864557952168	425.194444704491	458.723175583123	483.363308664206
ENSGALG00000008947	PAK5	-2.5120613193623	5.8294254763227	1.28843205748119e-05	3.47680048390092e-05	1799.88133588951	2710.69123930511	2805.11340970872	257.249621898904	880.20772059605	157.247900800328
ENSGALG00000008950	EHD4	-6.43840539664676	1.33494849228287	9.86825733881042e-19	9.65211630417718e-18	95.75787451561	90.2929198344665	183.781993881429	3.42416460342107	0	1.09135046997886
ENSGALG00000008953	AASS	-7.04103377034797	3.50614743621016	6.77604862134047e-37	2.24116540810072e-35	711.560506426215	541.202987217688	447.284371402218	5.19158174806296	6.84832920684214	1.92087212670909
ENSGALG00000008954	RUNDC3B	-1.88241782459618	4.03869807551513	5.36856228407845e-08	1.94597544612551e-07	787.549645775324	654.953774929913	508.332300807081	170.077777881796	212.334745029742	209.540916191219
ENSGALG00000008956	CCDC186	-2.34219106060438	4.82813258947593	9.73860779238735e-10	4.29256082254681e-09	917.471979657966	1349.40633122288	1316.89993891602	174.436387451997	355.617171934665	239.377377651455
ENSGALG00000008960	KCNK12	-4.13631782814622	1.07344594079204	9.24375694279382e-09	3.66188615090425e-08	84.6431212236195	102.833603144809	106.946584010097	2.28277640228071	0	18.5529579896406
ENSGALG00000008969	EPCAM	-2.95963925706144	1.21266237413917	1.98474887105822e-08	7.55343594744483e-08	60.2223482775303	98.1593852980706	145.025845566536	16.3702570496829	9.40479124706884	19.2290477425253
ENSGALG00000008970	NRK	-5.00003764437502	3.49279442620668	1.94217813434905e-25	3.19195893381307e-24	418.247008015142	624.813142802143	601.345458832447	14.9768615489088	25.4012265667618	16.0252637758296
ENSGALG00000008975	FAM3C	-1.93101386137382	5.78197464665976	1.51281203737141e-11	7.9180844718457e-11	2622.95274330693	1961.09165456715	2009.42225208073	696.084603958281	635.142005937371	597.312478244716
ENSGALG00000008976	ADAM22	-1.2169074977366	4.31422898898711	6.97863610468337e-05	0.000170644636165958	730.153793181526	637.902757719425	730.974710127264	278.498721078247	330.390005793963	419.078580471881
ENSGALG00000008991	VPS39	-1.19846178617333	6.71662000843155	0.000122981070763766	0.000288638814641626	3433.22526212339	4031.06421602959	3619.70645536551	1129.51736895107	2221.29387269963	2011.47725183101
ENSGALG00000008998	FAM179A	3.52378646885069	2.70372955777131	5.63573526914432e-12	3.0759982252947e-11	21.3745255615201	29.2615943907993	26.9962250899274	382.365047382019	383.213989278463	204.082537886046
ENSGALG00000008999	AFAP1L2	1.75065339017721	2.5082281370995	0.000560618914157667	0.00118777774097015	54.5675234989428	111.147532919904	28.4255488367765	236.736127711671	167.784065567632	364.965704074727
ENSGALG00000009001	CWC22	-1.2283057781895	6.15805023488897	9.69314141707107e-06	2.66501108239249e-05	3018.38127592255	2026.28126838178	2526.86984281526	956.50793161983	980.083807205143	1847.11870162991
ENSGALG00000009003	SNAP25	-2.08484840370336	7.90758149314059	7.78107598473891e-16	5.99653752385777e-15	10912.8125911029	8915.72797612024	9585.3311778243	2596.57736521346	2403.63096781566	2844.9867979385
ENSGALG00000009007	PCARE	2.89939777028394	2.46792884178842	1.43414431394652e-07	4.983247586029e-07	31.7233259572363	20.1935806609057	45.4505288652431	204.390110549814	387.644805431887	185.29211240803
ENSGALG00000009012	ZNF385B	-1.4613344087379	7.38012808762568	2.34164934201769e-08	8.8356458671922e-08	6057.53758363986	6695.38318788933	5745.32853098688	3016.49269902156	1692.86242447239	3079.15577546611
ENSGALG00000009016	SLX4IP	1.66074905715043	3.07636730287306	7.21396101706776e-06	2.01471393913181e-05	96.6128555380708	114.538240901129	92.4101551155206	384.6478237843	277.566022309463	445.270991751374
ENSGALG00000009017	STEAP2	-5.78552057763169	1.93925413329168	9.5688396195906e-23	1.2950155089248e-21	215.722370015527	170.957619277109	176.798776136575	1.70996204492161	1.67209110804568	8.30653079690073
ENSGALG00000009020	JAG1	-1.1103676894389	4.50676626367512	9.68559226262691e-05	0.000231334432161392	780.866547457331	781.852211258281	782.992305982284	408.185326925681	355.780253213107	475.369448488207
ENSGALG00000009021	ST6GALNAC5	-2.29976558268134	6.98214525060638	1.41788261994715e-10	6.77427132145501e-10	5976.11201794217	5764.05937865365	4167.97246987574	1374.97943807037	1383.18057965129	730.471321383731
ENSGALG00000009023	ING3	-1.93182501531396	4.73084659437737	1.29812925414682e-09	5.64309678720069e-09	1312.23834621189	790.249694668894	1075.68672504461	268.423168245146	319.73773267425	350.418017351012
ENSGALG00000009024	CLIP4	2.07596830307273	5.03176951714812	1.322045303483e-05	3.56243130030375e-05	424.67138699155	281.922885681668	241.069451901991	1561.72252253974	2043.40464368132	581.051660045872
ENSGALG00000009026	CFAP69	-2.36993257396807	2.46673395302529	6.63089433919296e-05	0.000162591147385314	291.349544007969	157.697542191451	245.177056427005	77.12158192118	9.18306804025262	76.0228918998805
ENSGALG00000009027	ST6GALNAC3	-3.37116458642748	3.79196189218452	3.94270839729252e-13	2.38559039567932e-12	544.265655668868	684.250474394698	675.701815075091	33.6152622174091	98.2215422980971	69.2534628193251
ENSGALG00000009028	BTBD3	2.58066107693332	6.86155394238599	9.16030245766133e-16	7.03085020231263e-15	964.595888790097	908.545008107724	647.333906700963	7435.37075196595	4916.99586017208	4426.86120855093
ENSGALG00000009029	TSPAN12	-1.02096457173272	3.54788259984315	0.0155202642166867	0.0255486240915869	318.533356082701	335.376180924867	525.038572524564	185.364160227427	277.20301937463	167.576280402317
ENSGALG00000009031	SESTD1	-1.16180290115196	6.82193028636396	1.36291372135515e-05	3.66585371858311e-05	4493.6656258945	4038.10467995044	3302.8384674623	1961.41645141604	1979.12007631496	1977.6989261235
ENSGALG00000009032	PIF1	4.52451290109898	3.24390798132787	6.60606328374406e-23	9.07000179423369e-22	17.0996204492161	20.9011388505709	20.7663269922518	636.894616236319	293.893435386491	663.541085747145
ENSGALG00000009033	FAM183A	1.99835589515068	0.160027341780168	0.000505111954363602	0.00107726884583277	12.0189478318722	2.50447310188708	16.6300076030989	44.2851306892112	45.8115765025446	51.9068542886002
ENSGALG00000009034	ALK	-3.74316053402522	1.64784391621702	6.5558423464662e-11	3.24925773696492e-10	164.359900964211	131.579740679573	138.601509687315	3.41992408984321	8.36045554022838	26.9962250899274
ENSGALG00000009037	SPTLC3	1.91981895667163	0.0700386594487415	0.000402834178572356	0.000872719652140667	15.278906579704	7.69482920214723	7.52440998620554	48.8008684317918	43.3727516433335	37.4570064708272
ENSGALG00000009040	TBC1D8B	-1.56560692396255	4.61201906278378	5.42259511792671e-06	1.53872227319345e-05	895.087725511255	916.652958713578	948.495299731915	207.871267456628	409.810901647793	430.031926955762
ENSGALG00000009047	YPEL5	-1.92713958302097	8.05248640571887	5.6425679120337e-12	3.07846064242299e-11	12253.3308155749	10572.6677761036	9001.91115254946	2835.41629632835	3314.39241263465	3188.30952620594
ENSGALG00000009048	ABLIM1	-3.33503378500654	3.97318295524565	6.33152563440627e-07	2.04169765351642e-06	790.751227034846	818.2900315533	547.644784945974	28.5085844624552	157.328753764303	29.0727312419994
ENSGALG00000009050	CAPN3	-2.68735278824051	-0.320534961688855	2.59051916070277e-05	6.74613305093282e-05	31.1494904883777	38.8071988387721	26.8922097739272	6.54810281987314	8.54981022460803	0.836045554022838
ENSGALG00000009052	LBH	1.4486145378827	7.08093364137234	3.864480586517e-07	1.28457659195426e-06	1969.10428645506	1218.00875188442	2303.25605302919	5955.18467952288	4478.08160312373	6798.69351065155
ENSGALG00000009062	CDK14	-4.53715944415737	3.73952298304568	1.66069319685784e-23	2.37602738618398e-22	562.577512779209	639.574848827471	729.936393777652	18.2622112182457	20.1691573304454	61.115626318816
ENSGALG00000009063	Uncharacterised	-3.99235458771438	2.24199381999003	2.22877774272664e-13	1.37361892201596e-12	247.681239647457	212.256370001354	206.265238826004	5.98486715722562	22.5732299586166	17.651377943414
ENSGALG00000009064	FZD1	2.11799853546806	6.87000291964626	2.88717517123166e-14	1.93970778173464e-13	882.391086656618	1083.60202874981	1345.84275816507	5912.0649470097	3637.6153726732	7253.70678654311
ENSGALG00000009065	VMA21	-1.3466625694035	6.24712795866366	2.10452766162921e-07	7.19019844827106e-07	3230.48374396036	2203.36063140123	2814.01414313518	1118.7637273501	1061.06177083283	1543.02713403039
ENSGALG00000009066	KCND2	-7.94159994697108	1.86101830943925	1.35972308453967e-25	2.25707224909257e-24	190.1663405442	227.000897755602	123.117267234356	0	2.07663269922518	0
ENSGALG00000009067	GPR50	-5.02801039805355	0.415046162367821	1.17378290422258e-09	5.12438533861228e-09	29.0728577891526	108.431879108334	50.9031113577909	0	0	6.6883644321827
ENSGALG00000009070	HSPE1	2.63389755406578	7.40119714939048	1.67616794712483e-23	2.39558356494791e-22	1191.90115462299	1248.50493765581	1108.91038613166	6919.94905064703	7336.74332636257	11133.100513923
ENSGALG00000009073	PSEN2	-1.070950203455	6.67967296420102	6.08254173609147e-05	0.000149893628847605	4359.94512756553	2982.17380634328	3168.61264974656	1950.99642092206	1761.16199435957	1917.03038245567
ENSGALG00000009081	ZNF106	-1.18673745546924	4.85810958113781	3.90569403917055e-05	9.88761596516873e-05	1072.69109399459	833.989542928397	1136.7798054404	445.182103244176	481.902545132536	590.854617965981
ENSGALG00000009082	COQ8A	2.01746534345066	8.04138475639959	7.5894290841001e-11	3.7363993297112e-10	2656.42603678572	2156.1614838249	3082.76124199978	11822.4989874118	6591.47270280224	19985.9011567228
ENSGALG00000009085	MTMR1	-1.3707416183278	6.11287570268764	6.2425401510997e-07	2.01447226335852e-06	2633.51568571816	2745.8377824668	2171.65179705044	850.258328441226	1158.76104616765	1281.77894988062
ENSGALG00000009092	STON1	-3.69419646709386	2.72499205958819	5.29522479037088e-13	3.16353902678779e-12	361.273434569881	190.294240856724	369.974386950661	14.0221058038509	30.8885015899406	35.635730578069
ENSGALG00000009095	LHCGR	3.52505120012469	1.73275262144672	1.76622460772004e-09	7.56635561117275e-09	9.82215422980971	15.3896584042945	13.3767288643654	164.053983238789	59.3521864592985	329.429569730609
ENSGALG00000009097	SNAP23	-1.14992986678242	4.51013377900053	0.000204825990007984	0.000464139262852535	1001.85973144059	686.549761036025	683.885263190681	335.376180924867	364.102836163774	528.239834844999
ENSGALG00000009098	MAMLD1	-1.40549368028517	6.51100637284015	3.29439234591967e-08	1.22219652262749e-07	3569.61461318563	2933.70287987449	3514.20447545374	1424.24531807686	1009.30266006049	1988.47376625625
ENSGALG00000009100	FSHR	2.7305615903857	1.34949818853609	2.67932607015748e-08	1.00525888736913e-07	9.19650109425122	18.6896942930266	20.5449876205264	145.025845566536	81.8512852484143	147.911716885719
ENSGALG00000009104	ANKRD26	-3.02301880077907	6.0080509693442	2.53469825994632e-24	3.79004543649019e-23	3708.49169549104	2802.78261335666	2161.95401417778	415.254834308802	358.565276984188	434.943495361056
ENSGALG00000009107	NRXN1	-6.96971626592151	7.53138908769492	5.32630553286893e-26	9.05676798492828e-25	7090.99817580962	10236.9575373933	10447.7946481258	50.2165357816354	16.566017326149	218.344218945678
ENSGALG00000009111	HAUS2	-1.46778845820797	4.61683456508753	8.86497538604175e-07	2.79810015576087e-06	1022.68382822176	729.931408149454	969.119217341225	352.252181253851	278.403169489605	516.043225757458
ENSGALG00000009128	Uncharacterised	-1.65185045720255	3.07372198066718	5.49446459438172e-05	0.000136236836633548	342.644395372155	344.699236744388	272.763841992691	130.962056397463	117.987381099591	87.784783172398
ENSGALG00000009134	CTTNBP2	-3.9059635800467	6.43553497224841	1.8645209724237e-26	3.30162104903278e-25	4628.32915562414	3616.04177852986	4032.53998657188	243.669591401329	406.318139255099	234.659495012446
ENSGALG00000009135	PLEKHA3	1.69367177286746	5.77693442593824	4.54153195760832e-10	2.06211360334677e-09	729.347060528688	576.261638012727	651.536230577377	2738.50421494195	1579.29005154914	3056.80333325947
ENSGALG00000009139	TMEM185A	-1.06405666993072	6.18293056294643	0.000196886125294878	0.00044767712665626	3058.73354128425	2439.17838243471	1939.06307465578	1561.62323327831	1218.92162594904	1195.46849396743
ENSGALG00000009147	NCSTN	-1.47238790588528	5.97115387279275	3.87419018474437e-07	1.28715892836334e-06	2291.60044716394	2663.98649721839	2020.32015607488	754.1130897286	1064.27425835291	978.169688377285
ENSGALG00000009149	Uncharacterised	1.48293012196417	1.9688039468248	0.000693731251189846	0.00144532792719619	53.6083160974662	50.2165357816354	48.5936508233704	165.260532688243	86.8217341987521	257.765117848032
ENSGALG00000009152	ATRNL1	-1.25555322658474	5.61561324067996	6.31149900831219e-06	1.77237796627662e-05	2279.51883231835	1408.70597745325	1538.4308090217	818.2900315533	705.426590364861	978.794733210961
ENSGALG00000009157	ECT2	4.46604023666929	6.02155823570358	9.03497893478178e-47	5.07758159372927e-45	118.368063855835	182.622112182457	123.896252172736	3134.35854977928	2982.17380634328	4740.37829130949
ENSGALG00000009168	AFF2	1.29519505759528	5.94696629090258	8.70066844900648e-06	2.40560695516308e-05	732.104232184895	1041.45028923723	926.460562040149	1712.22477732347	2411.35110244933	3503.18691715181
ENSGALG00000009169	TRMT6	-1.21729209272648	5.15617519578542	2.59409197812655e-05	6.75411109263692e-05	1572.122139467	918.874505618346	1277.79213642363	612.966339425483	470.006118787475	793.488934205002
ENSGALG00000009170	NCEH1	-1.52002954088495	3.21410366352317	0.000433804531230381	0.000933866173950421	371.799455697853	385.74679626655	277.512434582722	112.648917817813	175.276322548136	102.68339717737
ENSGALG00000009172	OSBPL6	-2.88153081460794	2.54210638143155	5.28794221085208e-12	2.89929630188223e-11	245.797392882714	265.808985500823	257.953733457721	34.5756982807636	28.3751122194503	58.9936905497954
ENSGALG00000009173	GFRA1	-4.13336414353824	4.38626400085769	4.67077371348592e-29	9.97559931754649e-28	855.572672080775	1076.32907367536	1055.51923362664	81.8512852484143	54.7187854374914	54.3429610114845
ENSGALG00000009176	TTBK2	-1.24957965530506	3.53541532911257	0.000339327148100897	0.000744129623885944	384.606330619911	360.644126671739	483.458078175802	166.651939172558	177.079363019451	248.490259892235
ENSGALG00000009179	TNFSF10	1.41898879965448	4.03785848229453	3.23568296824873e-05	8.3136116249289e-05	185.60211299307	206.624953572906	280.781497480528	798.122368647626	599.151408018392	624.136146396386
ENSGALG00000009185	ROM1	-3.05430504848898	4.72891395874153	5.13698563636204e-15	3.69278268265961e-14	1332.53892384418	1090.95578465999	1152.07077344347	161.977350539564	200.884323400703	100.845786652227
ENSGALG00000009192	SLITRK2	-1.29054367729941	4.75797719038521	6.94167345832108e-05	0.000169866079479174	744.663335627758	1080.95049420143	1074.49711830139	377.945506145993	506.920130180159	427.674227017453
ENSGALG00000009205	Uncharacterised	1.56598322561468	4.40834104575213	1.62837736030096e-06	4.96486642061417e-06	235.731701515433	292.403509681595	280.075260597651	1173.29747506223	700.812355500179	831.737630865035
ENSGALG00000009207	TRIM2	-6.25695851840929	6.50609180947005	2.61599904062144e-58	2.96546968168908e-56	4741.47491967359	3295.8866020834	5533.04110108818	61.7661033296893	79.2892670236348	54.1156565987534
ENSGALG00000009240	NFE2L2	1.40399387754975	5.5868406435792	2.92028321157079e-07	9.82539731990446e-07	663.66131977799	718.108609246088	610.456450037013	1529.96336386179	1975.91601331276	2493.93321949168
ENSGALG00000009241	SFRP2	-5.77995961095376	4.31153489857698	8.41684337167593e-37	2.77003954438059e-35	794.801556053738	732.104232184895	1416.94668196328	23.0363166777551	10.852716774844	28.5085844624552
ENSGALG00000009248	HSPA12A	-5.77052597884089	6.04264201293637	8.83701351710478e-57	9.08568296723727e-55	3250.12380953544	2511.98652119274	4026.83755532179	55.93911244953	76.6462914561803	67.3684704596726
ENSGALG00000009252	PLD1	-2.24270613861793	1.030872615347	1.34675657332108e-06	4.15589400464344e-06	78.1231609071693	78.4734905257951	91.4650418170437	13.9847781123825	18.5008289721815	27.610028876915
ENSGALG00000009261	VAX1	-5.44012442698618	0.795113255217055	3.11977890362932e-12	1.73855578146368e-11	68.1909604981727	136.418808747357	44.4590131679618	5.01627332413703	1.03831634961259	0
ENSGALG00000009272	Uncharacterised	-1.11152941358413	4.04662207101257	0.000636487436331455	0.00133381780187456	664.04686771094	412.403237444072	627.188858174014	299.507331240192	241.391768494177	365.556782330355
ENSGALG00000009279	SFMBT2	-3.56244762608661	3.85015825585758	4.47004868691747e-15	3.22558518686542e-14	607.956028103427	791.229090734671	607.891506969631	34.2778677149364	40.4943376348911	131.259643131141
ENSGALG00000009280	NPY2R	-6.48350055813032	1.35926425704488	7.8019247433675e-22	9.9210860854538e-21	102.195055274907	159.03376633103	115.181583388775	0.834824367295693	2.37571537187126	1.16539817603187
ENSGALG00000009282	MIDEAS	1.05431611618749	3.98241722645672	0.00135178368096594	0.00268152960823382	195.634659641344	284.49867979385	293.336767693072	570.499021632599	572.9589967389	675.435007744035
ENSGALG00000009286	ATP5G3	2.20722728664344	7.76826330544347	1.73491725888219e-15	1.29927767388789e-14	1692.45564986852	2257.66586185562	1922.7929988358	12617.1027834256	7760.66274087671	10520.7972518234
ENSGALG00000009293	CHN1	-1.09305024986873	6.12793458868844	1.27997035434489e-05	3.458188390645e-05	2099.58328374867	2508.75543269606	2593.01094167092	1154.0993311218	1103.29675392152	1621.55637831676
ENSGALG00000009298	Uncharacterised	-2.56508852159059	7.15275538479171	1.35352196854013e-21	1.69196624587632e-20	7357.52049512031	5909.31601733717	5161.71906298927	1269.81986626519	929.987744473436	1369.94233579725
ENSGALG00000009300	NUMB	-1.67817516971006	5.9800509423723	1.69771559740849e-10	8.06764671029339e-10	2568.79464894155	2617.20314521484	2089.90887385949	875.263076923043	787.4375216864	904.601289452711
ENSGALG00000009309	EIF5A2	3.38623551918152	8.55784004739537	3.33703376502061e-30	7.71064091036033e-29	1428.96879013706	1817.84430125608	1731.73006677559	14459.1580415614	16792.744106072	29468.258279142
ENSGALG00000009325	OLA1	1.14056178390062	6.17427747057957	3.3240306848638e-05	8.51586227030107e-05	1210.84870489712	894.206733655437	1302.08896183531	2573.05641500664	1971.02033118513	4321.42626143383
ENSGALG00000009328	EIF3A	1.42941350458047	9.53540734974428	2.23225506804277e-08	8.43727528283022e-08	12077.975651256	9256.87953018312	9087.81517222825	29900.3959197938	26190.2936633666	37863.2709256262
ENSGALG00000009331	FBXO28	-1.43948792951485	4.81365003635292	2.26665898339648e-06	6.78463057927951e-06	1263.88057783551	1039.53517302043	801.70258879453	489.249711698934	376.593698731996	424.925602953508
ENSGALG00000009336	FAM45A	-1.43349288777982	4.44862041422322	5.34009104315609e-06	1.51660872602525e-05	764.700930850167	798.482035120382	842.327927217044	247.942837086821	350.418017351012	410.22015796322
ENSGALG00000009338	ZFYVE1	-1.81023462018082	6.51416187866041	5.73666825054895e-12	3.12465835757826e-11	4024.11990183806	2803.3160852134	3932.77251322777	1147.8095179438	891.5924242718	1515.70640725387
ENSGALG00000009346	HN1L	1.19019004382528	5.88124920063879	3.44748183706545e-06	1.00381891558725e-05	805.392123158077	851.094373995249	1058.04436025523	2311.31110730922	1833.47244494383	3020.85810090148
ENSGALG00000009352	DPF3	-1.48594998360138	3.90890167614614	1.10706171764646e-05	3.02180686584584e-05	433.273846626465	610.558850570915	624.653422353085	224.652923233632	213.149422929784	233.367903735519
ENSGALG00000009356	SKIL	-2.06221859109421	5.90493253699776	1.00294304972571e-13	6.37987226307536e-13	2629.91691666149	2640.79226688823	2043.02011364232	575.393001794909	676.065815542812	716.279307139705
ENSGALG00000009360	CAPN2	-2.22296943221681	4.22651832577963	0.000265714783382385	0.000593402965279902	965.845165931288	685.694780013564	676.360853204476	341.606079022542	22.8277640228071	234.346399458509
ENSGALG00000009361	GUCY1B1	-2.69035544318969	5.81490385162358	2.68465823457141e-17	2.34408309184467e-16	2883.40450287417	2439.14658583694	2051.49143132531	515.11742183002	415.52077691595	332.74613050109
ENSGALG00000009365	CYP51A1	2.16840190941834	7.45487043991015	3.72793028395775e-17	3.22949309968201e-16	1696.36017419766	1746.75375156543	1389.14774718003	8761.63829146122	6738.3322538163	9308.55994857473
ENSGALG00000009368	RGS6	-6.63998812224676	2.13978253353784	2.41393697935752e-28	4.83626074882459e-27	202.318955169849	220.393632966063	230.444391071513	1.16539817603187	2.64297556745449	3.3132034652298
ENSGALG00000009369	PRDX3	1.0789494683441	6.2691664135791	6.03308523025389e-05	0.000148730129012746	1426.61708080869	1306.41135533173	1015.78360975834	3349.64870334733	2691.24273535339	2852.59486304938
ENSGALG00000009372	PHC3	-2.8923934083828	4.1712242372921	3.81750907831388e-13	2.31405954779145e-12	561.001974822706	1021.55760990464	813.447926870248	86.3372018701801	146.885353625188	124.195794262679
ENSGALG00000009373	CTSO	-3.20721585942488	4.11942849233461	1.11650105328736e-19	1.17245870702694e-18	775.467787371949	652.951577691836	937.59966370017	100.442161700351	93.1622981453908	93.8561404181817
ENSGALG00000009383	SAMD7	1.40590308707705	6.1162309988018	1.01961481952378e-06	3.18867044360856e-06	1200.48551697674	852.416079393421	821.83277960445	2892.74935002068	2944.78155894212	2623.91132508462
ENSGALG00000009387	Uncharacterised	-3.16323762535617	5.77532739155899	4.80003965685814e-26	8.2250439305628e-25	2474.30755980392	2671.09261946506	2307.31767038777	378.809596191274	278.438958105039	273.822392472987
ENSGALG00000009388	SUSD4	-2.27347934013965	3.92947991691884	8.46327867282698e-07	2.67896097942015e-06	651.457580401818	473.973618430173	778.602814329003	247.39000953937	54.26358387422	159.172929915375
ENSGALG00000009392	TLR5	-2.00219885067644	1.07865446866899	4.6038646175982e-05	0.000115405512045369	84.6431212236195	68.5557354298727	95.5251041643584	34.2416460342107	10.5647966969	27.2837617494714
ENSGALG00000009400	SLC8A3	-3.53899565053511	5.47449095693494	9.45648548152438e-32	2.37991208617567e-30	1901.47779395283	1900.33154429391	2387.08928775935	221.429311021229	182.482852037363	195.351734126215
ENSGALG00000009402	LRRC34	-2.26301671833179	3.04330757804744	2.98704512987425e-05	7.7046245736138e-05	349.598727061054	395.068870132346	281.288756389604	31.7697310528678	128.751227351961	67.341903867281
ENSGALG00000009403	GRK5	-4.1373830373176	4.02602350843868	6.45062144218271e-16	5.01198548258168e-15	796.255293861534	698.747995426495	830.312522469007	30.3003525768287	80.170258879453	28.7144300319916
ENSGALG00000009405	GRIA2	-1.15125980299795	7.94031632153476	4.57647391041259e-05	0.000114762286772173	10133.6139187169	9255.59231404515	6259.44713558806	4917.8983435561	3878.11383375077	4182.47008015142
ENSGALG00000009413	BROX	-1.20577043178198	6.5015464479547	1.12064576048769e-05	3.05694185662994e-05	3285.6517727359	3351.53729330507	2926.60003988333	1132.84172570095	1672.72763922588	1871.87664987018
ENSGALG00000009415	SMOC1	-4.23154201926858	2.10278055628111	7.0872847000939e-12	3.82730688018507e-11	232.457650105496	241.959629356407	136.275425305723	22.842959691477	2.28277640228071	12.4856688236091
[truncated: 4,961 more rows]
